# Supplementary material for: Ritter-type amination of C–H bonds at tertiary carbon centers using iodic acid as an oxidant
Source: Royal Society of Chemistry journal article supplement (doi:10.1039/c6cc07164c), 2016-01-01

## Supporting Information

### Table of Contents

|                                                                             |    |
|-----------------------------------------------------------------------------|----|
| 1. General.....                                                             | 2  |
| 2. Materials .....                                                          | 2  |
| 3. Preparation of 3-iodo-3-methylbutyl benzoate (6).....                    | 3  |
| 4. Screening of oxidants .....                                              | 4  |
| 5. Screening of mediators .....                                             | 5  |
| 6. Optimization of reaction conditions .....                                | 6  |
| 7. Regioselectivity in the reaction of 1g.....                              | 7  |
| 8. Reaction of adamantane .....                                             | 8  |
| 9. Hydrolysis of the acetamide product 2a.....                              | 9  |
| 10. Reaction profile .....                                                  | 9  |
| 11. Investigation of KIE.....                                               | 10 |
| 12. Stereochemical course of the reaction using ( <i>S</i> )-1f .....       | 13 |
| 13. Reaction of alkyl iodide 6 leading to amide 2a.....                     | 15 |
| 14. The Ritter-type C–H amination: typical procedure and product data ..... | 16 |
| 15. References .....                                                        | 25 |
| 16. NMR spectra.....                                                        | 27 |

## 1. General

New compounds were characterized by  $^1\text{H}$ ,  $^{13}\text{C}$ , IR, MS, and HRMS.  $^1\text{H}$  and  $^{13}\text{C}$  NMR spectra were recorded on a JEOL JMT-400/54/SS spectrometer ( $^1\text{H}$  NMR, 400 MHz;  $^{13}\text{C}$  NMR, 100 MHz).  $^1\text{H}$  NMR chemical shifts were determined relative to  $\text{Me}_4\text{Si}$  (0.0 ppm) as an internal standard.  $^{13}\text{C}$  NMR chemical shifts were determined relative to  $\text{CDCl}_3$  (77.0 ppm). Infrared spectra were recorded on a SHIMADZU IRAffinity-1 FT-IR Spectrometer. Mass spectra were obtained on a SHIMADZU GCMS-QP2010 and a JEOL JMS-DX303HF mass spectrometer. High-resolution mass spectra were obtained on a JEOL JMS-DX303HF mass spectrometer. Melting points were determined on a Stanford Research Systems MPA100 OptiMelt Automated Melting Point System. Chiral-phase high-performance liquid chromatography (HPLC) was performed on a SHIMADZU prominence series instruments equipped with chiral columns. Optical rotations were measured in a thermostated conventional 10 cm cell on a JASCO DIP-1000 polarimeter using the sodium-D line (589 nm). All reactions were carried out under nitrogen. Products were purified by chromatography on silica gel BW-300 (Fuji Silysia Chemical Ltd.) or Chromatorex NH (Fuji Silysia Chemical Ltd.). Analytical thin-layer chromatography (TLC) was performed on pre-coated silica gel glass plates (Merck silica gel 60  $\text{F}_{254}$  and Fuji Silysia Chromatorex NH, 0.25 mm thickness). Compounds were visualized with UV lamp or treatment with an ethanolic solution of phosphomolybdic acid followed by heating.

## 2. Materials

Dehydrated acetonitrile was used from a solvent purification system. Starting materials **1c**,<sup>1</sup> **1d**,<sup>2</sup> **1e**,<sup>3</sup> **1f**,<sup>4</sup> **1g**,<sup>4</sup> **1k**,<sup>5</sup> **1l**,<sup>2</sup> **1m**,<sup>2</sup> and **1n**<sup>6</sup> were prepared according to literature procedures. Analytical data for **1d**,<sup>2</sup> **1f**,<sup>2</sup> **1g**,<sup>7</sup> **1k**,<sup>8</sup> **1l**,<sup>2</sup> and **1m**,<sup>2</sup> were in excellent agreement with reported data. Iodic acid ( $\text{HIO}_3$ ) and *N*-hydroxyphthalimide (NHPI) were purchased and used as obtained. All other solvents and reagents were purchased and used as obtained.

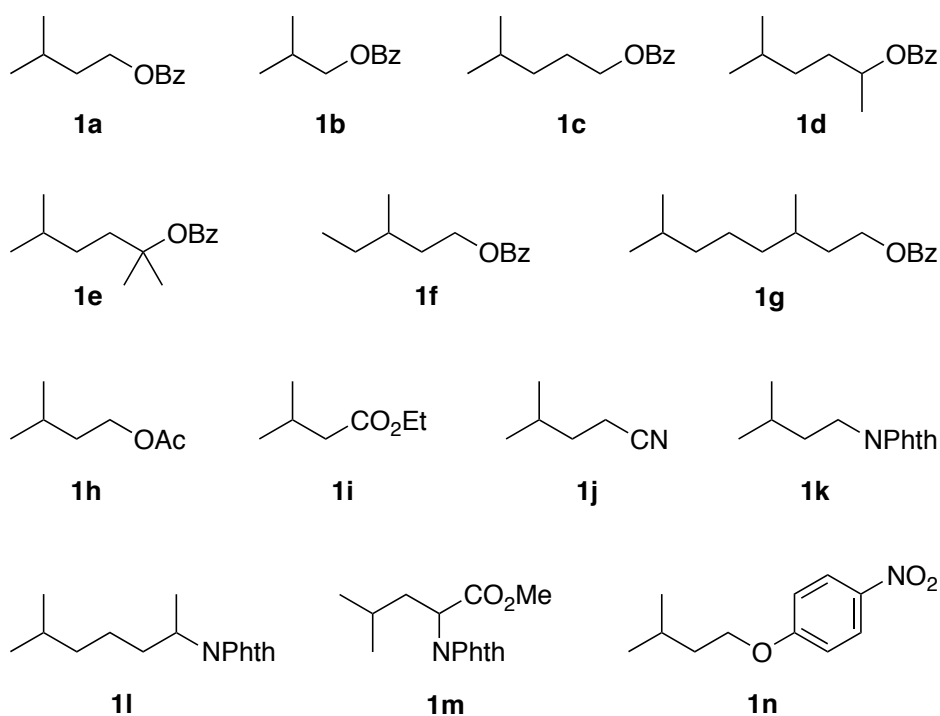

**Figure S1. List of substrates**

### 3. Preparation of 3-iodo-3-methylbutyl benzoate (6)

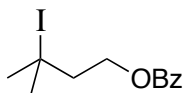

MeSO<sub>3</sub>H (0.95 mL, 14.5 mmol) was added dropwise to a solution of NaI (2.27 g, 15.1 mmol) and 3-hydroxy-3-methylbutyl benzoate (1.11 g, 5.3 mmol) in MeCN (25 mL) at 0 °C. The reaction mixture was stirred at 0 °C for 4 h, then allowed to warm to room temperature and it was stirred for an additional 30 min. Next, the reaction mixture was diluted with Et<sub>2</sub>O, washed (water, saturated NaHCO<sub>3</sub> aq., saturated Na<sub>2</sub>S<sub>2</sub>O<sub>3</sub> aq., and brine), dried over Na<sub>2</sub>SO<sub>4</sub>, and concentrated under reduced pressure. The residue was purified by flash column chromatography on silica gel (hexane/EtOAc = 95:5) to give the product as a yellow oil (1.00 g, 59% yield). <sup>1</sup>H NMR (400 MHz, CDCl<sub>3</sub>) δ 8.04 (d, *J* = 7.6 Hz, 2H), 7.57 (t, *J* = 7.6 Hz, 1H), 7.45 (t, *J* = 7.6 Hz, 2H), 4.57 (t, *J* = 6.8 Hz, 2H), 2.18 (t, *J* = 6.8 Hz, 2H), 2.03 (s, 6H); <sup>13</sup>C NMR (100 MHz, CDCl<sub>3</sub>) δ 166.4, 133.0, 130.0, 129.5, 128.4, 65.1, 48.1, 46.3, 38.5; IR (ATR) 3063, 1717 cm<sup>-1</sup>; MS (CI) *m/z* 319 ([M+H]<sup>+</sup>, 42); HRMS: (CI) calcd for (C<sub>12</sub>H<sub>16</sub>O<sub>2</sub>I) 319.0195 ([M+H]<sup>+</sup>), found *m/z* 319.0189

#### 4. Screening of oxidants

An oven dried 3 mL reaction vial containing a magnetic stir bar was charged with oxidant (0.40 mmol), NHPI (0.08 mmol), MeCN (1 mL), and isoamyl benzoate (**1a**) (0.20 mmol). The vial was purged with N<sub>2</sub> and sealed with a screw cap. The reaction mixture was stirred at 80 °C for 12 h. The reaction was then quenched by Na<sub>2</sub>S<sub>2</sub>O<sub>3</sub> aq. (1 M, 10 mL). The mixture was extracted with diethyl ether (3 x 10 mL), and the combined organic layers were dried over Na<sub>2</sub>SO<sub>4</sub>. The solution was concentrated under reduced pressure to give the crude product, which was analyzed by <sup>1</sup>H NMR spectroscopy using 1,1,2,2-tetrachloroethane as an internal standard.

The results are summarized in Table S1. The reaction using HIO<sub>3</sub> as well as I<sub>2</sub>O<sub>5</sub> proceeded efficiently to provide **2a**, while NaIO<sub>3</sub> and NH<sub>4</sub>IO<sub>3</sub> showed no reactivity (entries 1–4). Several common oxidants were not effective for this amination (entries 5–12). In the case of the reaction in the presence of I<sub>2</sub>, CAN, Oxone, and *m*CPBA also effectively promoted the amination, while reactions using PhI(OAc)<sub>2</sub> and K<sub>2</sub>S<sub>2</sub>O<sub>8</sub> failed to give **2a** (entries 13–18).

**Table S1.**

| <div style="display: flex; align-items: center; justify-content: center;"> <div style="text-align: center;"> 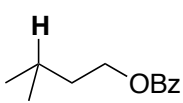 <p><b>1a</b> (0.2 mmol)</p> </div> <div style="margin: 0 20px; text-align: center;">             oxidant (2 equiv)<br/>             NHPI (0.4 equiv)<br/>             additive<br/> <hr/>             MeCN (1 mL), 80 °C, 12 h         </div> <div style="text-align: center;">  <p><b>2a</b></p> </div> </div> |                                              |                            |                        |                           |
|---------------------------------------------------------------------------------------------------------------------------------------------------------------------------------------------------------------------------------------------------------------------------------------------------------------------------------------------------------------------------------------------------------------------------------------------------------------------------------------------------------------------------------------------------------------------------------------------------|----------------------------------------------|----------------------------|------------------------|---------------------------|
| entry                                                                                                                                                                                                                                                                                                                                                                                                                                                                                                                                                                                             | oxidant                                      | additive                   | yield (%) <sup>a</sup> | recovery (%) <sup>a</sup> |
| 1 <sup>b,c</sup>                                                                                                                                                                                                                                                                                                                                                                                                                                                                                                                                                                                  | HIO <sub>3</sub>                             | -                          | 72                     | <5                        |
| 2 <sup>b,c,d</sup>                                                                                                                                                                                                                                                                                                                                                                                                                                                                                                                                                                                | I <sub>2</sub> O <sub>5</sub>                | -                          | 70                     | <5                        |
| 3                                                                                                                                                                                                                                                                                                                                                                                                                                                                                                                                                                                                 | NaIO <sub>3</sub>                            | -                          | 0                      | 82                        |
| 4                                                                                                                                                                                                                                                                                                                                                                                                                                                                                                                                                                                                 | NH <sub>4</sub> IO <sub>3</sub>              | -                          | 0                      | 85                        |
| 5                                                                                                                                                                                                                                                                                                                                                                                                                                                                                                                                                                                                 | CAN                                          | -                          | 19                     | 44                        |
| 6                                                                                                                                                                                                                                                                                                                                                                                                                                                                                                                                                                                                 | Oxone                                        | -                          | 0                      | 91                        |
| 7                                                                                                                                                                                                                                                                                                                                                                                                                                                                                                                                                                                                 | <i>m</i> CPBA                                | -                          | 0                      | 73                        |
| 8                                                                                                                                                                                                                                                                                                                                                                                                                                                                                                                                                                                                 | PhI(OAc) <sub>2</sub>                        | -                          | <5                     | 86                        |
| 9                                                                                                                                                                                                                                                                                                                                                                                                                                                                                                                                                                                                 | K <sub>2</sub> S <sub>2</sub> O <sub>8</sub> | -                          | <5                     | 56                        |
| 10                                                                                                                                                                                                                                                                                                                                                                                                                                                                                                                                                                                                | Selectfluor                                  | -                          | <5                     | 24                        |
| 11                                                                                                                                                                                                                                                                                                                                                                                                                                                                                                                                                                                                | DDQ                                          | -                          | 0                      | 87                        |
| 12                                                                                                                                                                                                                                                                                                                                                                                                                                                                                                                                                                                                | IBX                                          | -                          | 0                      | >95                       |
| 13                                                                                                                                                                                                                                                                                                                                                                                                                                                                                                                                                                                                | CAN                                          | I <sub>2</sub> (0.5 equiv) | 53                     | 13                        |
| 14                                                                                                                                                                                                                                                                                                                                                                                                                                                                                                                                                                                                | Oxone                                        | I <sub>2</sub> (0.5 equiv) | 69                     | 0                         |
| 15                                                                                                                                                                                                                                                                                                                                                                                                                                                                                                                                                                                                | <i>m</i> CPBA                                | I <sub>2</sub> (0.5 equiv) | 65                     | 5                         |
| 16                                                                                                                                                                                                                                                                                                                                                                                                                                                                                                                                                                                                | PhI(OAc) <sub>2</sub>                        | I <sub>2</sub> (0.5 equiv) | <5                     | 71                        |
| 17                                                                                                                                                                                                                                                                                                                                                                                                                                                                                                                                                                                                | K <sub>2</sub> S <sub>2</sub> O <sub>8</sub> | I <sub>2</sub> (0.5 equiv) | 0                      | >95                       |
| 18                                                                                                                                                                                                                                                                                                                                                                                                                                                                                                                                                                                                | -                                            | I <sub>2</sub> (0.5 equiv) | 0                      | >95                       |

<sup>a</sup> Determined by <sup>1</sup>H NMR analysis. <sup>b</sup> Reactions were conducted on a 0.4 mmol scale.

<sup>c</sup> Alcohol **2a'** was generated (entry 1: 5%, entry 2: 8%). <sup>d</sup> I<sub>2</sub>O<sub>5</sub> (1 equiv) was used.

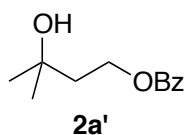

## 5. Screening of mediators

An oven dried 3 mL reaction vial containing a magnetic stir bar was charged with HIO<sub>3</sub> (0.80 mmol), mediator (0.16 mmol), MeCN (2 mL), and isoamyl benzoate (**1a**) (0.40 mmol). The vial was purged with N<sub>2</sub> and sealed with a screw cap. The reaction mixture

was stirred at 80 °C for 12 h. The solid precipitates were filtered off, and the filtrate was concentrated under reduced pressure to give the crude product, which was analyzed by <sup>1</sup>H NMR spectroscopy using 1,1,2,2-tetrachloroethane as an internal standard.

The results are summarized in Table S2. Imide-based reagents, NHPI, NDHPI, and SuOH, were found to be suitable for this reaction (entries 1–3), and NHPI gave the best result. However, amide-based reagents, PBHA and NMBHA, were inactive (entries 4 and 5).

**Table S2.**

| 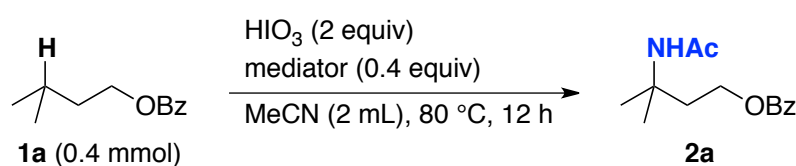 |          |                        |                           |
|------------------------------------------------------------------------------------|----------|------------------------|---------------------------|
| entry                                                                              | mediator | yield (%) <sup>a</sup> | recovery (%) <sup>a</sup> |
| 1                                                                                  | NHPI     | 77                     | <5                        |
| 2                                                                                  | NDHPI    | 69                     | <5                        |
| 3                                                                                  | SuOH     | 40                     | 59                        |
| 4                                                                                  | PBHA     | 0                      | >95                       |
| 5                                                                                  | NMBHA    | <5                     | >95                       |

<sup>a</sup> Determined by <sup>1</sup>H NMR analysis.

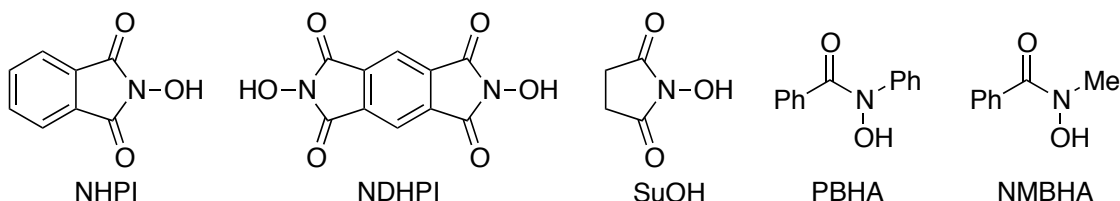

## 6. Optimization of reaction conditions

An oven dried 3 mL reaction vial containing a magnetic stir bar was charged with HIO<sub>3</sub>, NHPI, MeCN (2 mL), and isoamyl benzoate (**1a**) (0.40 mmol). The vial was purged with N<sub>2</sub> and sealed with a screw cap. The reaction mixture was stirred at 80 °C for the indicated time. The reaction was quenched by passing the solution through a short column (NH silica gel) using EtOAc as the eluent. The solution was concentrated under reduced pressure to give the crude product, which was analyzed by <sup>1</sup>H NMR spectroscopy using 1,1,2,2-tetrachloroethane as an internal standard. Purification was performed by flash column chromatography on silica gel (hexane/EtOAc).

The results are summarized in Table S3. Examination of reactions by varying the amount of reagents (HIO<sub>3</sub> and NHPI) revealed that the use of HIO<sub>3</sub> (0.8 equiv) and NHPI (0.2 equiv) in conjunction with a longer reaction time of 24 h afforded **2a** in 74% yield (entries 1–4). Using lower amounts of reagents resulted in a decreased yield of the product (entries 5–8). The addition of I<sub>2</sub> had a negligible effect on the reaction (entry 9). Control experiments in the absence of either HIO<sub>3</sub> or NHPI revealed that both reagents were required for this transformation (entries 10 and 11). The reaction proceeded equally well, even in the dark (entry 12).

**Table S3.**

| <div style="display: flex; align-items: center; justify-content: center;"> <div style="text-align: center;"> 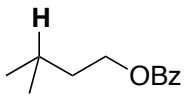 <p><b>1a</b> (0.4 mmol)</p> </div> <div style="margin: 0 20px; text-align: center;"> <math>\xrightarrow[\text{MeCN (2 mL), 80 }^{\circ}\text{C, time}]{\text{HIO}_3 \text{ (x equiv)} \\ \text{NHPI (y equiv)}}</math> </div> <div style="text-align: center;">  <p><b>2a</b></p> </div> </div> |                          |              |      |                        |                           |
|-----------------------------------------------------------------------------------------------------------------------------------------------------------------------------------------------------------------------------------------------------------------------------------------------------------------------------------------------------------------------------------------------------------------------------------------------------------------------------------------------------------------------------------------------------------------------------------|--------------------------|--------------|------|------------------------|---------------------------|
| entry                                                                                                                                                                                                                                                                                                                                                                                                                                                                                                                                                                             | HIO <sub>3</sub> (equiv) | NHPI (equiv) | time | yield (%) <sup>a</sup> | recovery (%) <sup>a</sup> |
| 1                                                                                                                                                                                                                                                                                                                                                                                                                                                                                                                                                                                 | 2.0                      | 0.4          | 12   | 77 (70)                | <5                        |
| 2                                                                                                                                                                                                                                                                                                                                                                                                                                                                                                                                                                                 | 1.0                      | 0.4          | 12   | 78 (71)                | <5                        |
| 3                                                                                                                                                                                                                                                                                                                                                                                                                                                                                                                                                                                 | 0.8                      | 0.4          | 12   | 73                     | 5                         |
| 4                                                                                                                                                                                                                                                                                                                                                                                                                                                                                                                                                                                 | 0.8                      | 0.2          | 24   | 74 (71)                | 9                         |
| 5                                                                                                                                                                                                                                                                                                                                                                                                                                                                                                                                                                                 | 0.5                      | 0.4          | 12   | 65                     | 22                        |
| 6                                                                                                                                                                                                                                                                                                                                                                                                                                                                                                                                                                                 | 0.5                      | 0.4          | 24   | 67                     | 28                        |
| 7                                                                                                                                                                                                                                                                                                                                                                                                                                                                                                                                                                                 | 0.8                      | 0.1          | 24   | 48                     | 50                        |
| 8                                                                                                                                                                                                                                                                                                                                                                                                                                                                                                                                                                                 | 0.8                      | 0.1          | 36   | 57                     | 38                        |
| 9 <sup>b</sup>                                                                                                                                                                                                                                                                                                                                                                                                                                                                                                                                                                    | 0.8                      | 0.2          | 24   | 76                     | 5                         |
| 10                                                                                                                                                                                                                                                                                                                                                                                                                                                                                                                                                                                | 0                        | 0.2          | 24   | 0                      | 92                        |
| 11                                                                                                                                                                                                                                                                                                                                                                                                                                                                                                                                                                                | 0.8                      | 0            | 24   | 0                      | 94                        |
| 12 <sup>c</sup>                                                                                                                                                                                                                                                                                                                                                                                                                                                                                                                                                                   | 0.8                      | 0.2          | 24   | 72                     | 15                        |

<sup>a</sup> Determined by <sup>1</sup>H NMR analysis. Values in parentheses are isolated yields.

<sup>b</sup> I<sub>2</sub> (0.5 equiv) was added. <sup>c</sup> The reaction was conducted under dark.

## 7. Regioselectivity in the reaction of **1g**

An oven dried 3 mL reaction vial containing a magnetic stir bar was charged with HIO<sub>3</sub> (0.32 mmol), NHPI (0.08 mmol), MeCN (2 mL), and benzoate **1g** (0.40 mmol). The vial was purged with N<sub>2</sub> and sealed with a screw cap. The reaction mixture was stirred at 80 °C for the indicated time. The reaction was then quenched by passing the solution

through a short column (NH silica gel) using EtOAc as the eluent. The solution was concentrated under reduced pressure to give the crude product, which was analyzed by GC analysis using dodecane as an internal standard. Purification was performed by flash column chromatography on silica gel (hexane/EtOAc).

The results are summarized in Table S4.

**Table S4.**

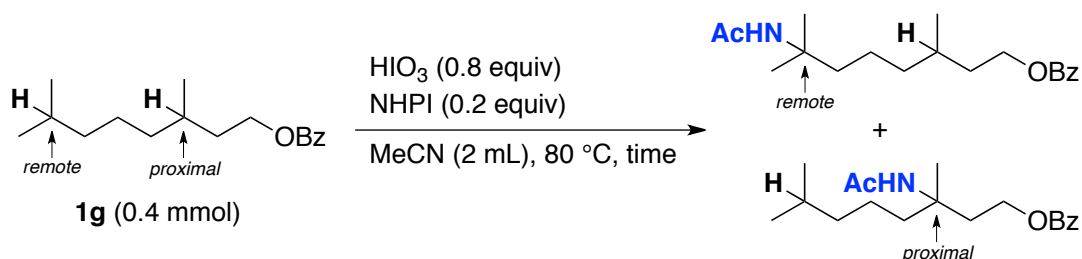

| entry | time | yield (%) <sup>a</sup> |          | recovery (%) <sup>a</sup> |
|-------|------|------------------------|----------|---------------------------|
|       |      | remote                 | proximal |                           |
| 1     | 3    | 16                     | 5        | 72                        |
| 2     | 6    | 27                     | 7        | 59                        |
| 3     | 12   | 41 (44)                | 9 (10)   | 28                        |

<sup>a</sup> Determined by GC analysis using dodecane as an internal standard.  
The response factor of minor isomer is not corrected.  
Values in parentheses are isolated yields.

## 8. Reaction of adamantane

An oven dried 3 mL reaction vial containing a magnetic stir bar was charged with HIO<sub>3</sub>, NHPI (0.08 mmol), MeCN (2 mL), and adamantane (0.40 mmol). The vial was purged with N<sub>2</sub> and sealed with a screw cap. The reaction mixture was stirred at 80 °C for 24 h. The reaction was then quenched by passing the solution through a short column (NH silica gel) using EtOAc as the eluent. The solution was concentrated under reduced pressure to give the crude product. Purification was performed by flash column chromatography on silica gel (hexane/EtOAc then MeOH).

The results are summarized in Table S5. When the reaction was conducted using 0.4 equiv. of HIO<sub>3</sub>, the monoaminated product **2s'** was obtained as the main product. Increasing the amount of HIO<sub>3</sub> provided the diaminated product **2s** efficiently, and the use of 1.2 equiv. of HIO<sub>3</sub> afforded **2s** in 61% yield. However, further increasing the amount of HIO<sub>3</sub> resulted in the formation of an complex mixture of products that could



not be separated.

**Table S5.**

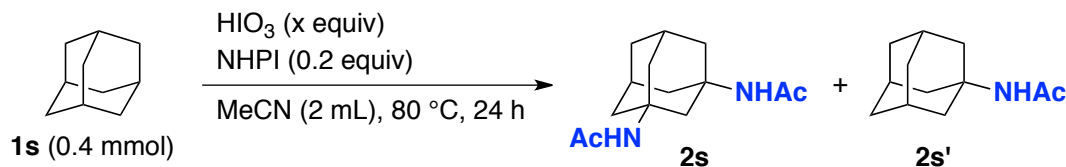

| entry | $\text{HIO}_3$ (equiv) | yield (%) <sup>a</sup> |            |
|-------|------------------------|------------------------|------------|
|       |                        | <b>2s</b>              | <b>2s'</b> |
| 1     | 0.4                    | 13                     | 49         |
| 2     | 0.8                    | 43                     | 26         |
| 3     | 1.2                    | 61                     | 13         |
| 4     | 1.6                    | n.d.                   | trace      |

<sup>a</sup> Isolated yields.

## 9. Hydrolysis of the acetamide product **2a**

A reaction flask containing a magnetic stir bar was charged with 3-acetamido-3-methylbutyl benzoate (**2a**) (500.6 mg, 2.01 mmol) and  $\text{HCl}$  aq. (3 M, 10 mL). The reaction mixture was stirred at  $100\text{ }^\circ\text{C}$  for 17 h. Then, the reaction mixture was cooled to room temperature, and  $\text{Et}_2\text{O}$  (10 mL) and  $\text{HCl}$  aq. (2 M, 10 mL) was added. The separated aqueous solution was concentrated under reduced pressure to give the crude product as a solid, which was washed with acetone gave the pure product as a white solid (220.4 mg, 79% yield) (Scheme S1).

**Scheme S1.**

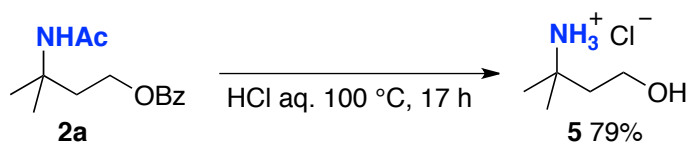

## 10. Reaction profile

Nine identical reaction mixtures were prepared as follows: an oven dried 3 mL reaction vial containing a magnetic stir bar was charged with  $\text{HIO}_3$  (0.80 mmol),  $\text{NHPI}$  (0.16 mmol),  $\text{MeCN}$  (2 mL), and methylcyclohexane (0.40 mmol). The vial was purged with

N<sub>2</sub> and sealed with a screw cap. Nine reaction mixtures were stirred in parallel at 80 °C for the indicated time. The reactions were quenched by passing the solution through a short column (NH silica gel) using EtOAc as the eluent. The solution was concentrated under reduced pressure to give the crude products, which was analyzed by <sup>1</sup>H NMR spectroscopy using 1,1,2,2-tetrachloroethane as an internal standard. Yields of **2o** were plotted versus time.

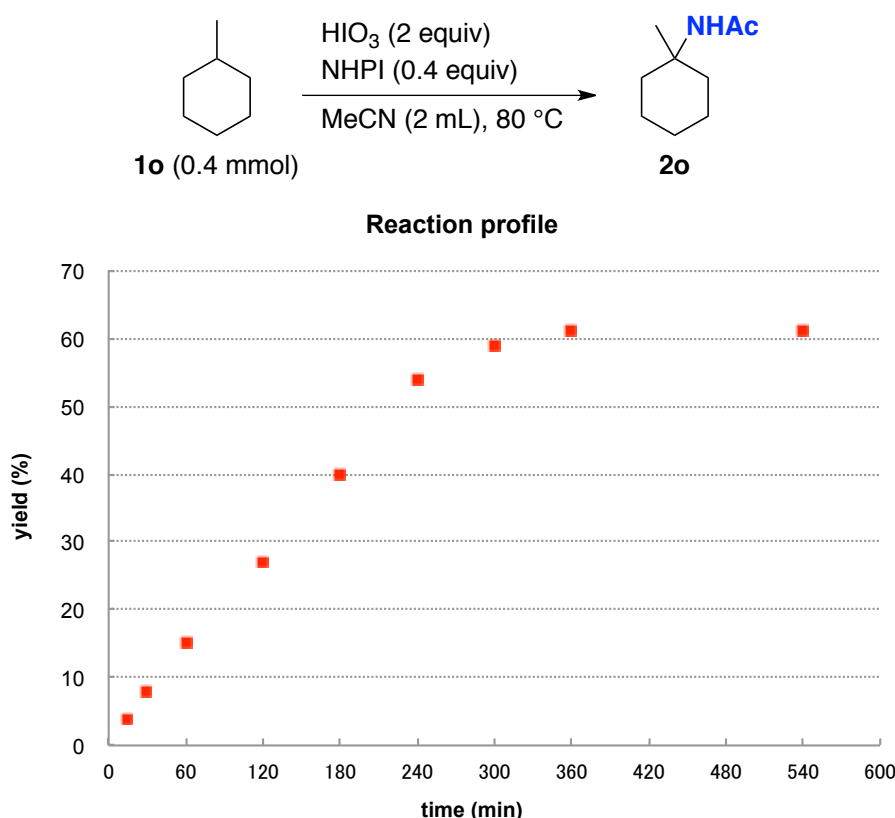

## 11. Investigation of KIE

**Reaction in the same vessel:** Three identical reaction mixtures were prepared as follows: an oven dried 3 mL reaction vial containing a magnetic stirring bar was charged with HIO<sub>3</sub> (0.20 mmol), NHPI (0.04 mmol), MeCN (0.5 mL), methylcyclohexane (0.50 mmol), and methylcyclohexane-*d*<sub>14</sub> (0.50 mmol). The vial was purged with N<sub>2</sub> and sealed with a screw cap. Three reaction mixtures were stirred in parallel at 80 °C for 60, 120, and 180 min, respectively. The reactions were quenched by passing the solution through a short column (NH silica gel) using EtOAc as the eluent. The solution was concentrated under reduced pressure to give the crude products, which

were analyzed by GC using dodecane as an internal standard. Yields of **2o** and **2o-*d*<sub>13</sub>** were plotted versus time, and the KIE value was calculated to be  $k_H/k_D = 0.1718/0.0228 = 7.5$ .

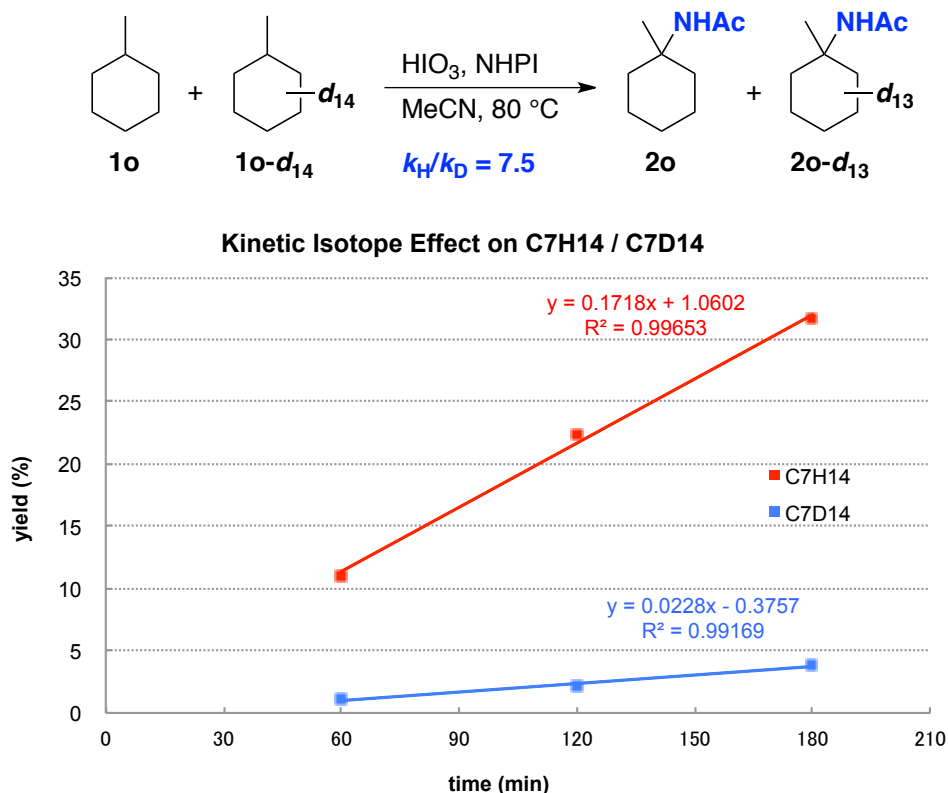

**Reactions in separate vessels:** Four identical reaction mixtures were prepared as follows: an oven dried 3 mL reaction vial containing a magnetic stir bar was charged with HIO<sub>3</sub> (0.80 mmol), NHPI (0.16 mmol), MeCN (2 mL), and methylcyclohexane (0.40 mmol). Four reaction mixtures were stirred in parallel at 80 °C for 15, 30, 45, and 60 min, respectively. The reactions were quenched by passing the solution through a short column (NH silica gel) using EtOAc as the eluent. The solution was concentrated under reduced pressure to give the crude products, which were analyzed by GC using dodecane as an internal standard. Yields of **2o** were plotted versus time. Experiments using methylcyclohexane-*d*<sub>14</sub> instead of methylcyclohexane were conducted in the same way. The KIE value was calculated to be  $k_H/k_D = 0.2074/0.0833 = 2.5$ .

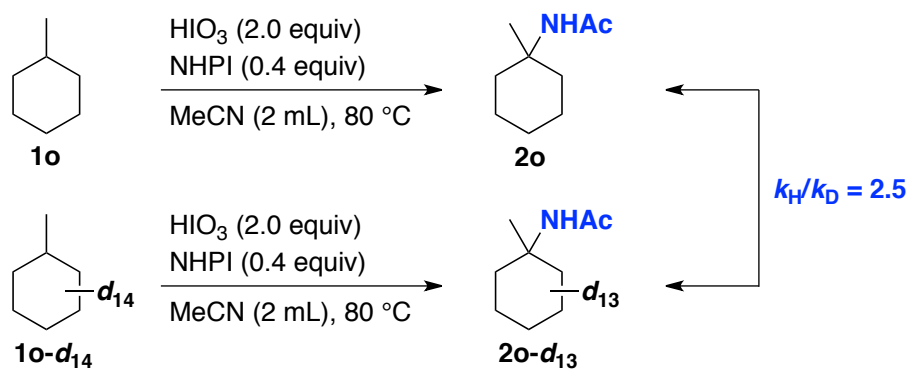

Reaction of C7H14

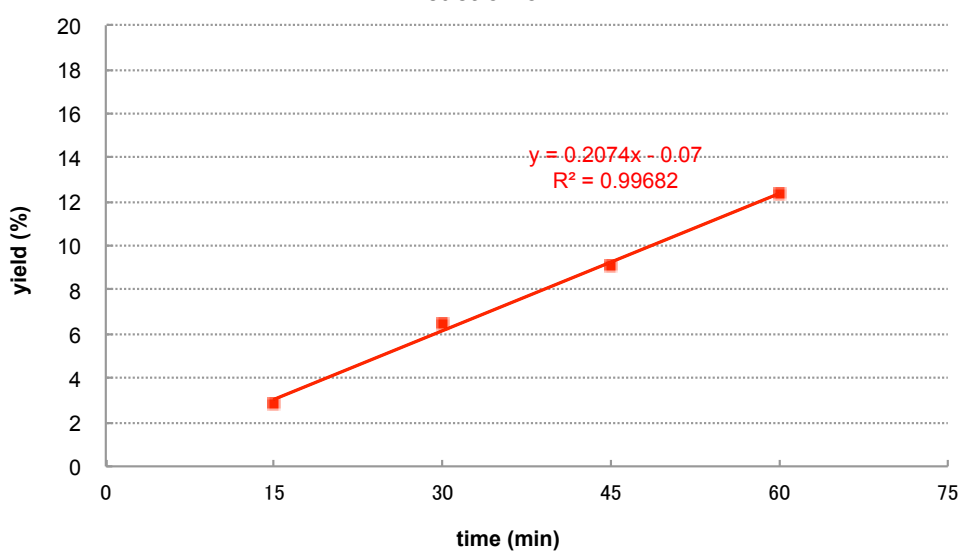

Reaction of C7D14

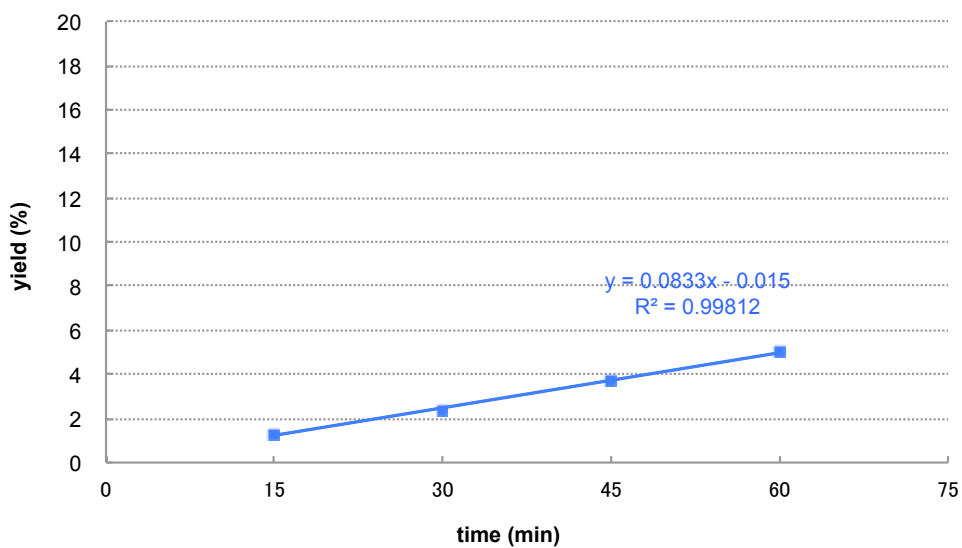

## 12. Stereochemical course of the reaction using (*S*)-**1f**

An oven dried 3 mL reaction vial containing a magnetic stir bar was charged with HIO<sub>3</sub> (0.80 mmol), NHPI (0.16 mmol), MeCN (2 mL), and (*S*)-**1f** (0.40 mmol). The vial was purged with N<sub>2</sub> and sealed with a screw cap. The reaction mixture was stirred at 80 °C for 6 h. The reaction was then quenched by passing the solution through a short column (NH silica gel) using EtOAc as the eluent. The solution was concentrated under reduced pressure to give the crude product, which was analyzed by <sup>1</sup>H NMR spectroscopy using 1,1,2,2-tetrachloroethane as an internal standard. Purification by flash column chromatography on silica gel (hexane/EtOAc) gave **2f** (33.1 mg, 32% yield, 2% ee, HPLC analysis (Chiralpak IC-3; 1.0 mL/min; *i*-PrOH/*n*-hexane 5:95; λ = 254 nm). The stereochemical information of the recovered **1f** (44.7 mg, 56% yield) was determined by a value of specific rotation (Specific rotation  $[\alpha]_D^{20} = +8.4$  (c = 0.99, CHCl<sub>3</sub>)). The value was in excellent agreement with that of the starting material (*S*)-**1f** (Specific rotation  $[\alpha]_D^{20} = +8.7$  (c = 1.06, CHCl<sub>3</sub>)).

**Scheme S2.**

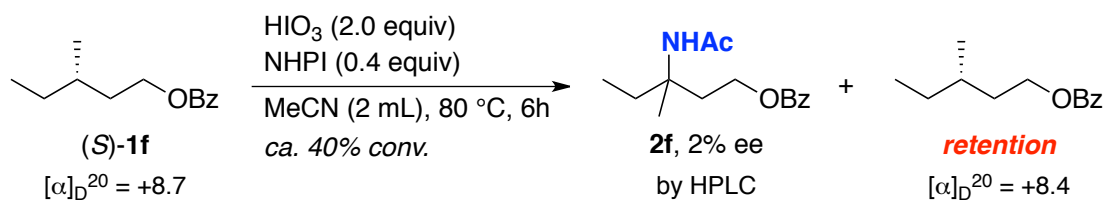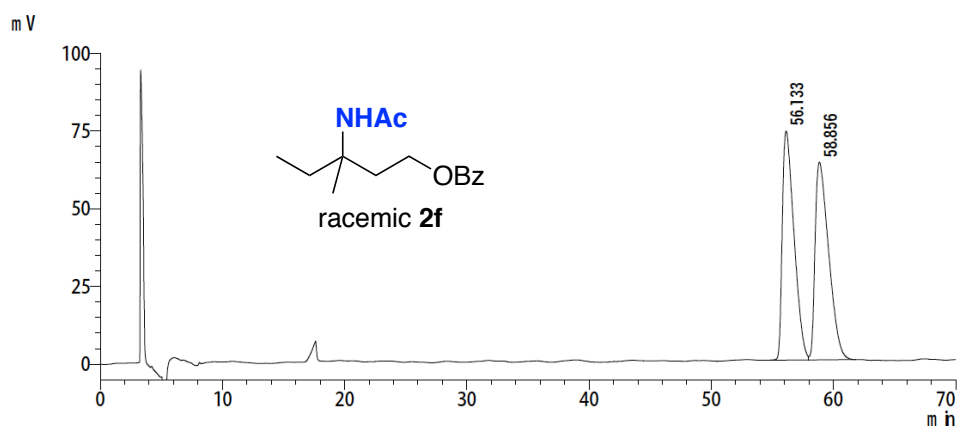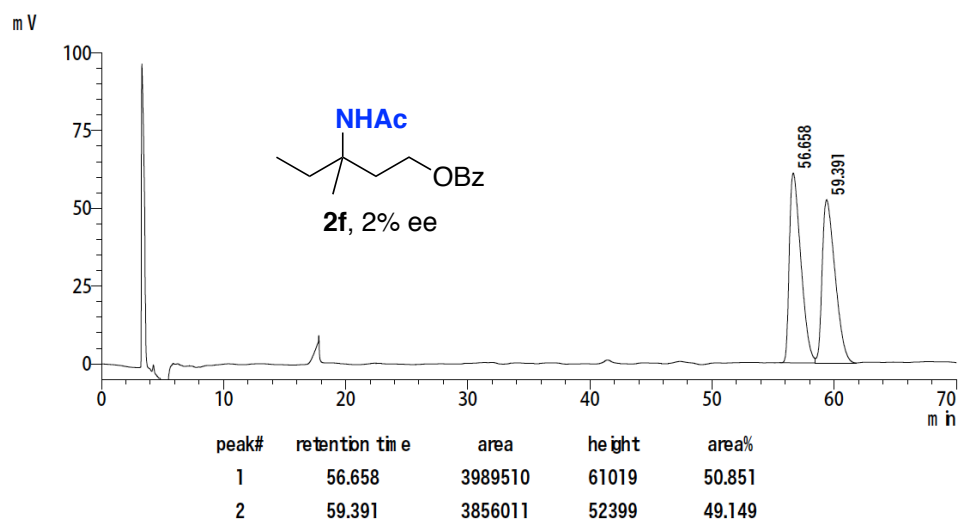

**Figure S2. HPLC charts of racemic 2f and 2f generated from (S)-1f**

### 13. Reaction of alkyl iodide **6** leading to amide **2a**

An oven dried reaction flask containing a magnetic stir bar was charged with iodide **6** (0.20 mmol), MeCN (1 mL), and an additive. The flask was purged with N<sub>2</sub>. The reaction mixture was stirred under the indicated reaction conditions. The reaction was then quenched by Na<sub>2</sub>S<sub>2</sub>O<sub>3</sub> aq. (1 M, 10 mL). The mixture was extracted with diethyl ether (3 x 10 mL), and the combined organic layers were dried over Na<sub>2</sub>SO<sub>4</sub>. The solution was concentrated under reduced pressure to give the crude product, which was analyzed by <sup>1</sup>H NMR using 1,1,2,2-tetrachloroethane as an internal standard.

The results are summarized in Table S6. Stirring a solution of **6** in MeCN at 80 °C failed to give **2a**, while the amination proceeded in the presence of HIO<sub>3</sub>, affording **2a** in low yield (entries 1–3). In the reaction under the standard conditions, an alkyl iodide could be catalytically generated in situ, thus the slow addition of **6** to a suspension of HIO<sub>3</sub> in MeCN at 80 °C was examined, and the yield of **2a** was then increased to 56% yield (entry 4). In the reaction at room temperature, **2a** was obtained in the presence of HIO<sub>3</sub> while no reaction was observed in the absence of HIO<sub>3</sub> (entries 6 and 7). An acid-promoted mechanism can be ruled out, since **2a** was not obtained in the presence of CF<sub>3</sub>CO<sub>2</sub>H (entries 8 and 9).

**Table S6.**

| <div style="display: flex; justify-content: space-around; align-items: center;"> <div> <br/> <b>6</b> (0.2 mmol)         </div> <div>           additive<br/>           MeCN (1 mL), conditions         </div> <div> <br/> <b>2a</b> </div> <div>+</div> <div> <br/> <b>2a'</b> </div> </div> |                                             |               |                        |            |                           |
|-----------------------------------------------------------------------------------------------------------------------------------------------------------------------------------------------------------------------------------------------------------------------------------------------|---------------------------------------------|---------------|------------------------|------------|---------------------------|
| entry                                                                                                                                                                                                                                                                                         | additive                                    | conditions    | yield (%) <sup>a</sup> |            | recovery (%) <sup>a</sup> |
|                                                                                                                                                                                                                                                                                               |                                             |               | <b>2a</b>              | <b>2a'</b> |                           |
| 1                                                                                                                                                                                                                                                                                             | -                                           | 80 °C, 1.5 h  | 0                      | 0          | 0 (>95) <sup>b</sup>      |
| 2                                                                                                                                                                                                                                                                                             | HIO <sub>3</sub> (0.8 equiv)                | 80 °C, 30 min | 9                      | 37         | 0                         |
| 3 <sup>c</sup>                                                                                                                                                                                                                                                                                | HIO <sub>3</sub> (0.8 equiv)                | 80 °C, 30 min | 9                      | 44         | 0                         |
| 4 <sup>d</sup>                                                                                                                                                                                                                                                                                | HIO <sub>3</sub> (0.8 equiv)                | 80 °C, 1 h    | 56                     | 7          | 0                         |
| 5 <sup>c,d</sup>                                                                                                                                                                                                                                                                              | HIO <sub>3</sub> (0.8 equiv)                | 80 °C, 1 h    | 48                     | 9          | 0                         |
| 6                                                                                                                                                                                                                                                                                             | -                                           | rt, 3 h       | 0                      | 0          | >95                       |
| 7                                                                                                                                                                                                                                                                                             | HIO <sub>3</sub> (0.8 equiv)                | rt, 1 h       | 46                     | n.d.       | 0                         |
| 8                                                                                                                                                                                                                                                                                             | CF <sub>3</sub> CO <sub>2</sub> H (1 equiv) | rt, 3 h       | 0                      | 0          | >95                       |
| 9                                                                                                                                                                                                                                                                                             | CF <sub>3</sub> CO <sub>2</sub> H (1 equiv) | 80 °C, 1.5 h  | 0                      | 0          | 0 (84) <sup>b</sup>       |

<sup>a</sup> Determined by <sup>1</sup>H NMR analysis. <sup>b</sup> Yield of benzoic acid. <sup>c</sup> NHPI (0.2 equiv) was added.

<sup>d</sup> Iodide **6** in MeCN (0.5 mL) was added dropwise for 1 h.

#### 14. The Ritter-type C–H amination: typical procedure and product data

**Typical procedure:** An oven dried 3 mL reaction vial containing a magnetic stir bar was charged with HIO<sub>3</sub> (0.32 mmol), NHPI (0.08 mmol), MeCN (2 mL), and substrates (0.40 mmol). The vial was purged with N<sub>2</sub> and sealed with a screw cap. The reaction mixture was stirred at 80 °C for the indicated time. The reaction was then quenched by passing the solution through a short column (NH silica gel) using EtOAc as the eluent. The solution was concentrated under reduced pressure to give the crude product, which was analyzed by <sup>1</sup>H NMR spectroscopy using 1,1,2,2-tetrachloroethane as an internal standard. Purification by flash column chromatography on silica gel (hexane/EtOAc) gave the pure product.

**Experimental procedure of gram-scale reaction of 1a:** An oven dried reaction flask equipped with a magnetic stir bar and reflux condenser was charged with HIO<sub>3</sub> (1.41 g, 8.01 mmol), NHPI (0.326 g, 2.00 mmol), MeCN (50 mL), and isoamyl benzoate (1.97 g, 10.2 mmol). The vial was purged with N<sub>2</sub>, and the reaction mixture was stirred under reflux (thermostated at 120 °C) for 24 h. The reaction was then quenched by Na<sub>2</sub>S<sub>2</sub>O<sub>3</sub> aq. (1 M, 50 mL). The mixture was extracted with EtOAc (100 mL), and the organic layer was washed with NaOH aq. (2 M, 2 x 50 mL) and dried over Na<sub>2</sub>SO<sub>4</sub>. The solution was concentrated under reduced pressure to give the crude product, which was purified by flash column chromatography on silica gel (hexane/EtOAc) to give the pure product as a pale yellow solid (1.81 g, 71% yield).

#### Product data

##### 3-acetamido-3-methylbutyl benzoate (2a)

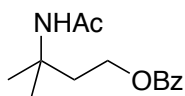

According to the typical procedure, the reaction using HIO<sub>3</sub> (56.4 mg, 0.32 mmol), NHPI (13.3 mg, 0.08 mmol), MeCN (2 mL), and isoamyl benzoate (76.4 mg, 0.40 mmol) was conducted at 80 °C for 24 h. Purification by flash column chromatography on silica gel (hexane/EtOAc = 7:3) gave the product as a pale yellow solid (69.7 mg, 71% yield). mp: 38.5–40.0 °C; <sup>1</sup>H NMR (400 MHz, CDCl<sub>3</sub>) δ 8.03 (d, *J* = 7.6 Hz, 2H), 7.56 (t, *J* = 7.6 Hz, 1H), 7.44 (t, *J* = 7.6 Hz, 2H), 5.59 (brs, 1H), 4.39 (t, *J* = 6.6 Hz, 2H), 2.27 (t, *J* = 6.6 Hz, 2H), 1.90 (s, 3H), 1.40 (s, 6H); <sup>13</sup>C NMR (100 MHz, CDCl<sub>3</sub>) δ 169.6, 166.6, 132.9, 130.1, 129.4, 128.3, 61.8, 52.7, 37.8, 27.5, 24.3; IR (ATR) 3300, 3069, 1717, 1651, 1549 cm<sup>-1</sup>; MS (CI) *m/z* 250 ([M+H]<sup>+</sup>, 21); HRMS: (EI) calcd for



(C<sub>14</sub>H<sub>19</sub>NO<sub>3</sub>) 249.1365 (M<sup>+</sup>), found *m/z* 249.1365

#### 2-acetamido-2-methylpentyl benzoate (2b)

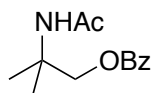

According to the typical procedure, the reaction using HIO<sub>3</sub> (141.1 mg, 0.80 mmol), NHPI (51.8 mg, 0.32 mmol), MeCN (2 mL), and isobutyl benzoate (71.8 mg, 0.40 mmol) was conducted at 80 °C for 24 h. Purification by flash column chromatography on silica gel (hexane/EtOAc = 7:3) gave the product as a white solid (44.1 mg, 47% yield). mp: 92.2–93.0 °C; <sup>1</sup>H NMR (400 MHz, CDCl<sub>3</sub>) δ 8.04 (d, *J* = 7.2 Hz, 2H), 7.58 (t, *J* = 7.2 Hz, 1H), 7.46 (t, *J* = 7.2 Hz, 2H), 5.77 (brs, 1H), 4.45 (s, 2H), 1.95 (s, 3H), 1.45 (s, 6H); <sup>13</sup>C NMR (100 MHz, CDCl<sub>3</sub>) δ 169.8, 166.5, 133.1, 129.9, 129.6, 128.4, 69.5, 53.6, 24.4, 24.1; IR (ATR) 3269, 3078, 1717, 1643, 1557 cm<sup>-1</sup>; MS (CI) *m/z* 236 ([M+H]<sup>+</sup>, 100); HRMS: (CI) calcd for (C<sub>13</sub>H<sub>18</sub>NO<sub>3</sub>) 236.1287 ([M+H]<sup>+</sup>), found *m/z* 236.1287

#### 4-acetamido-4-methylpentyl benzoate (2c)

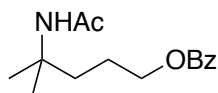

According to the typical procedure, the reaction using HIO<sub>3</sub> (56.0 mg, 0.32 mmol), NHPI (13.0 mg, 0.08 mmol), MeCN (2 mL), and 4-methylpentyl benzoate (79.1 mg, 0.38 mmol) was conducted at 80 °C for 24 h. Purification by flash column chromatography on silica gel (hexane/EtOAc = 7:3) gave the product as a white solid (79.5 mg, 79% yield). mp: 74.9–76.5 °C; <sup>1</sup>H NMR (400 MHz, CDCl<sub>3</sub>) δ 8.04 (d, *J* = 7.6 Hz, 2H), 7.56 (t, *J* = 7.6 Hz, 1H), 7.44 (t, *J* = 7.6 Hz, 2H), 5.28 (brs, 1H), 4.31 (t, *J* = 7.0 Hz, 2H), 1.98–1.82 (m, 5H), 1.80–1.68 (m, 2H), 1.33 (s, 6H); <sup>13</sup>C NMR (100 MHz, CDCl<sub>3</sub>) δ 169.4, 166.6, 132.8, 130.3, 129.5, 128.3, 65.1, 53.4, 35.9, 27.1, 24.4, 23.8; IR (ATR) 3285, 3078, 1719, 1638, 1558 cm<sup>-1</sup>; MS (CI) *m/z* 264 ([M+H]<sup>+</sup>, 100); HRMS: (CI) calcd for (C<sub>15</sub>H<sub>22</sub>NO<sub>3</sub>) 264.1600 ([M+H]<sup>+</sup>), found *m/z* 264.1601

#### 5-acetamido-5-methylhexan-2-yl benzoate (2d)

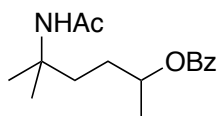

According to the typical procedure, the reaction using HIO<sub>3</sub> (56.4 mg, 0.32 mmol), NHPI (13.2 mg, 0.08 mmol), MeCN (2 mL), and 5-methylhexan-2-yl benzoate (85.4 mg, 0.39 mmol) was conducted at 80 °C for 24 h. Purification by flash column chromatography on silica gel (hexane/EtOAc = 7:3) gave the product as a yellow viscous liquid (86.0 mg, 80% yield). <sup>1</sup>H NMR (400 MHz, CDCl<sub>3</sub>) δ 8.04 (d, *J* = 7.6 Hz, 2H), 7.55 (t, *J* = 7.6 Hz, 1H), 7.44 (t, *J* = 7.6 Hz, 2H), 5.49 (brs, 1H), 5.12 (sext, *J* = 6.0 Hz, 1H), 1.92 (s, 3H), 1.89–1.52 (m, 4H), 1.35 (d, *J* = 6.0 Hz, 3H), 1.314 (s, 3H), 1.309 (s, 3H); <sup>13</sup>C NMR (100 MHz, CDCl<sub>3</sub>) δ 169.4, 166.1, 132.7, 130.6, 129.4, 128.2, 71.7, 53.2, 35.2, 30.5, 26.9, 26.8, 24.3, 19.9; IR (ATR) 3306, 3071, 1715, 1651, 1547 cm<sup>-1</sup>; MS (CI) *m/z* 278 ([M+H]<sup>+</sup>, 100); HRMS: (CI) calcd for (C<sub>16</sub>H<sub>24</sub>NO<sub>3</sub>) 278.1756 ([M+H]<sup>+</sup>), found *m/z* 278.1752

### 5-acetamido-2,5-dimethylhexan-2-yl benzoate (2e)

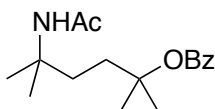

According to the typical procedure, the reaction using HIO<sub>3</sub> (141.6 mg, 0.80 mmol), NHPI (26.3 mg, 0.16 mmol), MeCN (2 mL), and 2,5-dimethylhexan-2-yl benzoate (91.5 mg, 0.39 mmol) was conducted at 80 °C for 12 h. Purification by flash column chromatography on silica gel (hexane/EtOAc = 7:3) gave the product as a white solid (95.4 mg, 84% yield). mp: 82.4–82.9 °C; <sup>1</sup>H NMR (400 MHz, CDCl<sub>3</sub>) δ 7.99 (d, *J* = 7.6 Hz, 2H), 7.54 (t, *J* = 7.6 Hz, 1H), 7.43 (t, *J* = 7.6 Hz, 2H), 5.32 (brs, 1H), 2.01–1.88 (m, 5H), 1.86–1.73 (m, 2H), 1.56 (s, 6H), 1.31 (s, 6H); <sup>13</sup>C NMR (100 MHz, CDCl<sub>3</sub>) δ 169.4, 165.9, 132.6, 131.7, 129.4, 128.2, 83.1, 53.3, 34.8, 34.0, 26.9, 26.4, 24.5; IR (ATR) 3285, 3086, 1711, 1639, 1558 cm<sup>-1</sup>; HRMS: (CI) calcd for (C<sub>17</sub>H<sub>26</sub>NO<sub>3</sub>) 292.1913 ([M+H]<sup>+</sup>), found *m/z* 292.1912

### 3-acetamido-3-methylpentyl benzoate (2f)

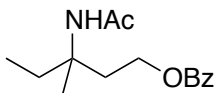

According to the typical procedure, the reaction using HIO<sub>3</sub> (140.5 mg, 0.80 mmol), NHPI (25.7 mg, 0.16 mmol), MeCN (2 mL), and 3-methylpentyl benzoate (81.9 mg, 0.40 mmol) was conducted at 80 °C for 12 h. Purification by flash column chromatography on silica gel (hexane/EtOAc = 7:3) gave the product as a yellow viscous liquid (62.9 mg, 60% yield). <sup>1</sup>H NMR (400 MHz, CDCl<sub>3</sub>) δ 8.03 (d, *J* = 8.0 Hz,

2H), 7.56 (t,  $J = 8.0$  Hz, 1H), 7.44 (t,  $J = 8.0$  Hz, 2H), 5.43 (brs, 1H), 4.39 (t,  $J = 6.8$  Hz, 2H), 2.38 (dt,  $J = 14.0, 6.8$  Hz, 1H), 2.14 (dt,  $J = 14.4, 6.8$  Hz, 1H), 2.00–1.82 (m, 4H), 1.67 (dt,  $J = 21.2, 7.2$  Hz, 1H), 1.32 (s, 3H), 0.88 (t,  $J = 7.2$  Hz, 3H);  $^{13}\text{C}$  NMR (100 MHz,  $\text{CDCl}_3$ )  $\delta$  169.6, 166.7, 132.9, 130.1, 129.4, 128.3, 61.7, 55.6, 35.9, 31.4, 24.3, 24.1, 7.9; IR (ATR) 3304, 3071, 1721, 1641, 1549  $\text{cm}^{-1}$ ; MS (CI)  $m/z$  264 ( $[\text{M}+\text{H}]^+$ , 24); HRMS: (CI) calcd for ( $\text{C}_{15}\text{H}_{22}\text{NO}_3$ ) 264.1600 ( $\text{M}^+$ ), found  $m/z$  264.1598

### 7-acetamido-3,7-dimethyloctyl benzoate (2g)

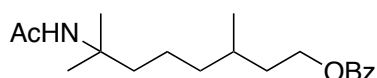

According to the typical procedure, the reaction using  $\text{HIO}_3$  (56.4 mg, 0.32 mmol),  $\text{NHPI}$  (13.1 mg, 0.08 mmol),  $\text{MeCN}$  (2 mL), and 3,7-dimethyloctyl benzoate (106.0 mg, 0.40 mmol) was conducted at 80  $^\circ\text{C}$  for 12 h. The crude product was analyzed by gas chromatography using dodecane as an internal standard. Purification by flash column chromatography on silica gel (hexane/ $\text{EtOAc} = 8:2$ ) gave the product as a yellow viscous liquid (56.5 mg, 44% yield).  $^1\text{H}$  NMR (400 MHz,  $\text{CDCl}_3$ )  $\delta$  8.04 (d,  $J = 7.6$  Hz, 2H), 7.55 (t,  $J = 7.6$  Hz, 1H), 7.44 (t,  $J = 7.6$  Hz, 2H), 5.30 (brs, 1H), 4.42–4.29 (m, 2H), 1.91 (s, 3H), 1.89–1.74 (m, 1H), 1.72–1.50 (m, 4H), 1.43–1.09 (m, 10H), 0.96 (d,  $J = 6.4$  Hz, 3H);  $^{13}\text{C}$  NMR (100 MHz,  $\text{CDCl}_3$ )  $\delta$  169.4, 166.6, 132.8, 130.4, 129.5, 128.3, 63.4, 53.6, 40.3, 37.1, 35.5, 29.9, 26.9, 24.4, 21.4, 19.5; IR (ATR) 3298, 3071, 1717, 1651, 1545  $\text{cm}^{-1}$ ; MS (CI)  $m/z$  320 ( $[\text{M}+\text{H}]^+$ , 100); HRMS: (CI) calcd for ( $\text{C}_{19}\text{H}_{30}\text{NO}_3$ ) 320.2226 ( $[\text{M}+\text{H}]^+$ ), found  $m/z$  320.2224

### 3-acetamido-3,7-dimethyloctyl benzoate

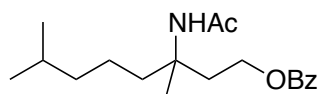

The title compound was also isolated by flash column chromatography on silica gel (hexane/ $\text{EtOAc} = 8:2$ ) gave the product as a yellow viscous liquid (13.0 mg, 10% yield).  $^1\text{H}$  NMR (400 MHz,  $\text{CDCl}_3$ )  $\delta$  8.03 (d,  $J = 8.0$  Hz, 2H), 7.56 (t,  $J = 8.0$  Hz, 1H), 7.44 (t,  $J = 8.0$  Hz, 2H), 5.33 (brs, 1H), 4.34 (dd,  $J = 6.8, 6.8$  Hz, 2H), 2.37 (dt,  $J = 14.0, 6.8$  Hz, 1H), 2.16 (dt,  $J = 14.0, 6.8$  Hz, 1H), 1.91 (s, 3H), 1.91–1.76 (m, 1H), 1.74–1.46 (m, 2H), 1.42–1.05 (m, 7H), 0.86 (d,  $J = 7.2$  Hz, 6H);  $^{13}\text{C}$  NMR (100 MHz,  $\text{CDCl}_3$ )  $\delta$  169.6, 166.7, 133.0, 130.2, 129.5, 128.4, 61.7, 55.5, 39.3, 39.1, 36.2, 27.9, 24.7, 24.4, 22.5, 21.3; IR (ATR) 3298, 3073, 1717, 1651, 1541  $\text{cm}^{-1}$ ; MS (CI)  $m/z$  320 ( $[\text{M}+\text{H}]^+$ , 30); HRMS: (CI) calcd for ( $\text{C}_{19}\text{H}_{30}\text{NO}_3$ ) 320.2226 ( $[\text{M}+\text{H}]^+$ ), found  $m/z$  320.2230

### 3-acetamido-3-methylbutyl acetate (2h)

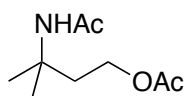

According to the typical procedure, the reaction using HIO<sub>3</sub> (55.9 mg, 0.32 mmol), NHPI (13.1 mg, 0.08 mmol), MeCN (2 mL), and isoamyl acetate (52.9 mg, 0.41 mmol) was conducted at 80 °C for 24 h. Purification by flash column chromatography on silica gel (hexane/EtOAc = 6:4) gave the product as a white solid (37.4 mg, 49% yield). mp: 58.9–59.4 °C; <sup>1</sup>H NMR (400 MHz, CDCl<sub>3</sub>) δ 5.60 (brs, 1H), 4.12 (t, *J* = 6.8 Hz, 2H), 2.11 (t, *J* = 6.8 Hz, 2H), 2.05 (s, 3H), 1.93 (s, 3H), 1.34 (s, 6H); <sup>13</sup>C NMR (100 MHz, CDCl<sub>3</sub>) δ 171.1, 169.6, 61.3, 52.6, 37.7, 27.3, 24.3, 21.0; IR (ATR) 3296, 3086, 1732, 1643, 1553 cm<sup>-1</sup>; MS (CI) *m/z* 188 ([M+H]<sup>+</sup>, 44); HRMS: (EI) calcd for (C<sub>9</sub>H<sub>17</sub>NO<sub>3</sub>) 187.1208 (M<sup>+</sup>), found *m/z* 187.1209

### ethyl 3-acetamido-3-methylbutanoate (2i)

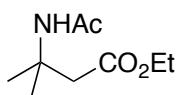

According to the typical procedure, the reaction using HIO<sub>3</sub> (140.9 mg, 0.80 mmol), NHPI (26.1 mg, 0.16 mmol), MeCN (2 mL), and ethyl isovalerate (50.1 mg, 0.38 mmol) was conducted at 80 °C for 24 h. Purification by flash column chromatography on silica gel (hexane/EtOAc = 7:3) gave the product as a yellow viscous liquid (42.2 mg, 59% yield). <sup>1</sup>H NMR (400 MHz, CDCl<sub>3</sub>) δ 6.02 (brs, 1H), 4.14 (q, *J* = 7.2 Hz, 2H), 2.71 (s, 2H), 1.93 (s, 3H), 1.43 (s, 6H), 1.26 (t, *J* = 7.2 Hz, 3H); <sup>13</sup>C NMR (100 MHz, CDCl<sub>3</sub>) δ 171.5, 169.9, 60.3, 52.0, 44.0, 27.0, 24.3, 14.1; IR (ATR) 3289, 3076, 1730, 1651, 1549 cm<sup>-1</sup>; MS (CI) *m/z* 188 ([M+H]<sup>+</sup>, 100); HRMS: (EI) calcd for (C<sub>9</sub>H<sub>17</sub>NO<sub>3</sub>) 187.1208 (M<sup>+</sup>), found *m/z* 187.1210

### 4-acetamido-4-methylpentanonitrile (2j)

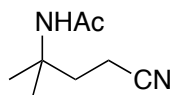

According to the typical procedure, the reaction using HIO<sub>3</sub> (140.2 mg, 0.80 mmol), NHPI (25.8 mg, 0.16 mmol), MeCN (2 mL), and isocapronitrile (37.4 mg, 0.38 mmol) was conducted at 80 °C for 24 h. Purification by flash column chromatography on silica gel (hexane/EtOAc = 7:3) gave the product as a white solid (45.3 mg, 76% yield). mp:

84.9–85.5 °C;  $^1\text{H}$  NMR (400 MHz,  $\text{CDCl}_3$ )  $\delta$  5.41 (brs, 1H), 2.33 (t,  $J = 7.2$  Hz, 2H), 2.20 (t,  $J = 7.2$  Hz, 2H), 1.95 (s, 3H), 1.34 (s, 6H);  $^{13}\text{C}$  NMR (100 MHz,  $\text{CDCl}_3$ )  $\delta$  170.0, 120.0, 52.9, 34.0, 27.2, 24.2, 12.5; IR (ATR) 3271, 3076, 2247, 1643, 1555  $\text{cm}^{-1}$ ; MS (CI)  $m/z$  155 ( $[\text{M}+\text{H}]^+$ , 100); HRMS: (EI) calcd for ( $\text{C}_8\text{H}_{14}\text{N}_2\text{O}$ ) 154.1106 ( $\text{M}^+$ ), found  $m/z$  154.1105

### ***N*-phthaloyl-3-acetamido-3-methylbutylamine (2k)**

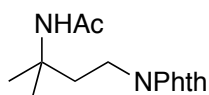

According to the typical procedure, the reaction using  $\text{HIO}_3$  (56.3 mg, 0.32 mmol), NHPI (13.1 mg, 0.08 mmol), MeCN (2 mL), and *N*-isopentylphthalimide (97.3 mg, 0.45 mmol) was conducted at 80 °C for 24 h. Purification by flash column chromatography on silica gel (hexane/EtOAc = 6:4) gave the product as a white solid (59.2 mg, 48% yield). mp: 136.1–137.6 °C;  $^1\text{H}$  NMR (400 MHz,  $\text{CDCl}_3$ )  $\delta$  7.90–7.78 (m, 2H), 7.77–7.66 (m, 2H), 5.59 (brs, 1H), 3.74 (t,  $J = 7.2$  Hz, 2H), 2.10 (t,  $J = 7.2$  Hz, 2H), 1.89 (s, 3H), 1.38 (s, 6H);  $^{13}\text{C}$  NMR (100 MHz,  $\text{CDCl}_3$ )  $\delta$  169.8, 168.2, 133.9, 132.0, 123.1, 52.7, 38.0, 33.7, 26.9, 24.2; IR (ATR) 3277, 3086, 1715, 1643, 1557  $\text{cm}^{-1}$ ; MS (CI)  $m/z$  275 ( $[\text{M}+\text{H}]^+$ , 100); HRMS: (CI) calcd for ( $\text{C}_{15}\text{H}_{19}\text{N}_2\text{O}_3$ ) 275.1396 ( $[\text{M}+\text{H}]^+$ ), found  $m/z$  275.1399

### ***N*-phthaloyl-6-acetamido-6-methylheptan-2-amine (2l)**

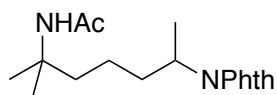

According to the typical procedure, the reaction using  $\text{HIO}_3$  (56.3 mg, 0.32 mmol), NHPI (13.1 mg, 0.08 mmol), MeCN (2 mL), and *N*-phthaloyl-6-methylheptan-2-amine (102.4 mg, 0.39 mmol) was conducted at 80 °C for 24 h. Purification by flash column chromatography on silica gel (hexane/EtOAc = 7:3) gave the product as a pale yellow viscous liquid (95.2 mg, 76% yield).  $^1\text{H}$  NMR (400 MHz,  $\text{CDCl}_3$ )  $\delta$  7.90–7.78 (m 2H), 7.77–7.62 (m 2H), 5.34 (brs, 1H), 4.42–4.28 (m 1H), 2.16–2.02 (m, 1H), 1.88 (s, 3H), 1.82–1.55 (m, 3H), 1.47 (d,  $J = 6.8$  Hz, 3H), 1.35–1.12 (m, 8H);  $^{13}\text{C}$  NMR (100 MHz,  $\text{CDCl}_3$ )  $\delta$  169.4, 168.5, 133.8, 131.8, 123.0, 53.4, 47.0, 39.6, 33.7, 26.9, 26.5, 24.3, 21.0, 18.6; IR (ATR) 3302, 3078, 1703, 1657, 1541  $\text{cm}^{-1}$ ; MS (EI)  $m/z$  316 ( $\text{M}^+$ , 1), 259 (20), 174 (58), 130 (32), 110 (21), 101 (21), 100 (100), 99 (21), 60 (23), 58 (100); HRMS: (CI) calcd for ( $\text{C}_{18}\text{H}_{25}\text{N}_2\text{O}_3$ ) 317.1865 ( $[\text{M}+\text{H}]^+$ ), found  $m/z$  317.1862

***N*-phthaloyl-4-acetamido-*L*-leucine methyl ester (2m)**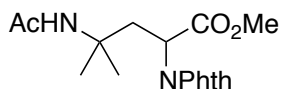

According to the typical procedure, the reaction using HIO<sub>3</sub> (139.1 mg, 0.79 mmol), NHPI (26.1 mg, 0.16 mmol), MeCN (2 mL), and *N*-phthaloyl-*L*-leucine methyl ester (102.4 mg, 0.37 mmol) was conducted at 80 °C for 24 h. Purification by flash column chromatography on silica gel (hexane/EtOAc = 4:6) gave the product as a white solid (66.6 mg, 54% yield). mp: 114.2–115.1 °C; <sup>1</sup>H NMR (400 MHz, CDCl<sub>3</sub>) δ 7.98–7.82 (m, 2H), 7.81–7.64 (m, 2H), 5.50 (brs, 1H), 4.92 (dd, *J* = 8.0, 4.4 Hz, 1H), 3.73 (s, 3H), 2.82–2.60 (m, 2H), 1.71 (s, 3H), 1.36 (s, 3H), 1.34 (s, 3H); <sup>13</sup>C NMR (100 MHz, CDCl<sub>3</sub>) δ 170.4, 169.7, 167.4, 134.2, 131.8, 123.5, 53.1, 52.7, 48.6, 38.2, 27.6, 27.0, 24.1; IR (ATR) 3279, 3078, 1749, 1715, 1645, 1557 cm<sup>-1</sup>; MS (CI) *m/z* 333 ([M+H]<sup>+</sup>, 100); HRMS: (EI) calcd for (C<sub>17</sub>H<sub>20</sub>N<sub>2</sub>O<sub>5</sub>) 332.1372 (M<sup>+</sup>), found *m/z* 332.1370

**4-nitrophenyl 2-acetamido-2-methylbutan-2-yl ether (2n)**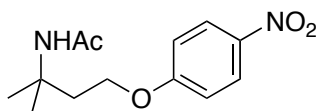

According to the typical procedure, the reaction using HIO<sub>3</sub> (140.5 mg, 0.80 mmol), NHPI (52.4 mg, 0.32 mmol), MeCN (2 mL), and isoamyl 4-nitrophenyl ether (78.2 mg, 0.37 mmol) was conducted at 80 °C for 24 h. Purification by flash column chromatography on silica gel (hexane/EtOAc = 7:3) gave the product as a white solid (43.1 mg, 43% yield). mp: 129.8–130.4 °C; <sup>1</sup>H NMR (400 MHz, CDCl<sub>3</sub>) δ 8.18 (d, *J* = 9.6 Hz, 2H), 6.94 (d, *J* = 9.6 Hz, 2H), 5.66 (brs, 1H), 4.15 (t, *J* = 6.4 Hz, 2H), 2.32 (t, *J* = 6.4 Hz, 2H), 1.95 (s, 3H), 1.42 (s, 6H); <sup>13</sup>C NMR (100 MHz, CDCl<sub>3</sub>) δ 169.8, 163.7, 141.3, 125.9, 114.3, 65.8, 52.8, 38.0, 27.6, 24.4; IR (ATR) 3117, 3080, 1668, 1589, 1528, 1337 cm<sup>-1</sup>; MS (CI) *m/z* 267 ([M+H]<sup>+</sup>, 100); HRMS: (CI) calcd for (C<sub>13</sub>H<sub>19</sub>N<sub>2</sub>O<sub>4</sub>) 267.1345 ([M+H]<sup>+</sup>), found *m/z* 267.1346

***N*-(1-methylcyclohexyl)acetamide (2o)**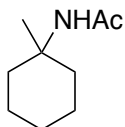

According to the typical procedure, the reaction using HIO<sub>3</sub> (140.7 mg, 0.80 mmol), NHPI (26.4 mg, 0.16 mmol), MeCN (2 mL), and methylcyclohexane (38.5 mg, 0.39 mmol) was conducted at 80 °C for 12 h. Then, volatiles were removed under reduced

pressure to give the crude product, which was purified by flash column chromatography on silica gel (hexane/EtOAc = 7:3) to give the pure product as a pale yellow solid (38.8 mg, 63% yield). mp: 82.7–83.3 °C; <sup>1</sup>H NMR (400 MHz, CDCl<sub>3</sub>) δ 5.21 (brs, 1H), 2.05–1.84 (m, 5H), 1.60–1.16 (m, 11H); <sup>13</sup>C NMR (100 MHz, CDCl<sub>3</sub>) δ 169.4, 53.3, 36.7, 26.1, 25.5, 24.6, 22.0; IR (ATR) 3297, 3087, 1641, 1555 cm<sup>-1</sup>; MS (CI) *m/z* 156 ([M+H]<sup>+</sup>, 100); HRMS: (EI) calcd for (C<sub>9</sub>H<sub>17</sub>NO) 155.1310 (M<sup>+</sup>), found *m/z* 155.1308

#### ***N*-(1-methylcyclopentyl)acetamide (2p)**

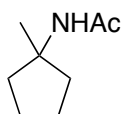

According to the typical procedure, the reaction using HIO<sub>3</sub> (140.2 mg, 0.80 mmol), NHPI (26.2 mg, 0.16 mmol), MeCN (2 mL), and methylcyclopentane (33.1 mg, 0.39 mmol) was conducted at 80 °C for 12 h. Then, volatiles were removed under reduced pressure to give the crude product, which was purified by flash column chromatography on silica gel (hexane/EtOAc = 5:5) to give the pure product as a pale yellow solid (28.1 mg, 51% yield).

The analytical data for this compounds were in excellent agreement with the reported data.<sup>9</sup>

#### ***N*-(2-methylpentan-2-yl)acetamide (2q)**

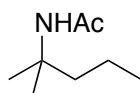

According to the typical procedure, the reaction using HIO<sub>3</sub> (56.5 mg, 0.32 mmol), NHPI (13.2 mg, 0.08 mmol), MeCN (2 mL), and 2-methylpentane (35.2 mg, 0.41 mmol) was conducted at 80 °C for 24 h. Purification by flash column chromatography on silica gel (hexane/EtOAc = 7:3) gave the product as a pale yellow solid (27.6 mg, 47% yield). mp: 46.8–48.0 °C; <sup>1</sup>H NMR (400 MHz, CDCl<sub>3</sub>) δ 5.52 (brs, 1H), 1.91 (s, 3H), 1.74–1.56 (m, 2H), 1.40–1.18 (m, 8H), 0.91 (t, *J* = 7.2 Hz, 3H); <sup>13</sup>C NMR (100 MHz, CDCl<sub>3</sub>) δ 169.4, 53.6, 42.5, 26.8, 24.3, 17.2, 14.3; IR (ATR) 3290, 3085, 1643, 1559 cm<sup>-1</sup>; MS (CI) *m/z* 144 ([M+H]<sup>+</sup>, 100); HRMS: (EI) calcd for (C<sub>8</sub>H<sub>17</sub>NO) 143.1310 (M<sup>+</sup>), found *m/z* 143.1311

### 2,5-diacetamido-2,5-dimethylhexane (2r)

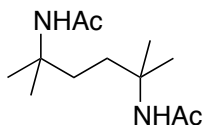

According to the typical procedure, the reaction using HIO<sub>3</sub> (140.7 mg, 0.80 mmol), NHPI (52.0 mg, 0.32 mmol), MeCN (2 mL), and 2,5-dimethylhexane (45.1 mg, 0.39 mmol) was conducted at 80 °C for 24 h. Flash column chromatography on silica gel (hexane/EtOAc = 7:3 then MeOH) gave the product as a solid, which was washed by cold acetone (-40 °C) to give the pure product as a white solid (40.5 mg, 45% yield). mp: 224.8–225.5 °C; <sup>1</sup>H NMR (400 MHz, DMSO-*d*<sub>6</sub>) δ 7.19 (brs, 2H), 1.73 (s, 6H), 1.54 (s, 4H), 1.14 (s, 12H); <sup>13</sup>C NMR (100 MHz, DMSO-*d*<sub>6</sub>) δ 168.7, 52.2, 33.4, 26.8, 23.6; IR (ATR) 3285, 3082, 1641, 1562, 1557 cm<sup>-1</sup>; MS (CI) *m/z* 229 ([M+H]<sup>+</sup>, 100); HRMS: (EI) calcd for (C<sub>12</sub>H<sub>24</sub>N<sub>2</sub>O<sub>2</sub>) 228.1838 (M<sup>+</sup>), found *m/z* 228.1839

### 1,3-diacetamidoadamantane (2s)

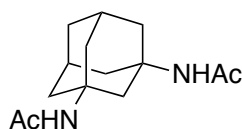

According to the typical procedure, the reaction using HIO<sub>3</sub> (83.2 mg, 0.47 mmol), NHPI (13.3 mg, 0.08 mmol), MeCN (2 mL), and adamantane (55.0 mg, 0.40 mmol) was conducted at 80 °C for 24 h. Purification by flash column chromatography on silica gel (hexane/EtOAc = 6:4 then MeOH) gave the product as a white solid (62.0 mg, 61% yield). mp: 222.3–223.4 °C; <sup>1</sup>H NMR (400 MHz, CDCl<sub>3</sub>) δ 5.22 (brs, 2H), 2.29 (s, 2H), 2.27–2.18 (m, 2H), 2.08–1.80 (m, 14H), 1.65–1.58 (m, 2H); <sup>13</sup>C NMR (100 MHz, CDCl<sub>3</sub>) δ 169.4, 53.0, 44.9, 40.4, 35.1, 29.8, 24.6; IR (ATR) 3287, 3073, 1636, 1549 cm<sup>-1</sup>; MS (CI) *m/z* 251 ([M+H]<sup>+</sup>, 100); HRMS: (CI) calcd for (C<sub>14</sub>H<sub>23</sub>N<sub>2</sub>O<sub>2</sub>) 251.1760 ([M+H]<sup>+</sup>), found *m/z* 251.1756

### 3-methyl-3-propionylaminobutyl benzoate (3)

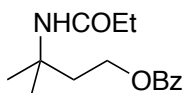

According to the typical procedure, the reaction using HIO<sub>3</sub> (139.7 mg, 0.79 mmol), NHPI (26.4 mg, 0.16 mmol), EtCN (2 mL), and isoamyl benzoate (77.3 mg, 0.40 mmol) was conducted at 80 °C for 24 h. Purification by flash column chromatography on silica gel (hexane/EtOAc = 7:3) gave the product as a yellow viscous liquid (47.5 mg, 46%



yield).  $^1\text{H}$  NMR (400 MHz,  $\text{CDCl}_3$ )  $\delta$  8.02 (d,  $J = 7.6$  Hz, 2H), 7.56 (t,  $J = 7.6$  Hz, 1H), 7.44 (t,  $J = 7.6$  Hz, 2H), 5.55 (brs, 1H), 4.38 (t,  $J = 6.8$  Hz, 2H), 2.28 (t,  $J = 6.8$  Hz, 2H), 2.13 (q,  $J = 7.6$  Hz, 2H), 1.41 (s, 6H), 1.10 (t,  $J = 7.6$  Hz, 3H);  $^{13}\text{C}$  NMR (100 MHz,  $\text{CDCl}_3$ )  $\delta$  173.3, 166.6, 132.9, 130.1, 129.4, 128.3, 61.8, 52.5, 37.8, 30.3, 27.5, 9.7; IR (ATR) 3306, 3067, 1717, 1647, 1541  $\text{cm}^{-1}$ ; MS (CI)  $m/z$  264 ( $[\text{M}+\text{H}]^+$ , 30); HRMS: (CI) calcd for ( $\text{C}_{15}\text{H}_{22}\text{NO}_3$ ) 264.1600 ( $[\text{M}+\text{H}]^+$ ), found  $m/z$  264.1597

### 3-benzamido-3-methylbutyl benzoate (4)

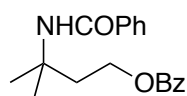

According to the typical procedure, the reaction using  $\text{HIO}_3$  (140.5 mg, 0.80 mmol), NHPI (26.4 mg, 0.16 mmol), PhCN (2 mL), and isoamyl benzoate (76.7 mg, 0.40 mmol) was conducted at 80  $^\circ\text{C}$  for 24 h. Purification by flash column chromatography on silica gel (hexane/EtOAc = 7:3) gave the product as a white solid (64.0 mg, 52% yield). mp: 99.8–100.8  $^\circ\text{C}$ ;  $^1\text{H}$  NMR (400 MHz,  $\text{CDCl}_3$ )  $\delta$  7.98 (d,  $J = 7.6$  Hz, 2H), 7.71 (d,  $J = 7.2$  Hz, 2H), 7.53 (t,  $J = 7.6$  Hz, 1H), 7.45 (t,  $J = 7.2$  Hz, 1H), 7.41–7.30 (m, 4H), 6.27 (brs, 1H), 4.46 (t,  $J = 6.4$  Hz, 2H), 2.37 (t,  $J = 6.4$  Hz, 2H), 1.54 (s, 6H);  $^{13}\text{C}$  NMR (100 MHz,  $\text{CDCl}_3$ )  $\delta$  167.0, 166.6, 135.4, 132.9, 131.2, 130.0, 129.5, 128.4, 128.3, 126.7, 61.9, 53.2, 38.3, 27.4; IR (ATR) 3358, 3063, 1719, 1639, 1539  $\text{cm}^{-1}$ ; MS (CI)  $m/z$  312 ( $[\text{M}+\text{H}]^+$ , 65); HRMS: (CI) calcd for ( $\text{C}_{19}\text{H}_{22}\text{NO}_3$ ) 312.1600 ( $[\text{M}+\text{H}]^+$ ), found  $m/z$  312.1596

### 3-hydroxy-1,1-dimethyl-propylamine hydrochloride (5)

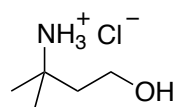

$^1\text{H}$  NMR (400 MHz,  $\text{DMSO}-d_6$ )  $\delta$  8.06 (brs, 3H), 4.83 (brs, 1H), 3.53 (t,  $J = 6.8$  Hz, 2H), 1.72 (t,  $J = 6.8$  Hz, 2H), 1.24 (s, 6H);  $^{13}\text{C}$  NMR (100 MHz,  $\text{DMSO}-d_6$ )  $\delta$  56.4, 53.0, 41.5, 25.3

## 15. References

- (1) Hoshikawa, T.; Yoshioka, S.; Kamijo, S.; Inoue, M. *Synthesis* **2013**, 45, 0874.
- (2) Guo, S.; Zhang, X.; Tang, P. *Angew. Chem. Int. Ed.* **2015**, 54, 4065.
- (3) Norris, J. F.; Rigby, G. W. *J. Am. Chem. Soc.* **1932**, 54, 2088.

- (4) Pereira, G. R.; Brandao, G. C.; Arantes, L. M.; de Oliveira, H. A.; de Paula, R. C.; do Nascimento, M. F. A.; dos Santos, F. M.; da Rocha, R. K.; Lopes, J. C. D.; de Oliveira, A. B. *Eur. J. Med. Chem.* **2014**, *73*, 295.
- (5) Nickels, M.; Xie, J.; Cobb, J.; Gore, J. C.; Pham, W. *J. Mater. Chem.* **2010**, *20*, 4776.
- (6) Brown, J. R.; North, E. J.; Hurdle, J. G.; Morisseau, C.; Scarborough, J. S.; Sun, D.; Korduláková, J.; Scherman, M. S.; Jones V.; Grzegorzewicz, A.; Crew, R. M.; Jackson, M.; Mcneil, M. R.; Lee, R. E. *Bioorg. Med. Chem.* **2011**, *19*, 5585.
- (7) Fung, Y.; Yan, S.; Wong, M. *Org. Biomol. Chem.* **2012**, *10*, 3122.
- (8) Li, X.; Che, X.; Chen, G.; Zhang, J.; Yan, J.; Zhang, Y.; Zhang, L.; Hsu, C.; Gao, Y. Q.; Shi, Z. *Org. Lett.* **2016**, *18*, 1234.
- (9) Kalkhambkar, R. G.; Waters, S. N.; Laali, K. K. *Tetrahedron Lett.* **2011**, *52*, 867.

## 16. NMR spectra

### 4-methylpentyl benzoate (1c)

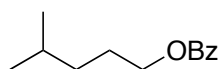

$^1\text{H}$  NMR: (400 MHz,  $\text{CDCl}_3$ )

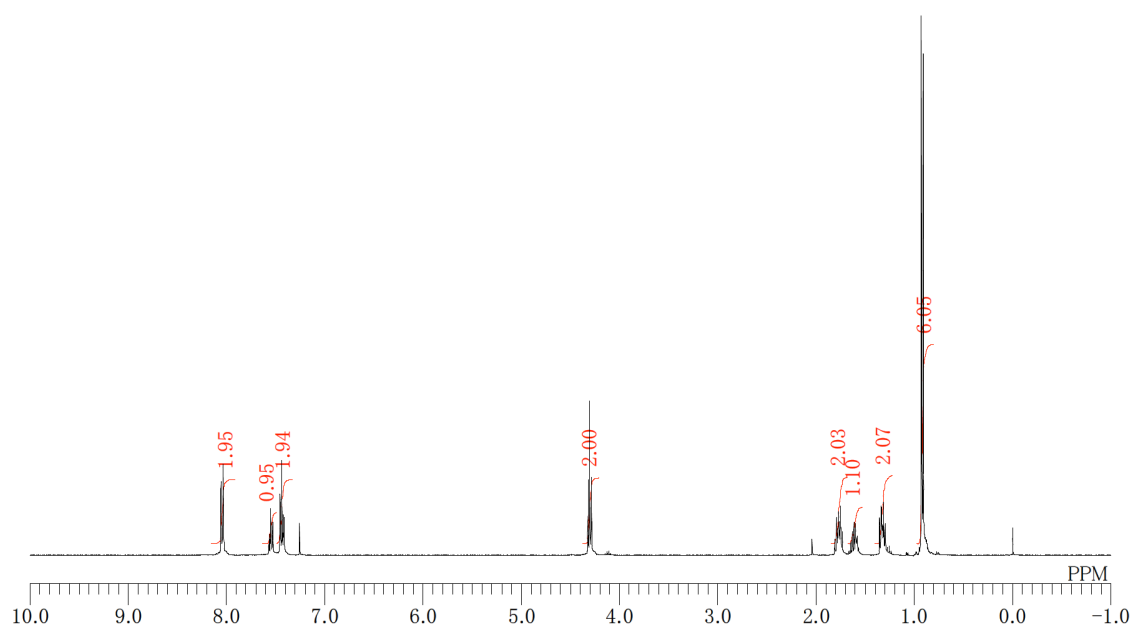

$^{13}\text{C}$  NMR: (100 MHz,  $\text{CDCl}_3$ )

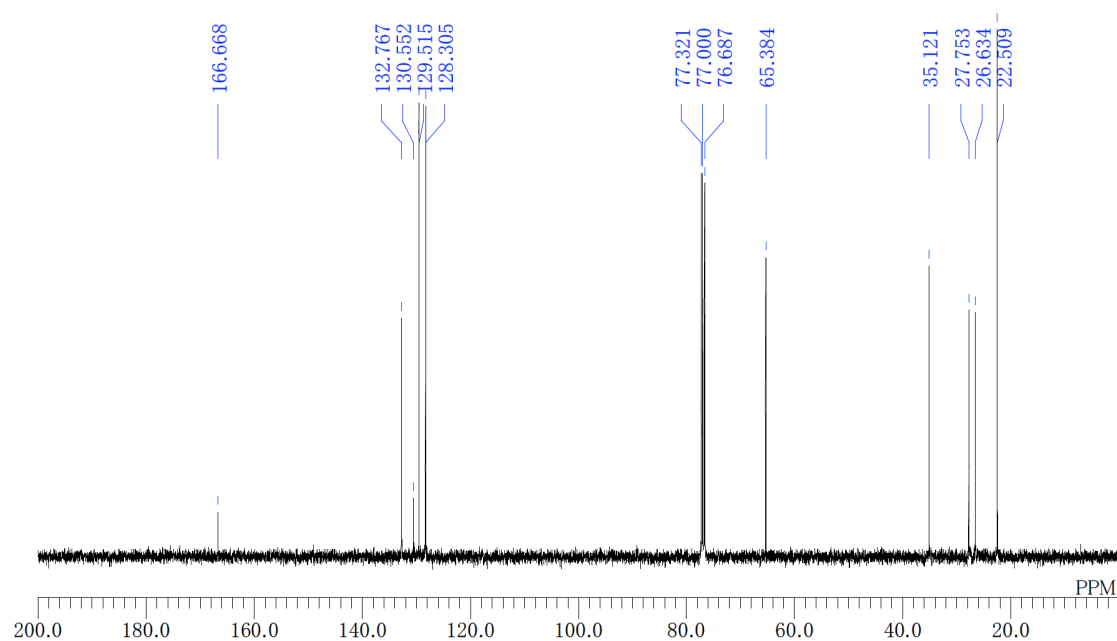

**2,5-dimethylhexan-2-yl benzoate (1e)**

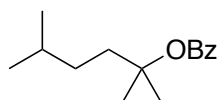

$^1\text{H}$  NMR: (400 MHz,  $\text{CDCl}_3$ )

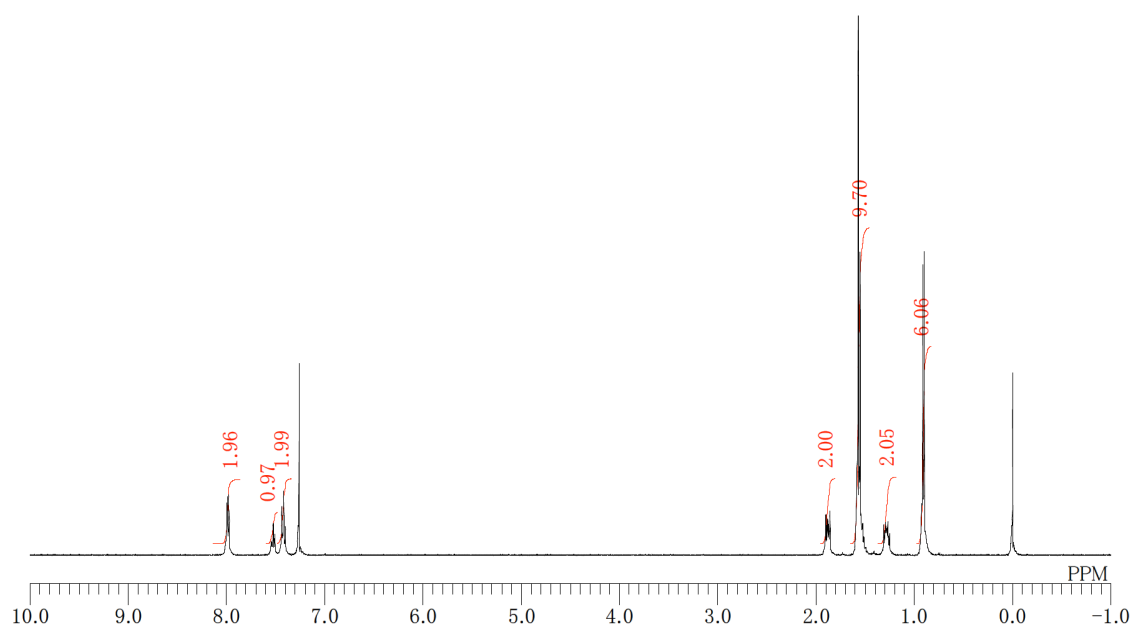

$^{13}\text{C}$  NMR: (100 MHz,  $\text{CDCl}_3$ )

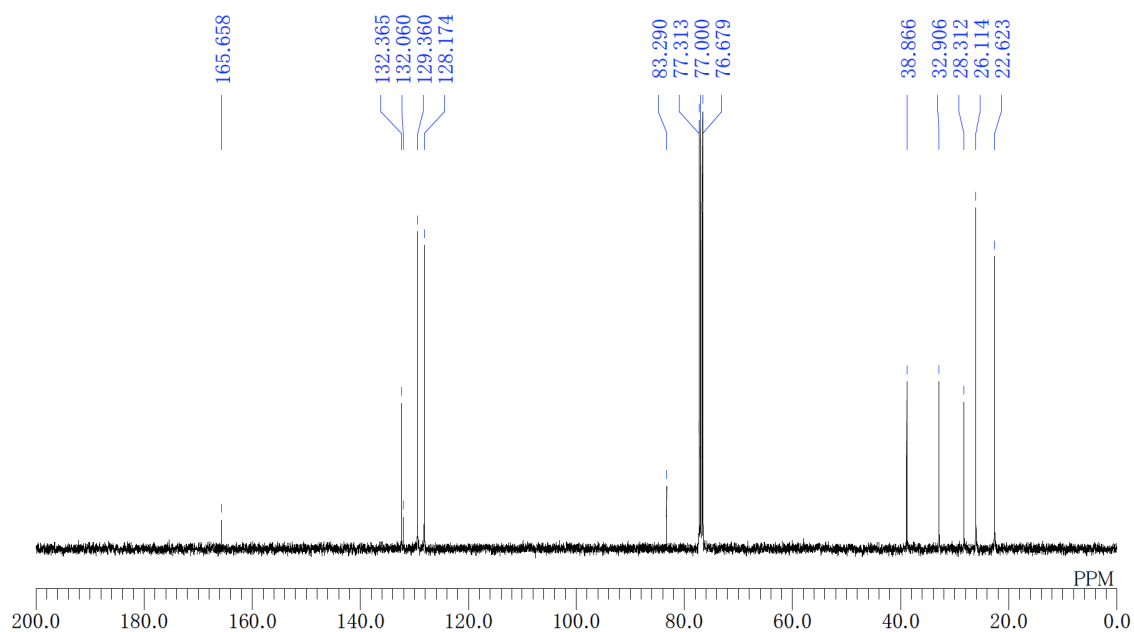

**isoamyl 4-nitrophenyl ether (1n)**

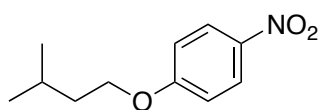

$^1\text{H}$  NMR: (400 MHz,  $\text{CDCl}_3$ )

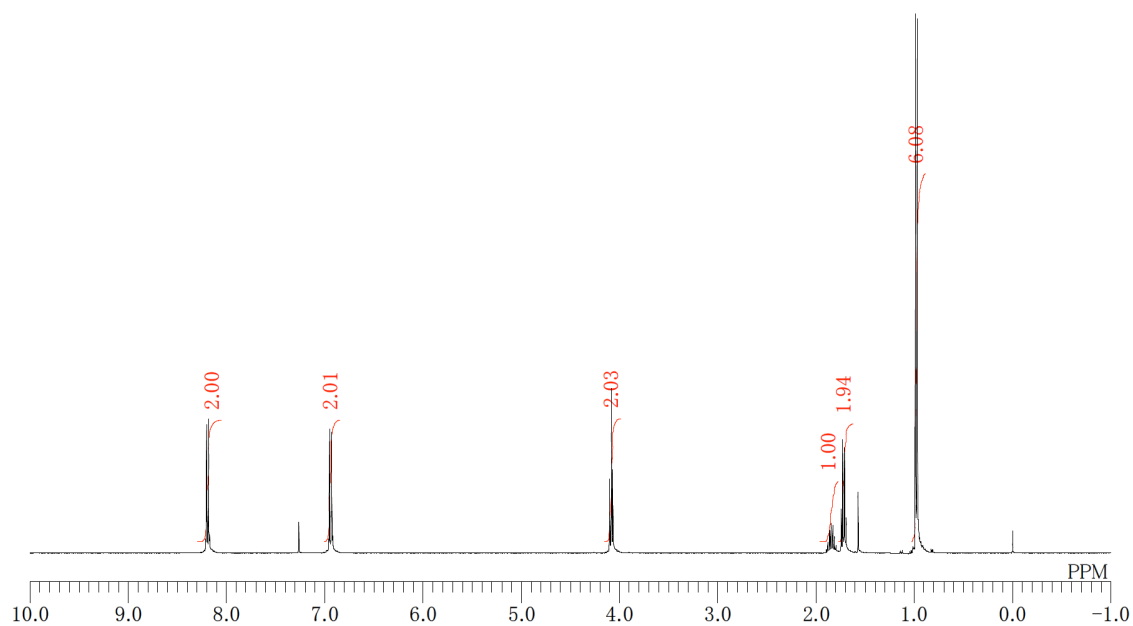

$^{13}\text{C}$  NMR: (100 MHz,  $\text{CDCl}_3$ )

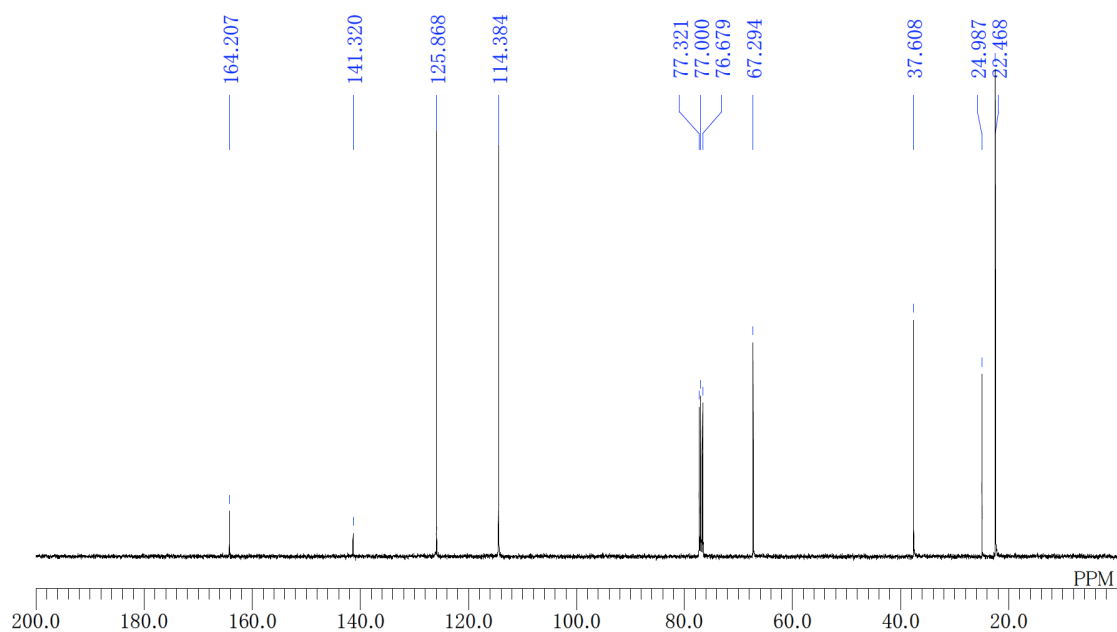

**3-acetamido-3-methylbutyl benzoate (2a)**

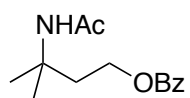

$^1\text{H}$  NMR: (400 MHz,  $\text{CDCl}_3$ )

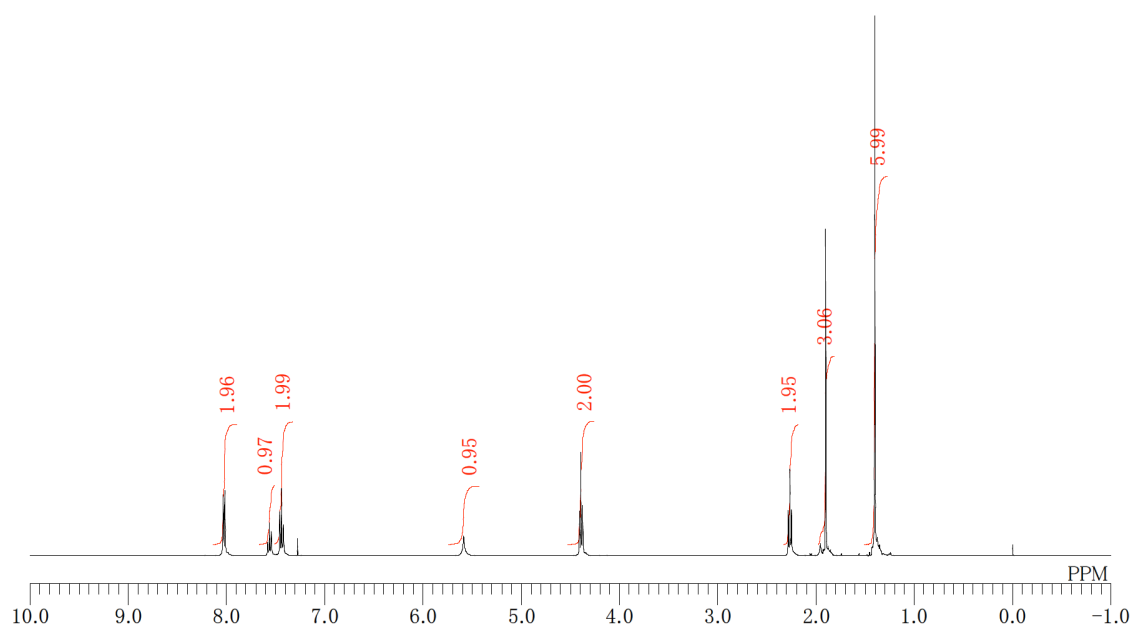

$^{13}\text{C}$  NMR: (100 MHz,  $\text{CDCl}_3$ )

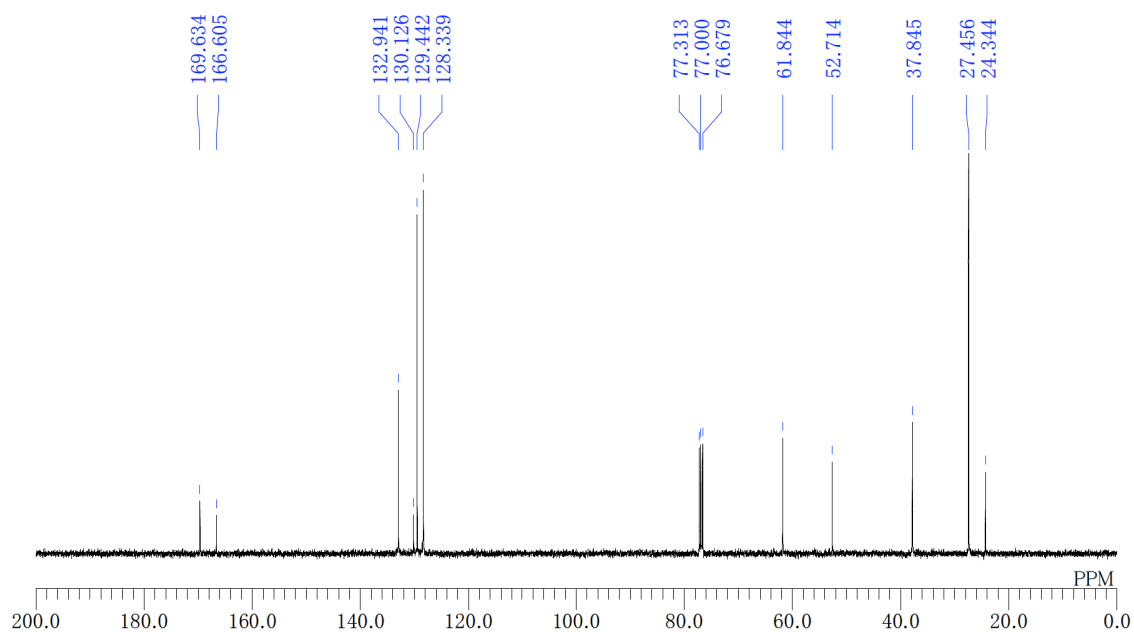

**2-acetamido-2-methylpentyl benzoate (2b)**

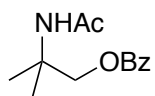

$^1\text{H}$  NMR: (400 MHz,  $\text{CDCl}_3$ )

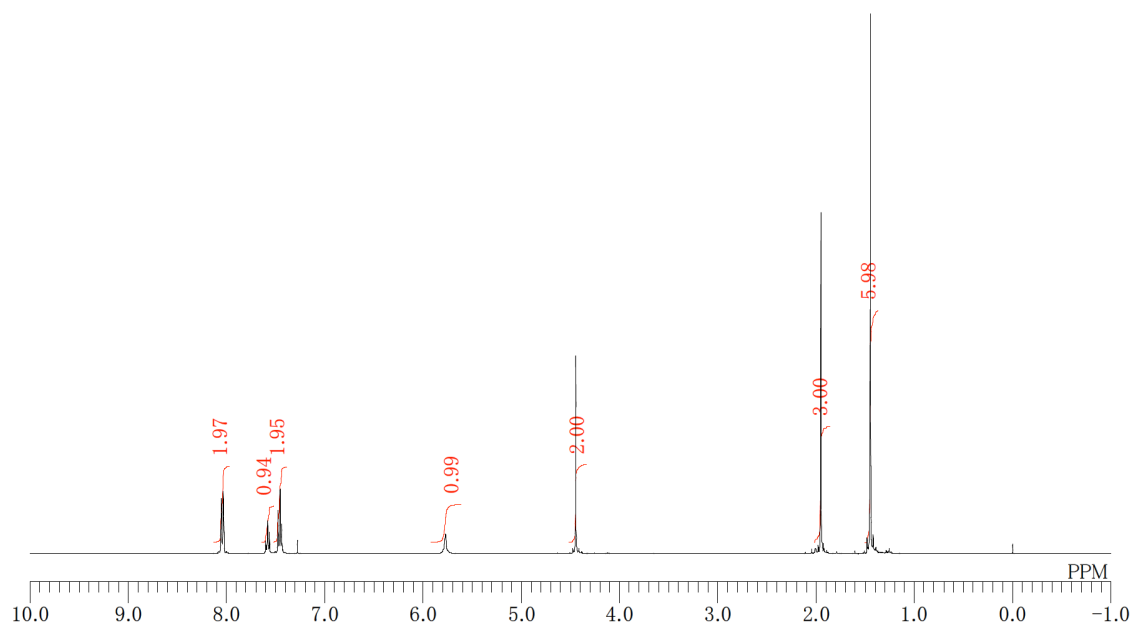

$^{13}\text{C}$  NMR: (100 MHz,  $\text{CDCl}_3$ )

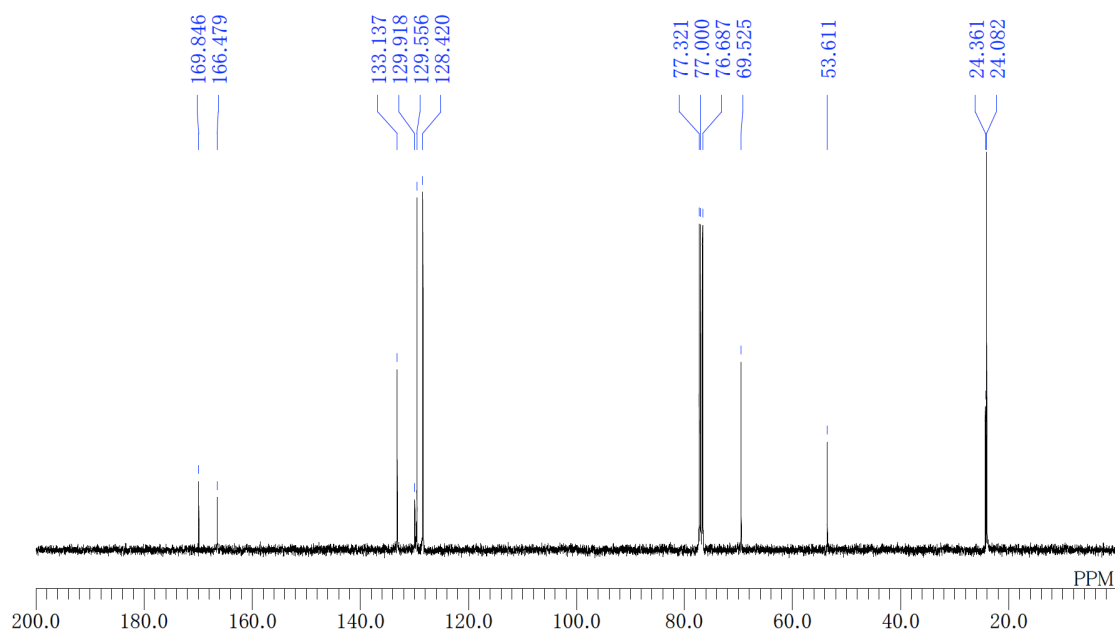

**4-acetamido-4-methylpentyl benzoate (2c)**

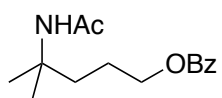

$^1\text{H}$  NMR: (400 MHz,  $\text{CDCl}_3$ )

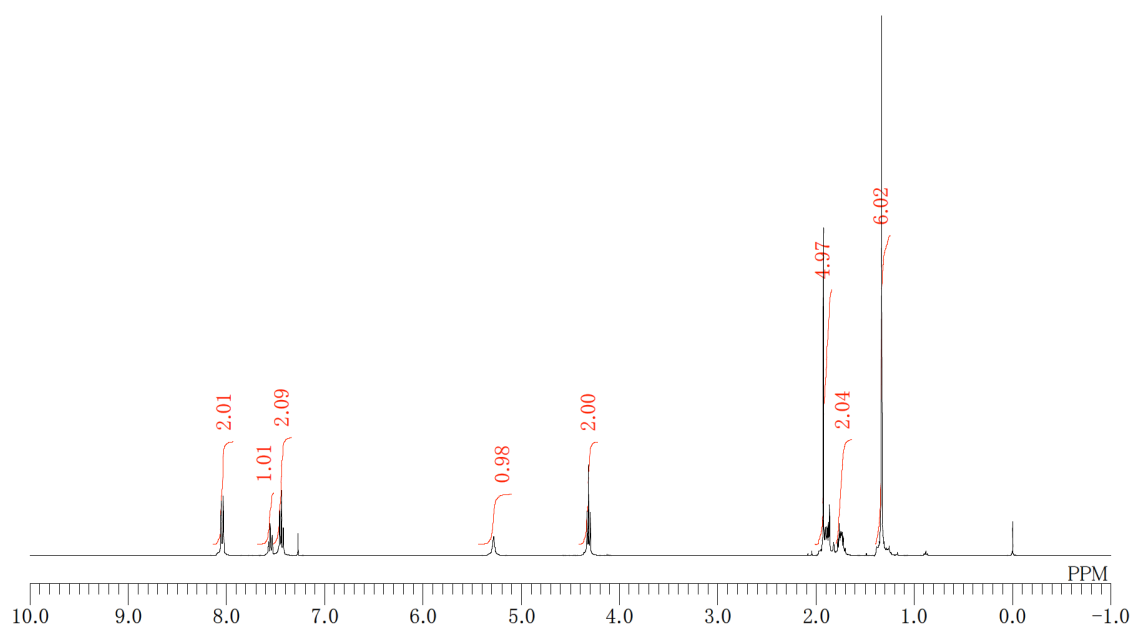

$^{13}\text{C}$  NMR: (100 MHz,  $\text{CDCl}_3$ )

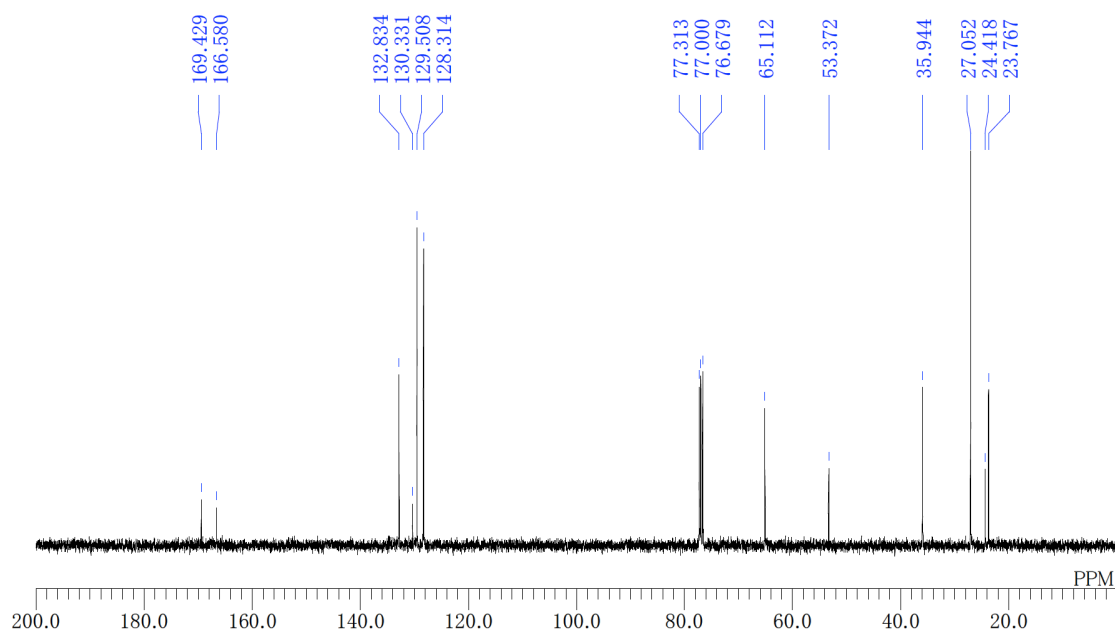



**5-acetamido-5-methylhexan-2-yl benzoate (2d)**

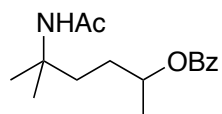

$^1\text{H}$  NMR: (400 MHz,  $\text{CDCl}_3$ )

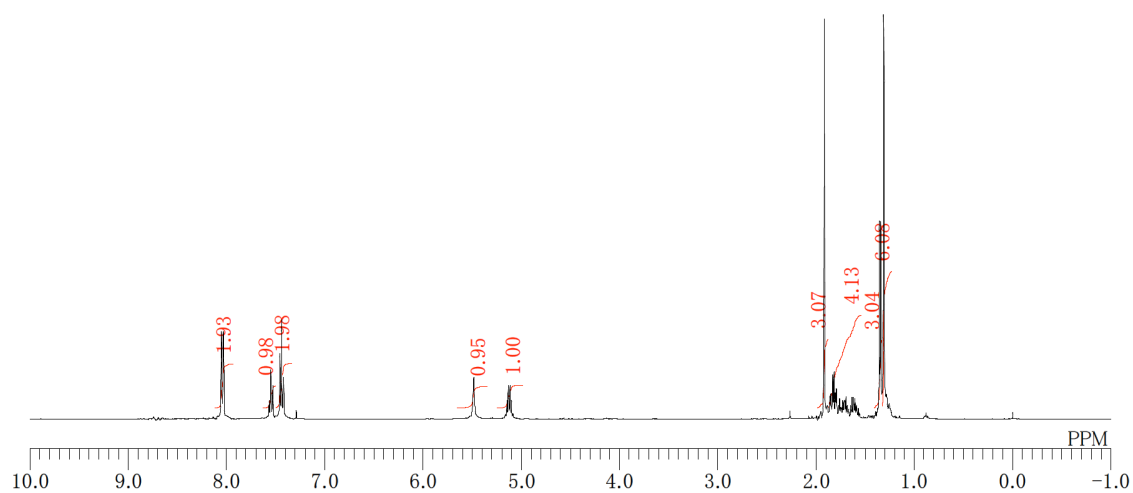

$^{13}\text{C}$  NMR: (100 MHz,  $\text{CDCl}_3$ )

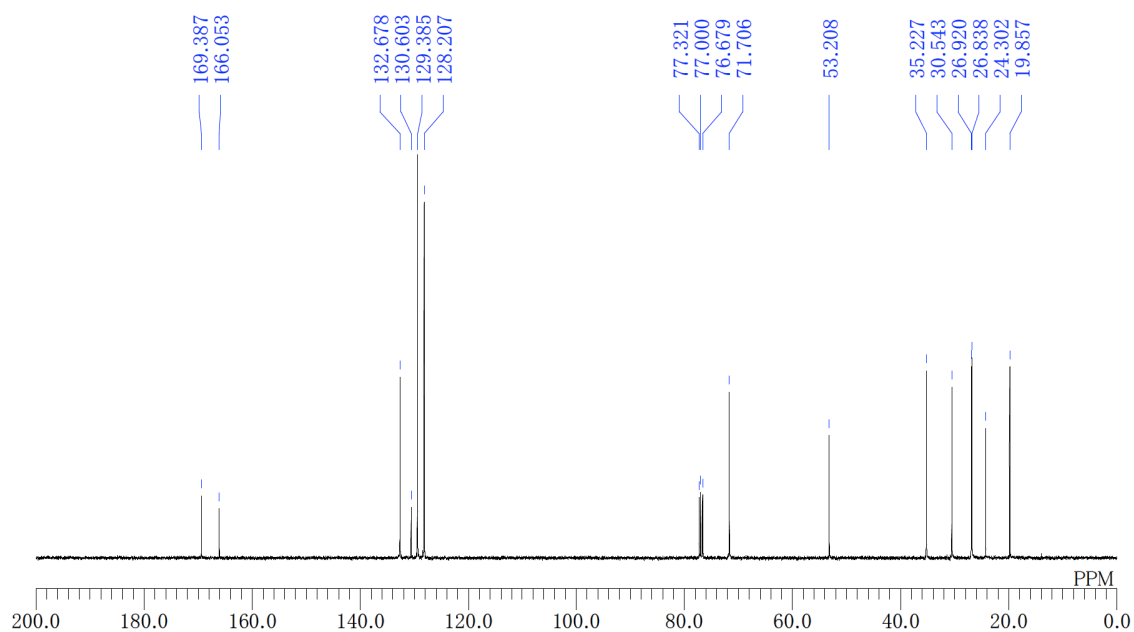

**5-acetamido-2,5-dimethylhexan-2-yl benzoate (2e)**

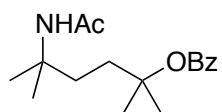

$^1\text{H}$  NMR: (400 MHz,  $\text{CDCl}_3$ )

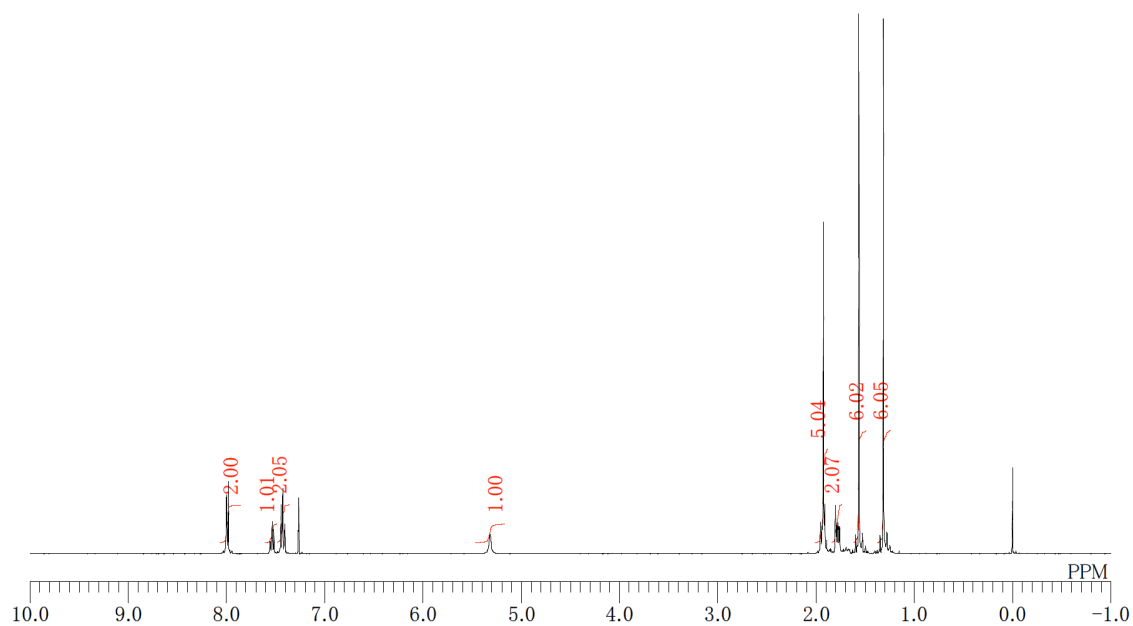

$^{13}\text{C}$  NMR: (100 MHz,  $\text{CDCl}_3$ )

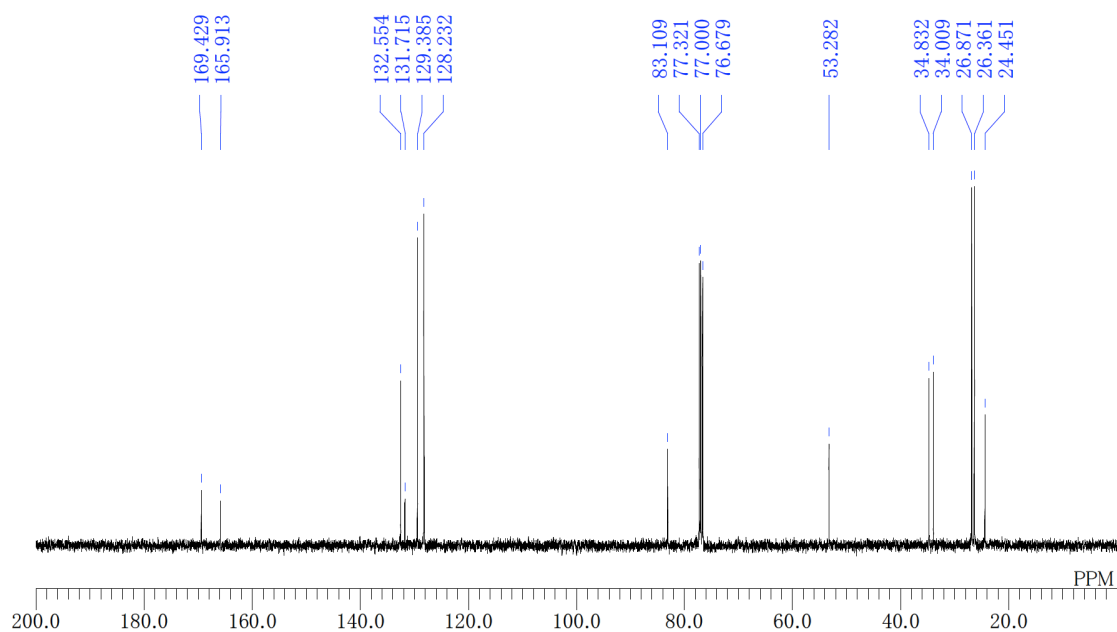

**3-acetamido-3-methylpentyl benzoate (2f)**

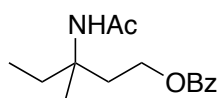

$^1\text{H}$  NMR: (400 MHz,  $\text{CDCl}_3$ )

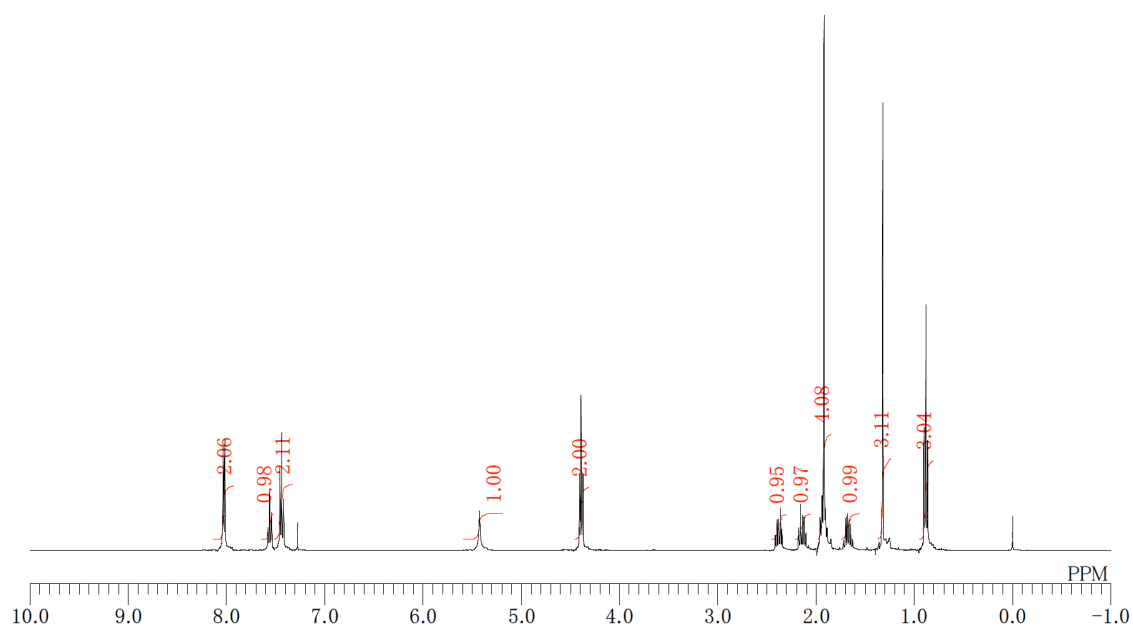

$^{13}\text{C}$  NMR: (100 MHz,  $\text{CDCl}_3$ )

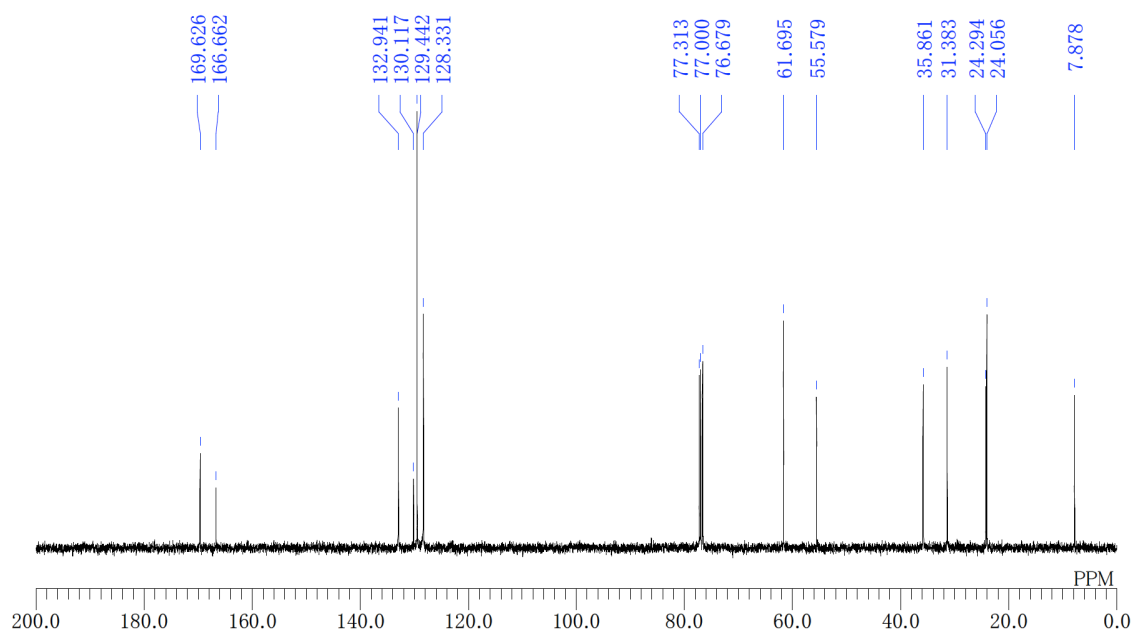

**7-acetamido-3,7-dimethyloctyl benzoate (2g)**

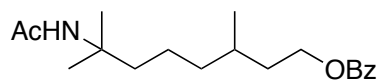

$^1\text{H}$  NMR: (400 MHz,  $\text{CDCl}_3$ )

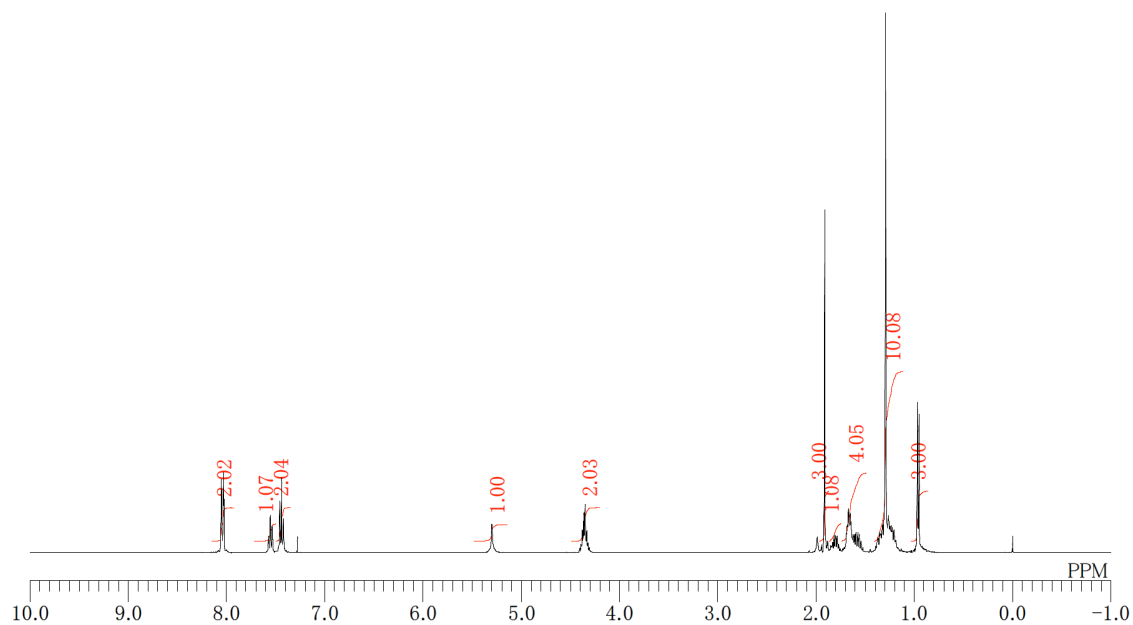

$^{13}\text{C}$  NMR: (100 MHz,  $\text{CDCl}_3$ )

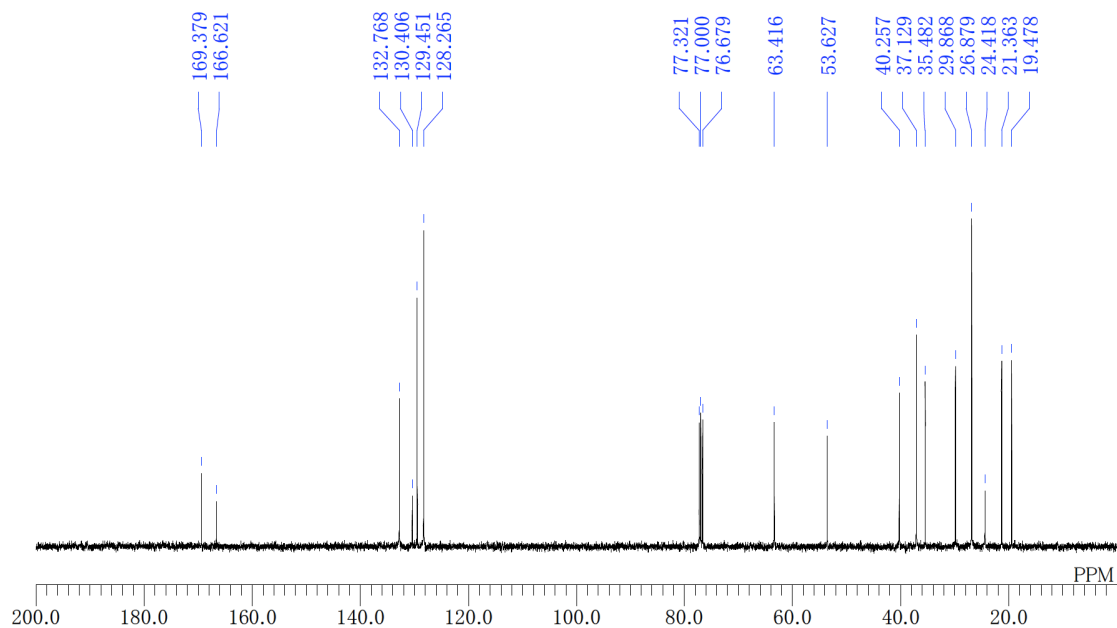

**3-acetamido-3,7-dimethyloctyl benzoate**

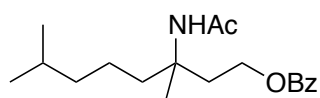

$^1\text{H}$  NMR: (400 MHz,  $\text{CDCl}_3$ )

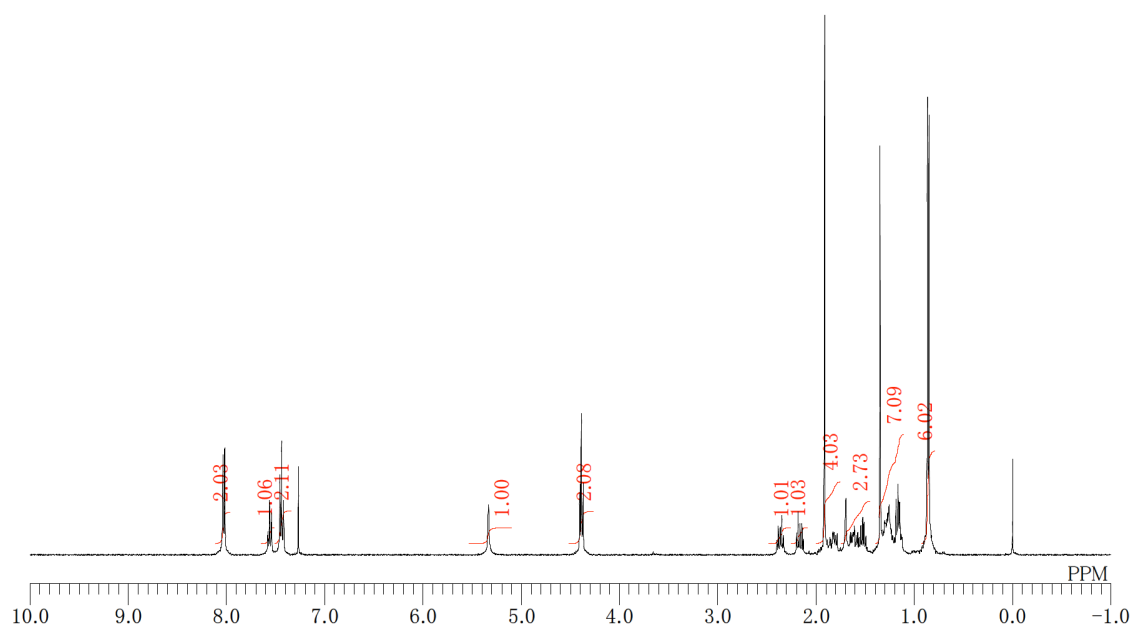

$^{13}\text{C}$  NMR: (100 MHz,  $\text{CDCl}_3$ )

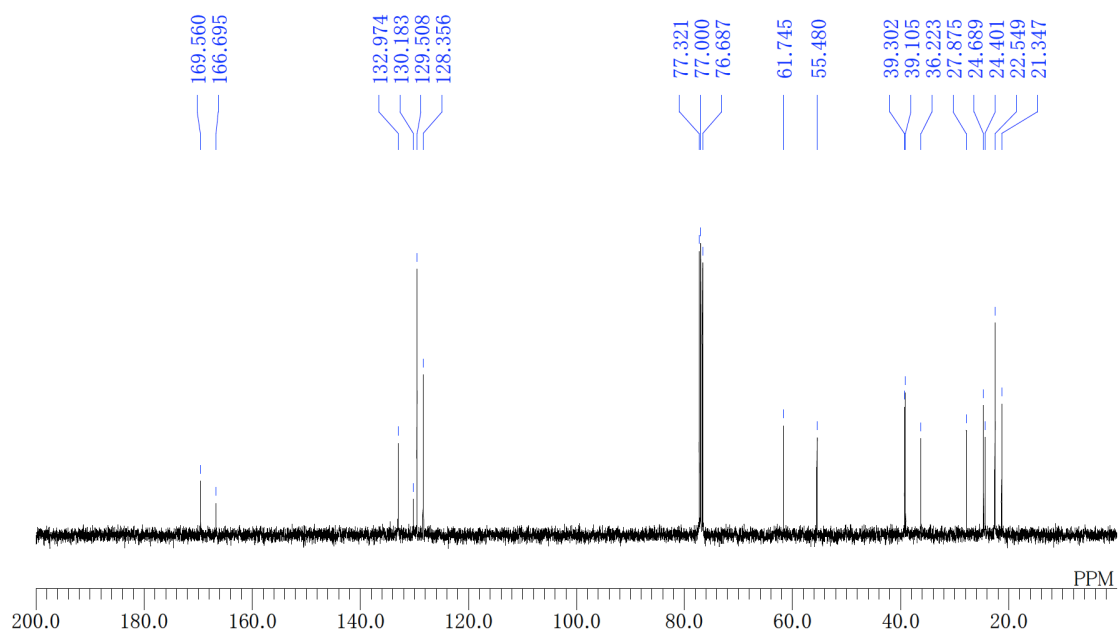

**3-acetamido-3-methylbutyl acetate (2h)**

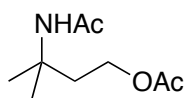

$^1\text{H}$  NMR: (400 MHz,  $\text{CDCl}_3$ )

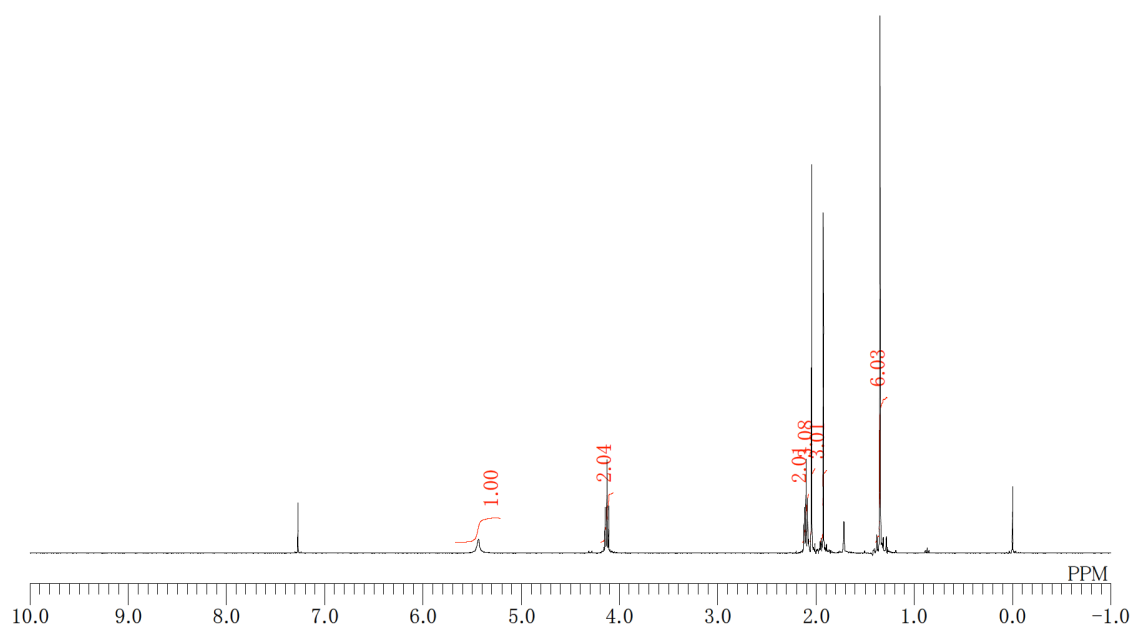

$^{13}\text{C}$  NMR: (100 MHz,  $\text{CDCl}_3$ )

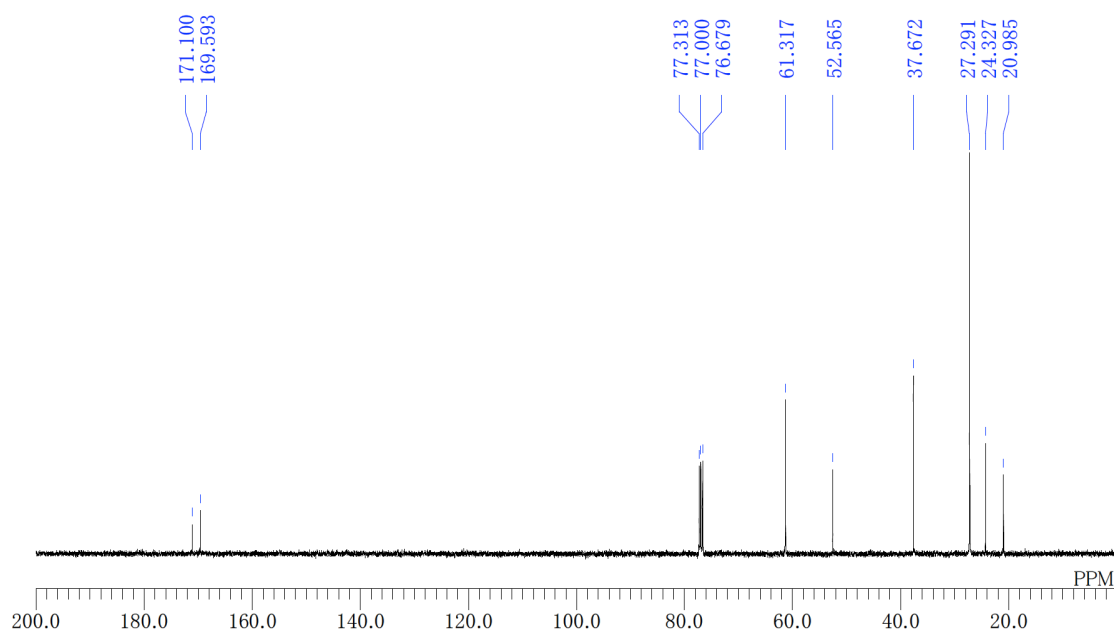

**ethyl 3-acetamido-3-methylbutanoate (2i)**

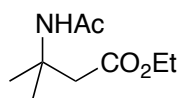

$^1\text{H}$  NMR: (400 MHz,  $\text{CDCl}_3$ )

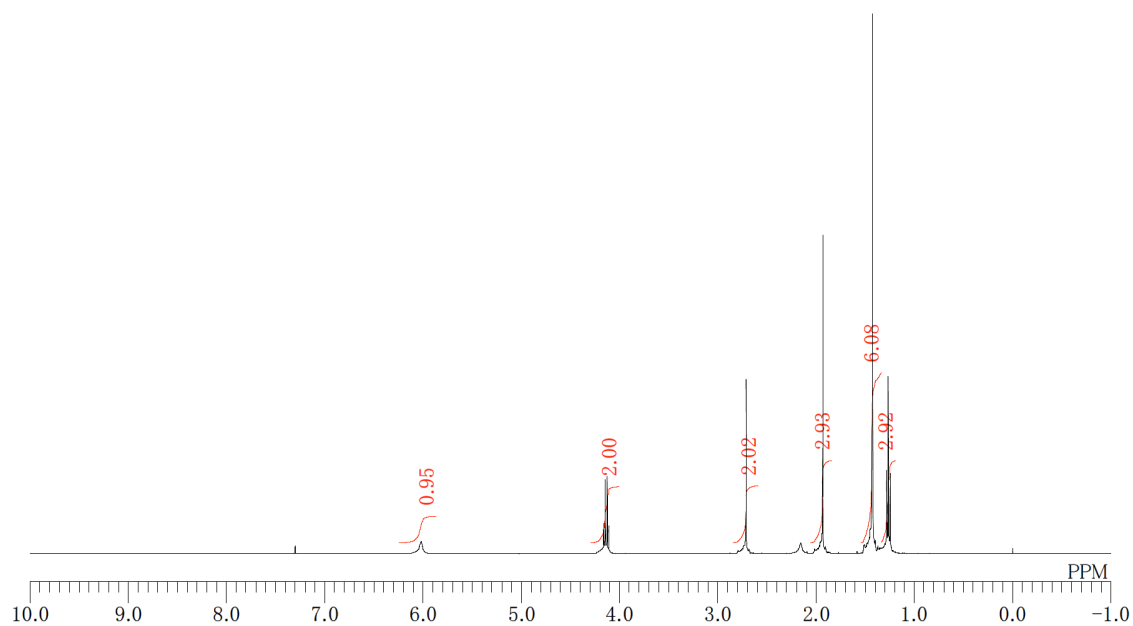

$^{13}\text{C}$  NMR: (100 MHz,  $\text{CDCl}_3$ )

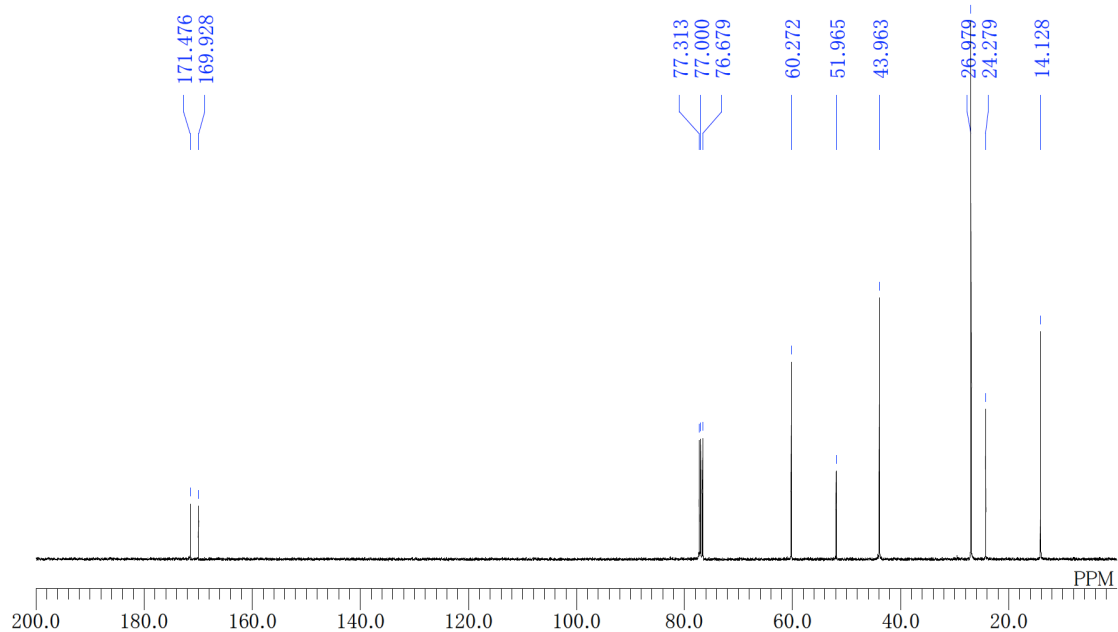

**4-acetamido-4-methylpentanonitrile (2j)**

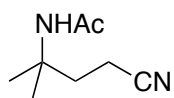

$^1\text{H}$  NMR: (400 MHz,  $\text{CDCl}_3$ )

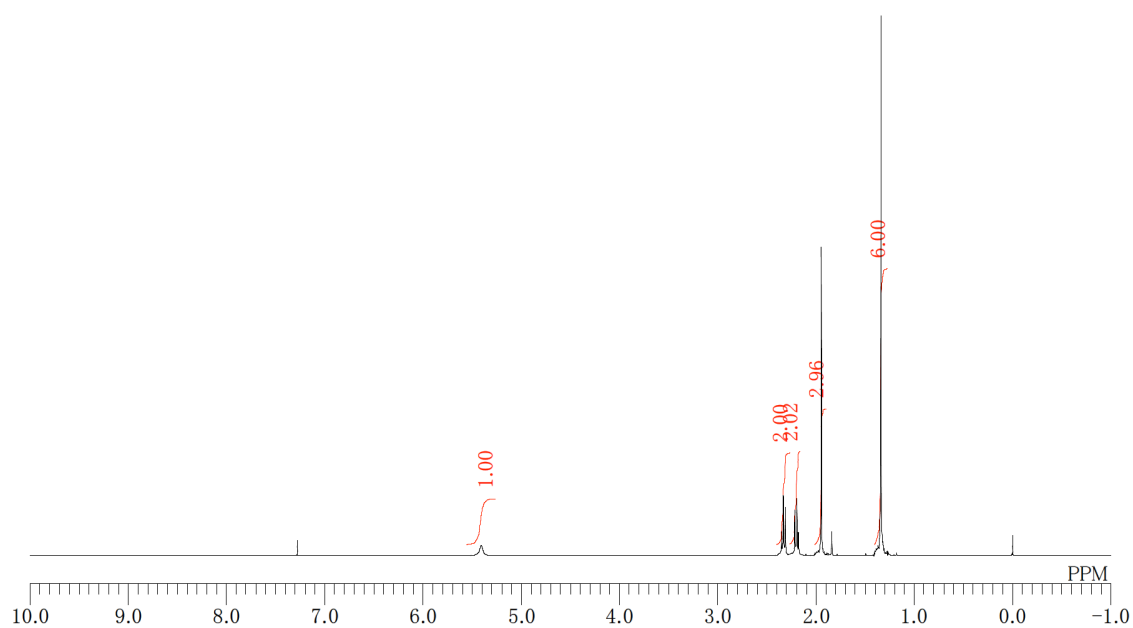

$^{13}\text{C}$  NMR: (100 MHz,  $\text{CDCl}_3$ )

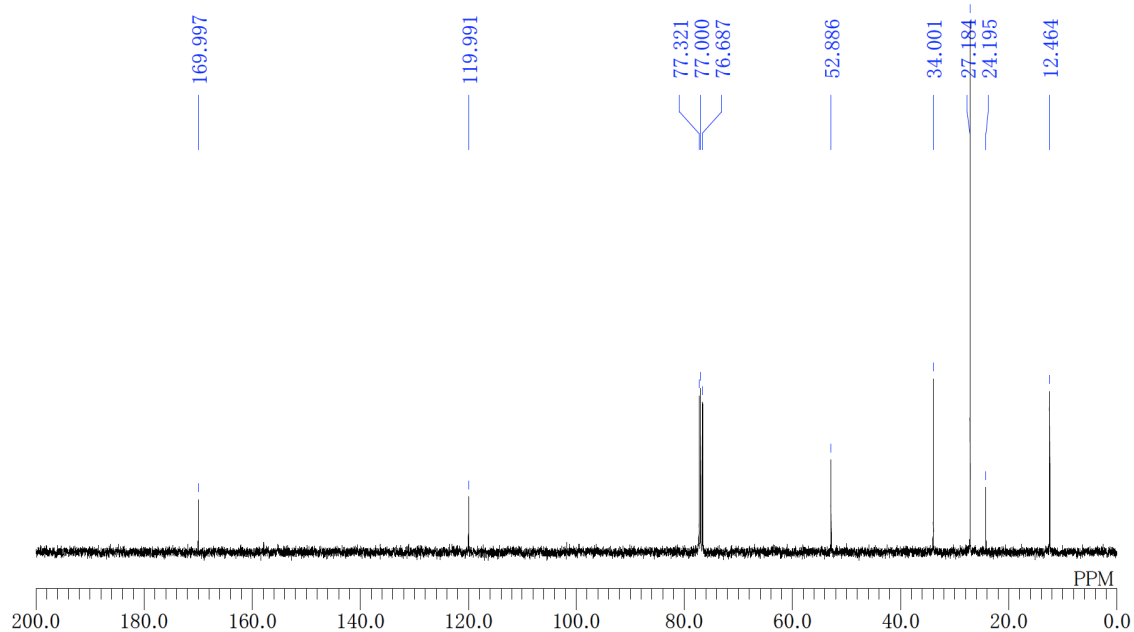



***N*-phthaloyl-3-acetamido-3-methylbutylamine (2k)**

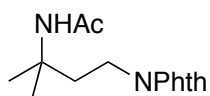

$^1\text{H}$  NMR: (400 MHz,  $\text{CDCl}_3$ )

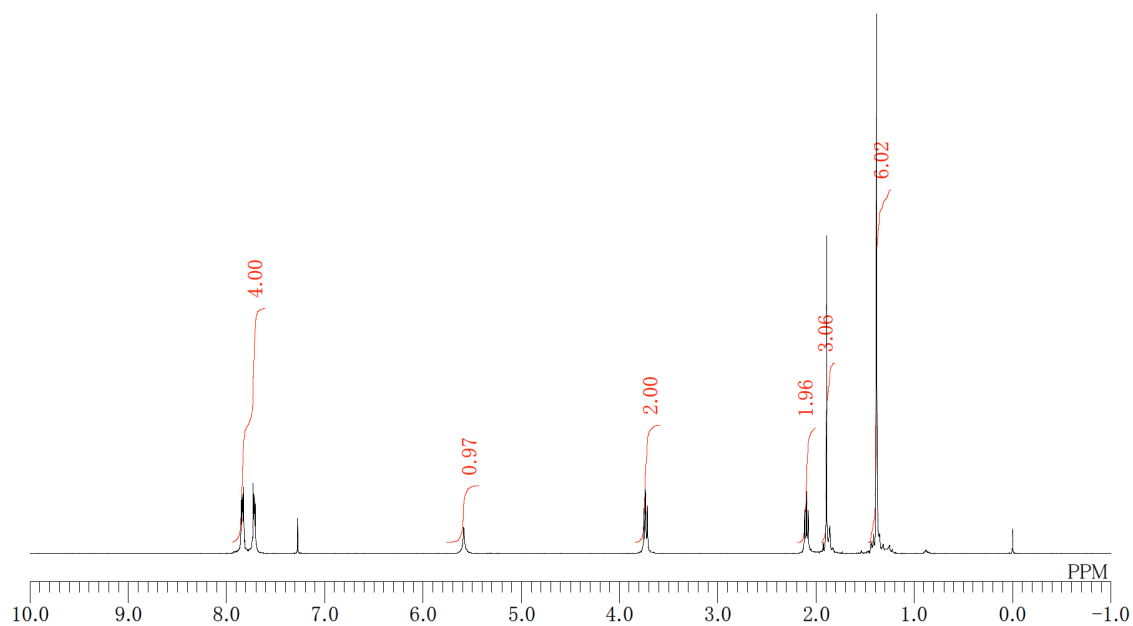

$^{13}\text{C}$  NMR: (100 MHz,  $\text{CDCl}_3$ )

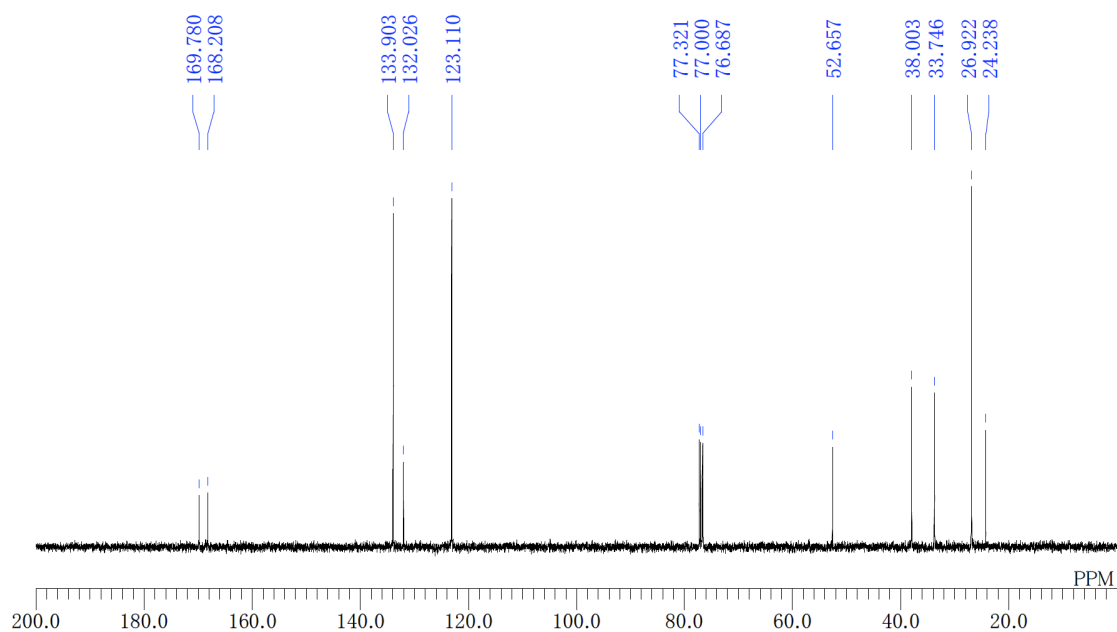

***N*-phthaloyl-6-acetamido-6-methylheptan-2-amine (2l)**

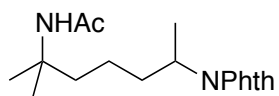

$^1\text{H}$  NMR: (400 MHz,  $\text{CDCl}_3$ )

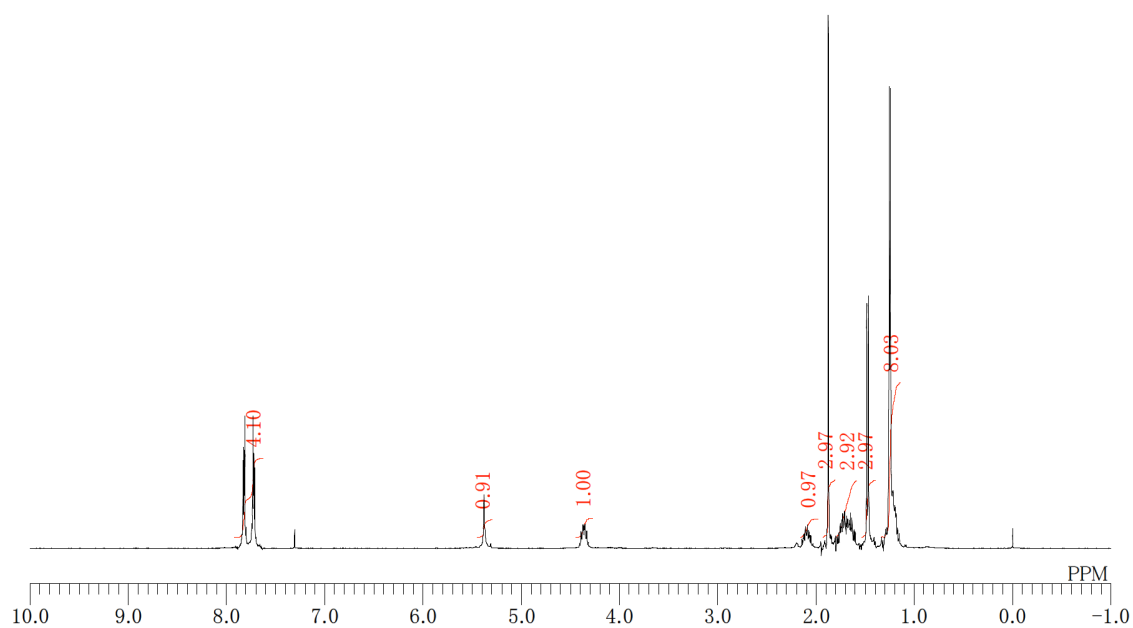

$^{13}\text{C}$  NMR: (100 MHz,  $\text{CDCl}_3$ )

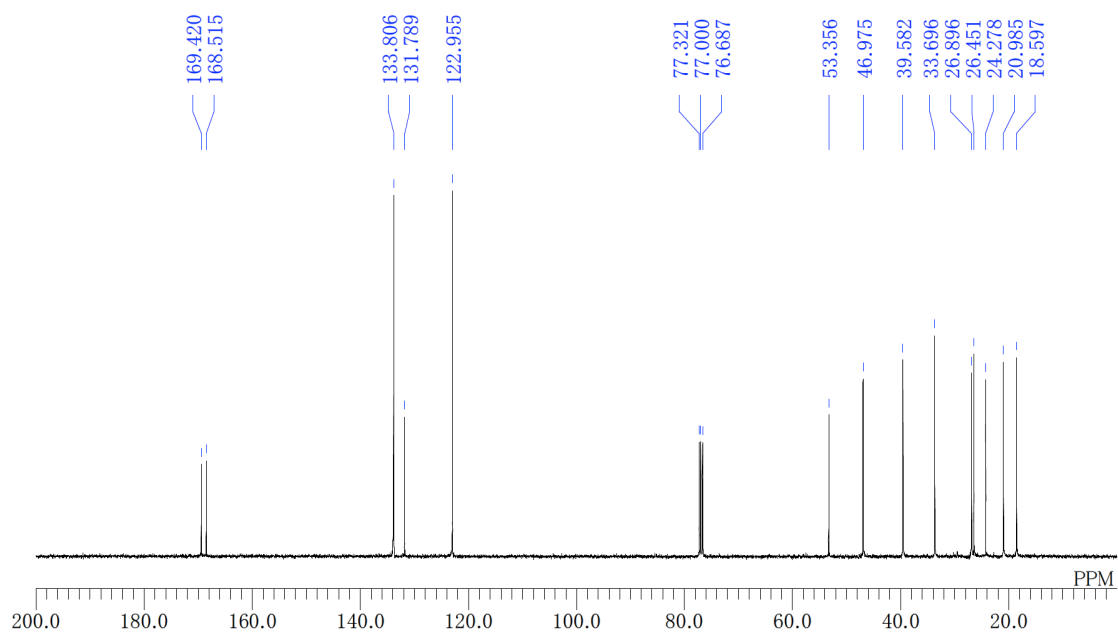

***N*-phthaloyl-4-acetamido-*L*-leucine methyl ester (2m)**

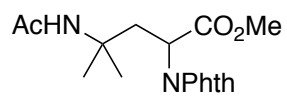

$^1\text{H}$  NMR: (400 MHz,  $\text{CDCl}_3$ )

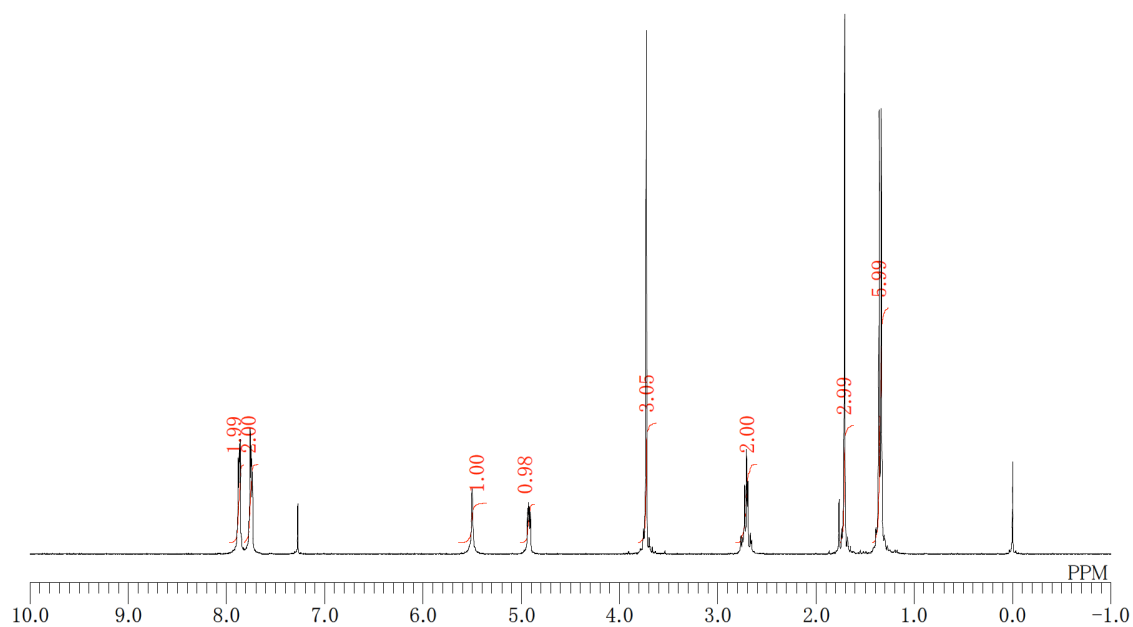

$^{13}\text{C}$  NMR: (100 MHz,  $\text{CDCl}_3$ )

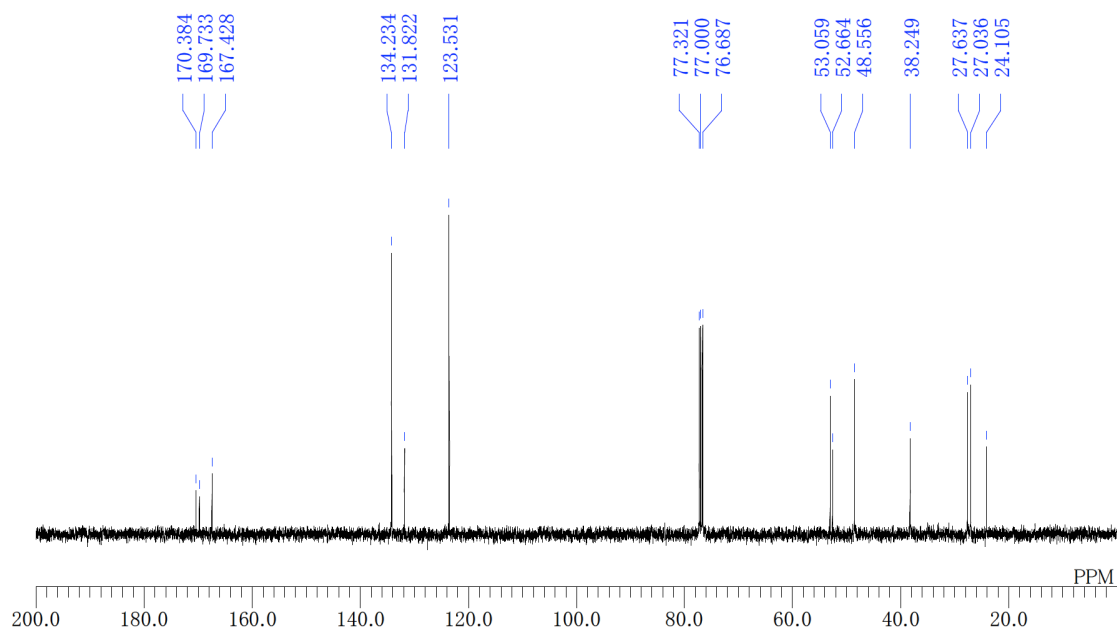

**4-nitrophenyl 2-acetamido-2-methylbutan-2-yl ether (2n)**

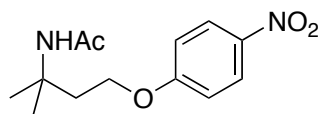

$^1\text{H}$  NMR: (400 MHz,  $\text{CDCl}_3$ )

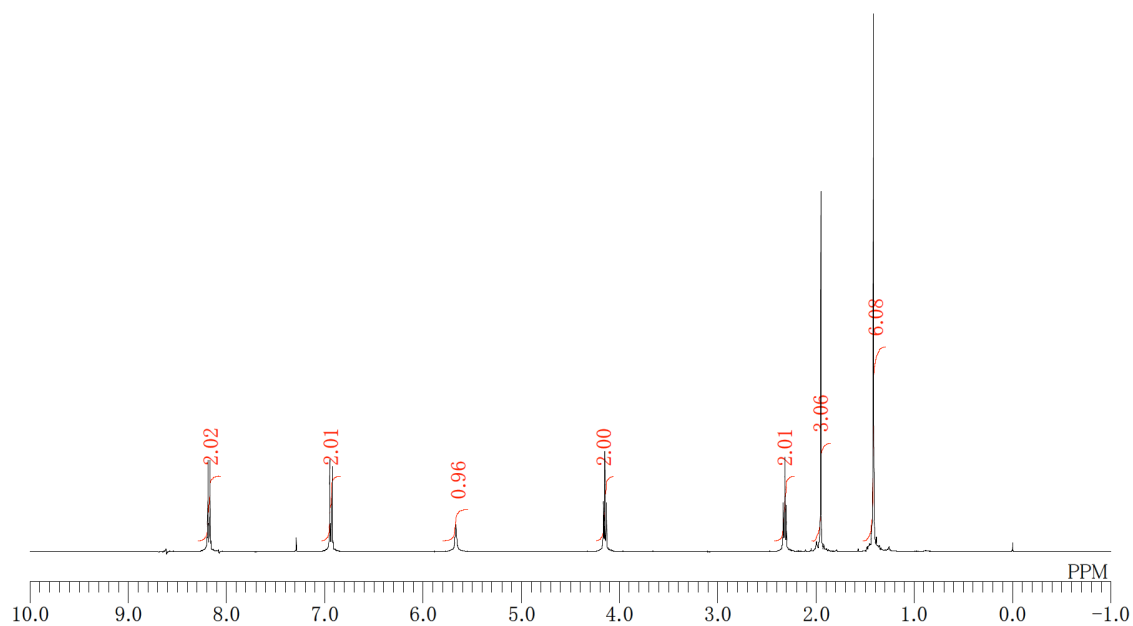

$^{13}\text{C}$  NMR: (100 MHz,  $\text{CDCl}_3$ )

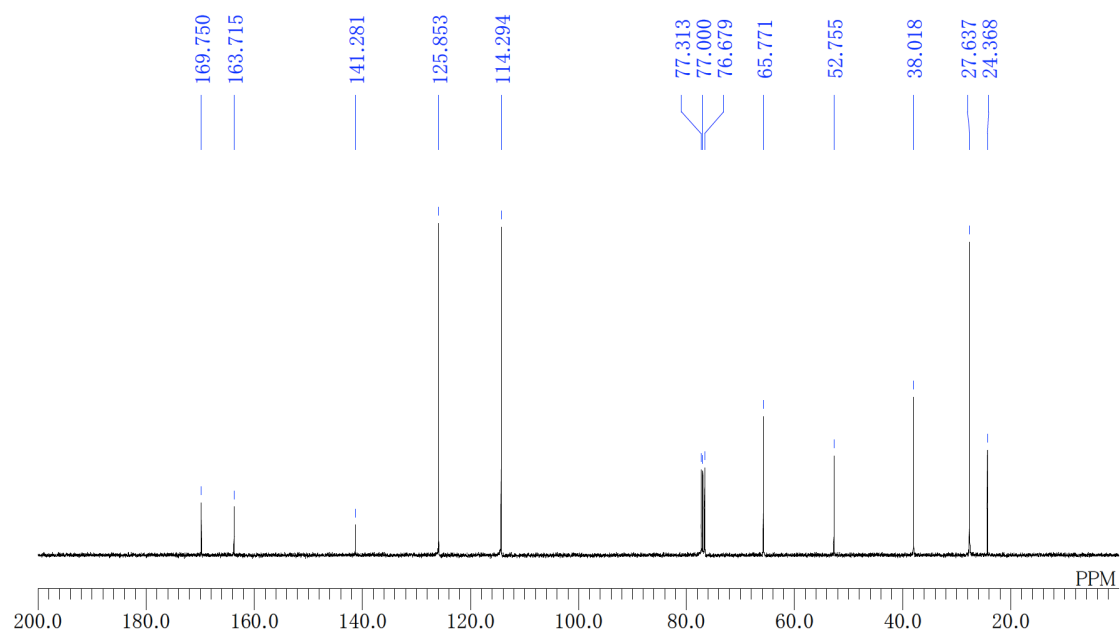

***N*-(1-methylcyclohexyl)acetamide (2o)**

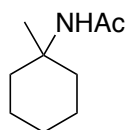

$^1\text{H}$  NMR: (400 MHz,  $\text{CDCl}_3$ )

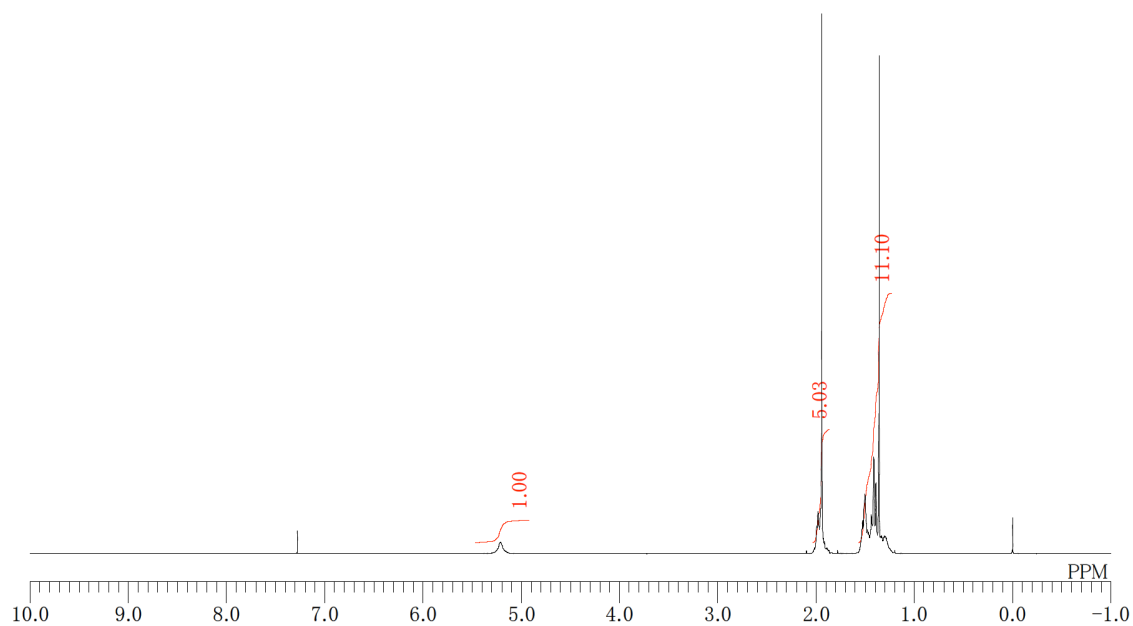

$^{13}\text{C}$  NMR: (100 MHz,  $\text{CDCl}_3$ )

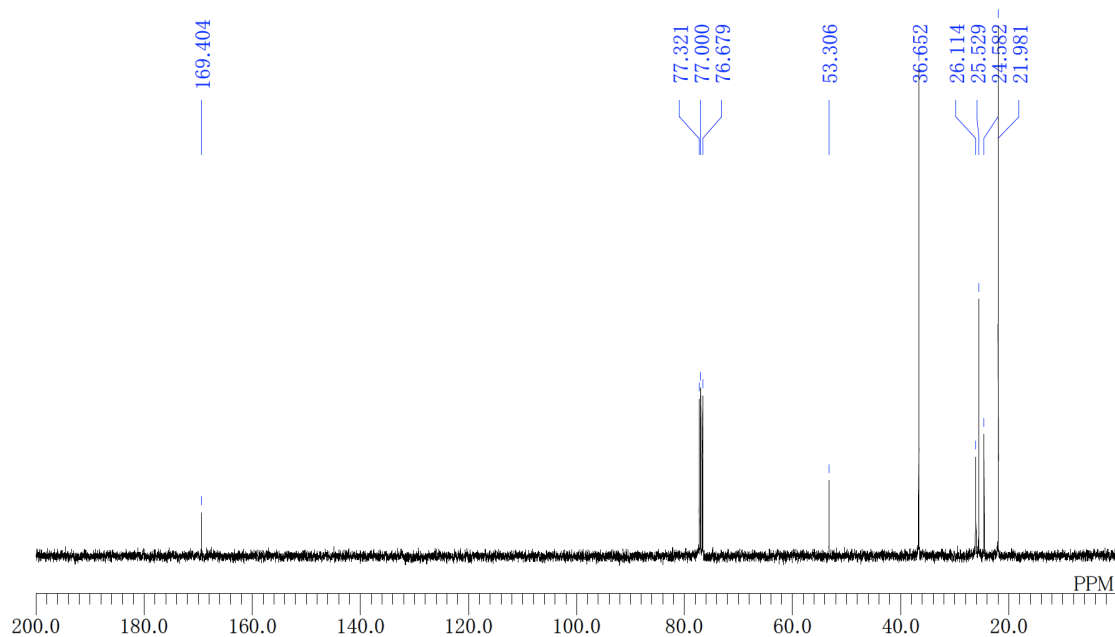

***N*-(1-methylcyclopentyl)acetamide (2p)**

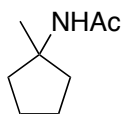

$^1\text{H}$  NMR: (400 MHz,  $\text{CDCl}_3$ )

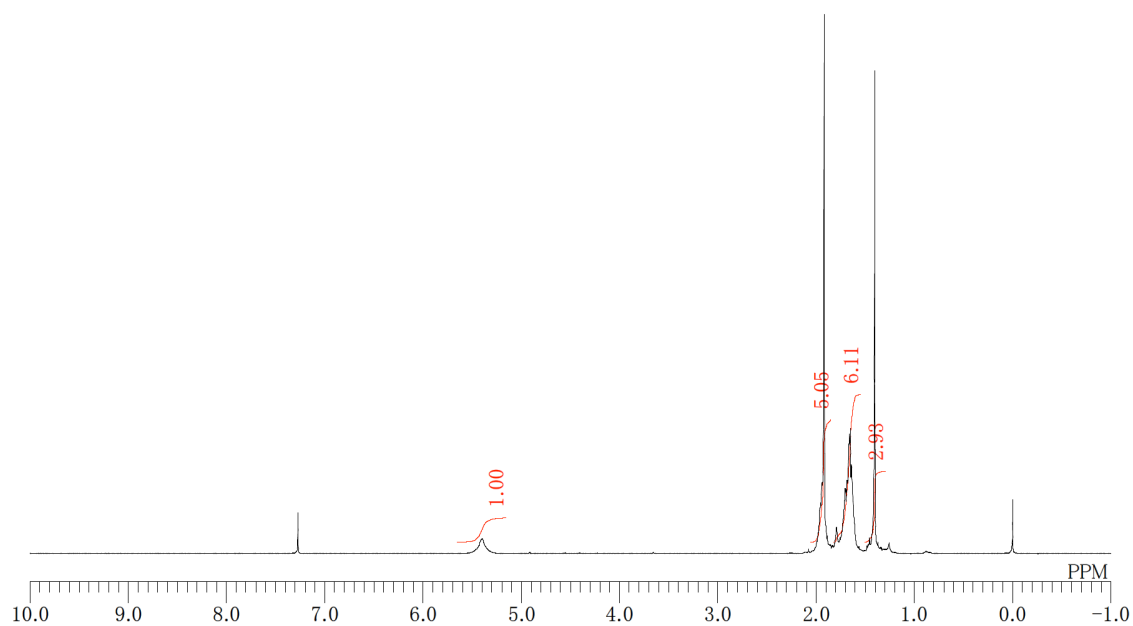

$^{13}\text{C}$  NMR: (100 MHz,  $\text{CDCl}_3$ )

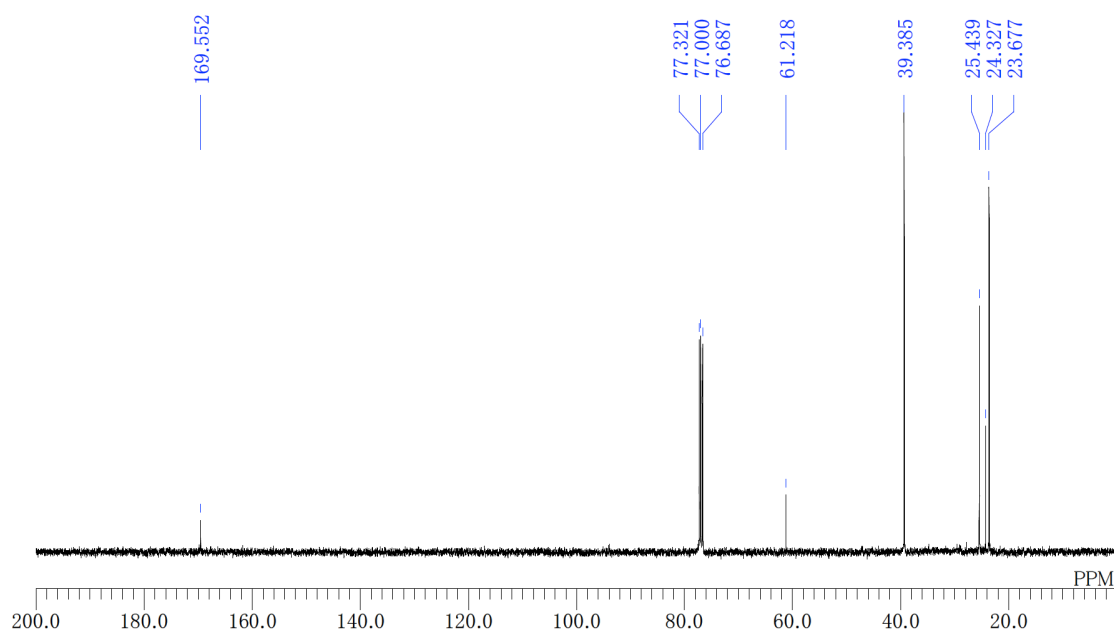

***N*-(2-methylpentan-2-yl)acetamide (2q)**

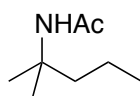

$^1\text{H}$  NMR: (400 MHz,  $\text{CDCl}_3$ )

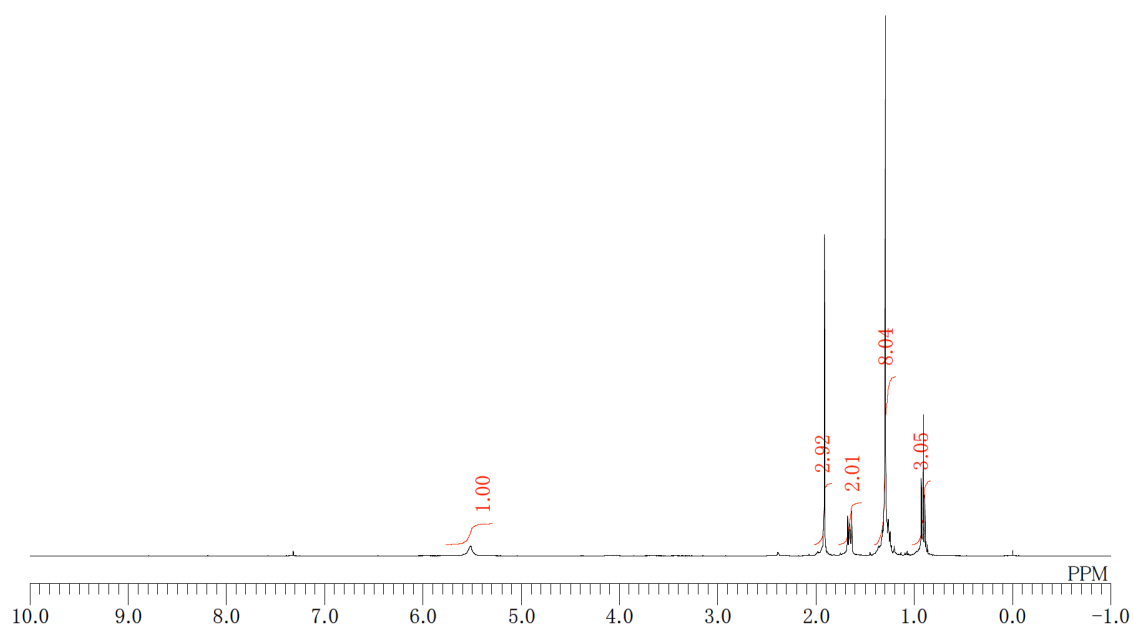

$^{13}\text{C}$  NMR: (100 MHz,  $\text{CDCl}_3$ )

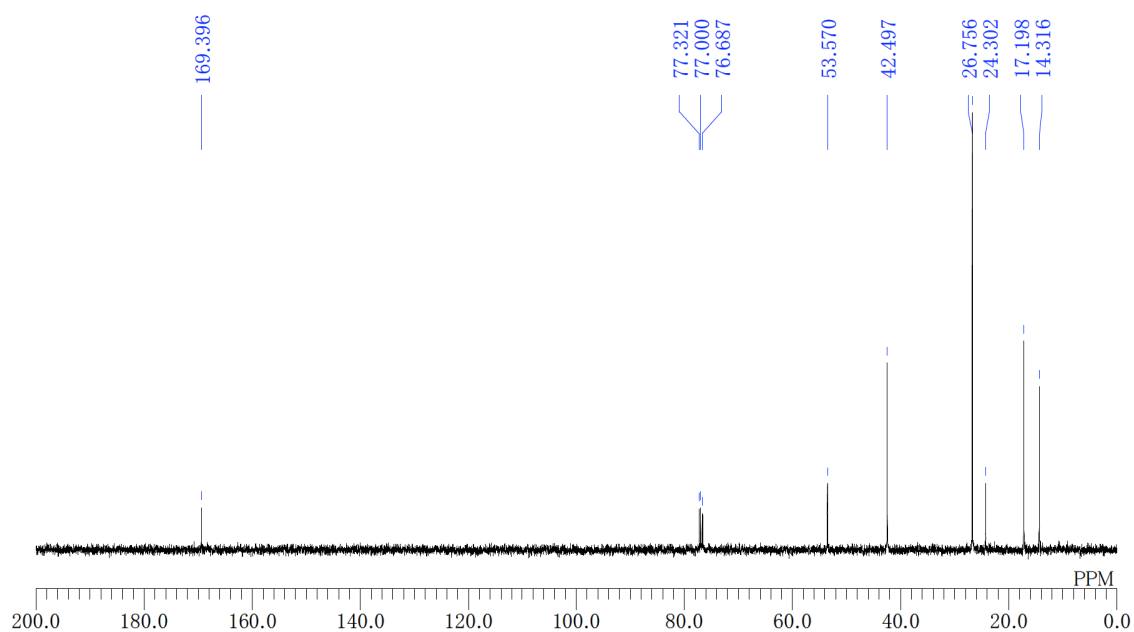

**2,5-diacetamido-2,5-dimethylhexane (2r)**

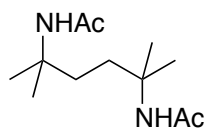

$^1\text{H}$  NMR: (400 MHz, DMSO- $d_6$ )

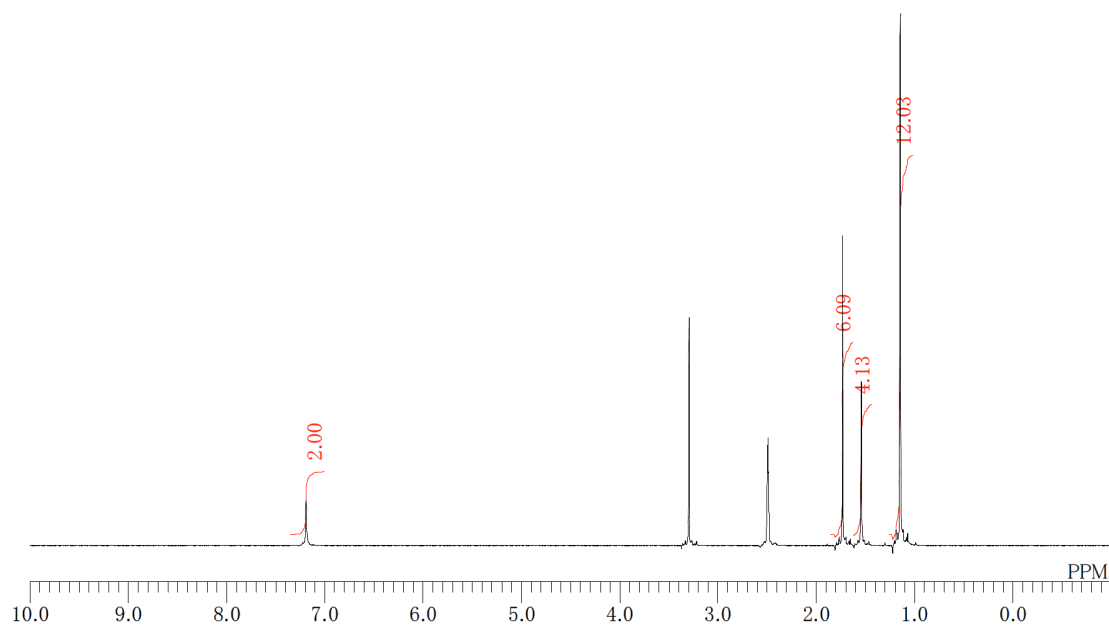

$^{13}\text{C}$  NMR: (100 MHz, DMSO- $d_6$ )

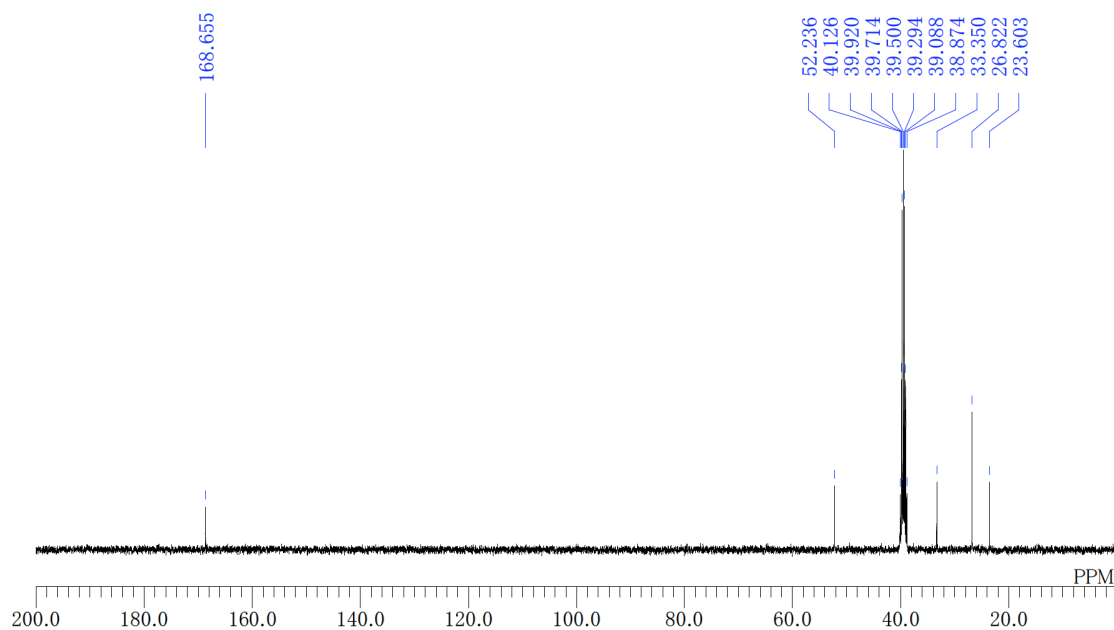



**1,3-diacetamidoadamantane (2s)**

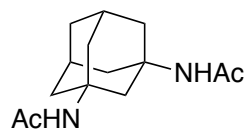

$^1\text{H}$  NMR: (400 MHz,  $\text{CDCl}_3$ )

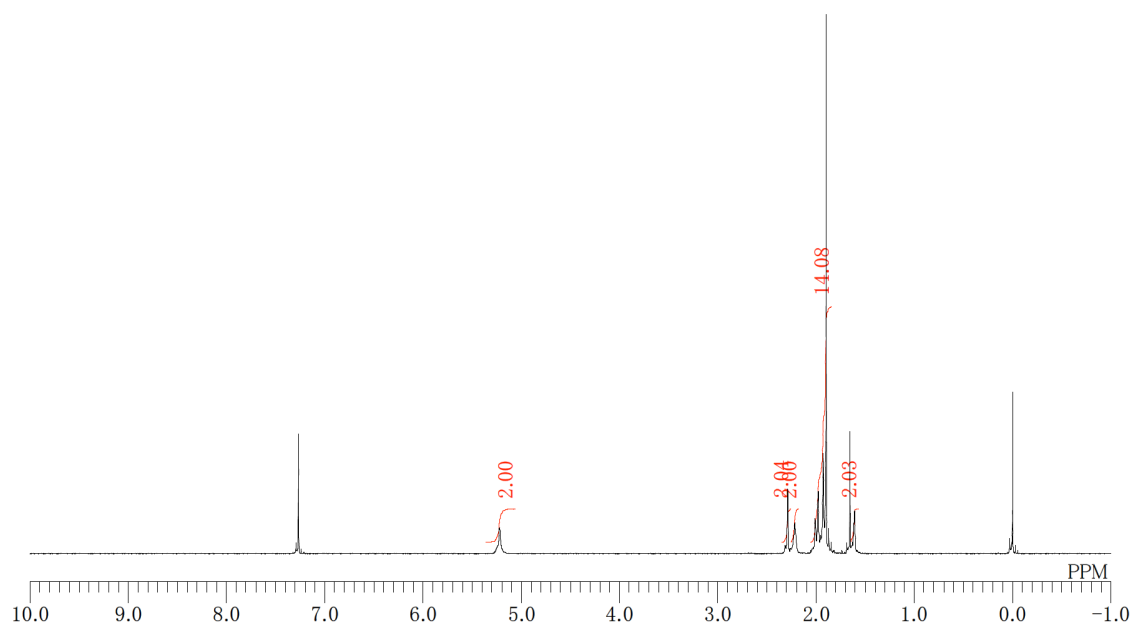

$^{13}\text{C}$  NMR: (100 MHz,  $\text{CDCl}_3$ )

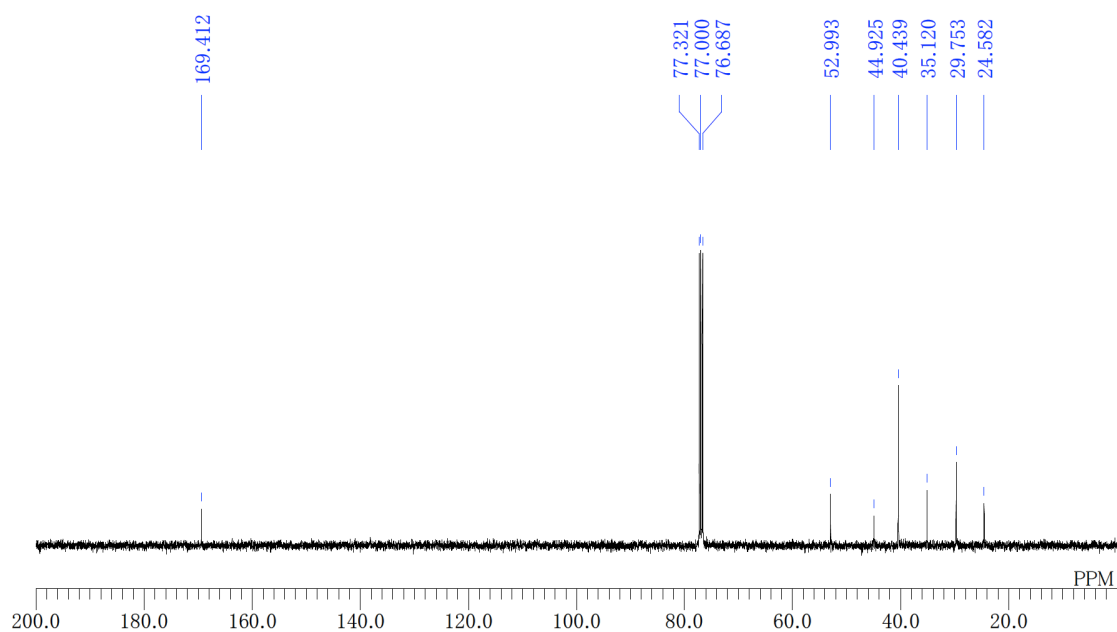

**3-methyl-3-propionylaminobutyl benzoate (3)**

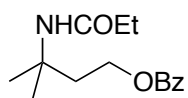

$^1\text{H}$  NMR: (400 MHz,  $\text{CDCl}_3$ )

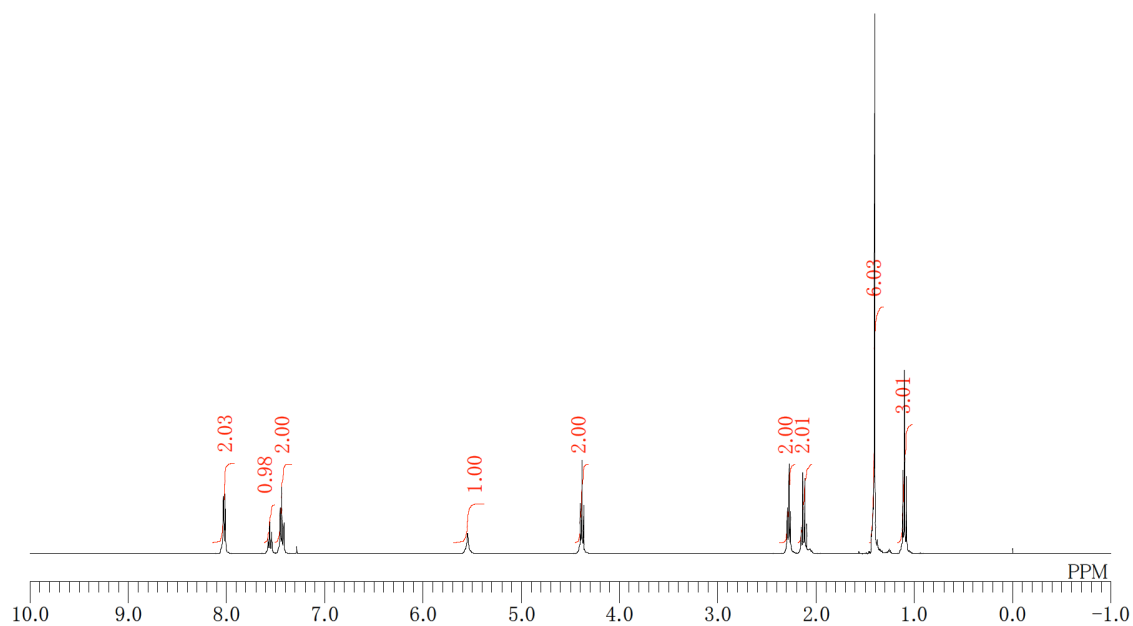

$^{13}\text{C}$  NMR: (100 MHz,  $\text{CDCl}_3$ )

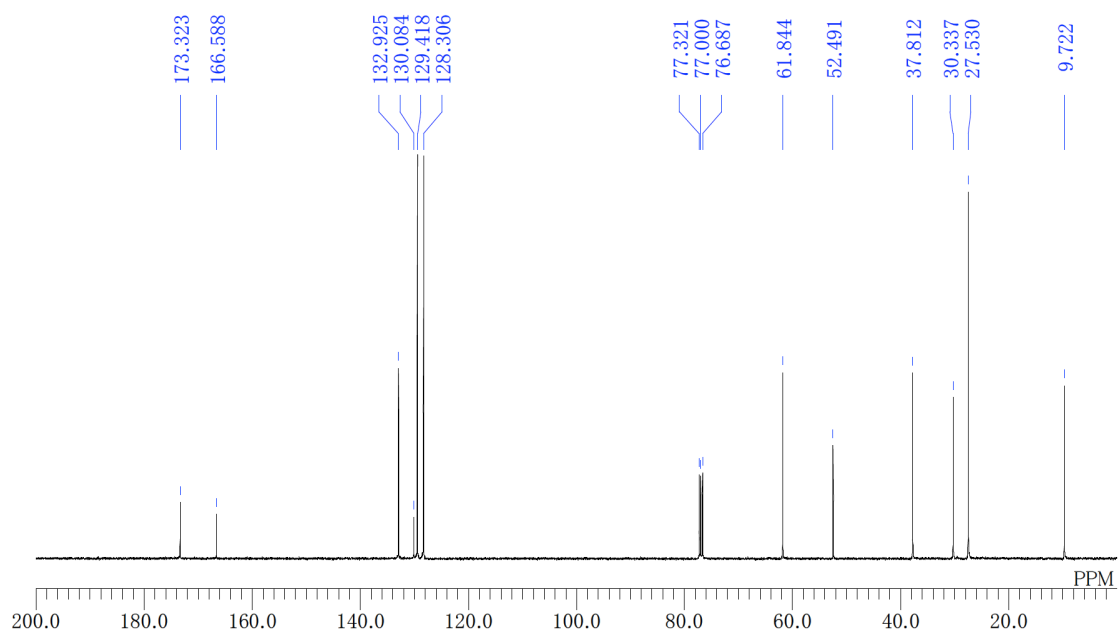

### 3-benzamido-3-methylbutyl benzoate (4)

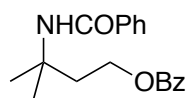

$^1\text{H}$  NMR: (400 MHz,  $\text{CDCl}_3$ )

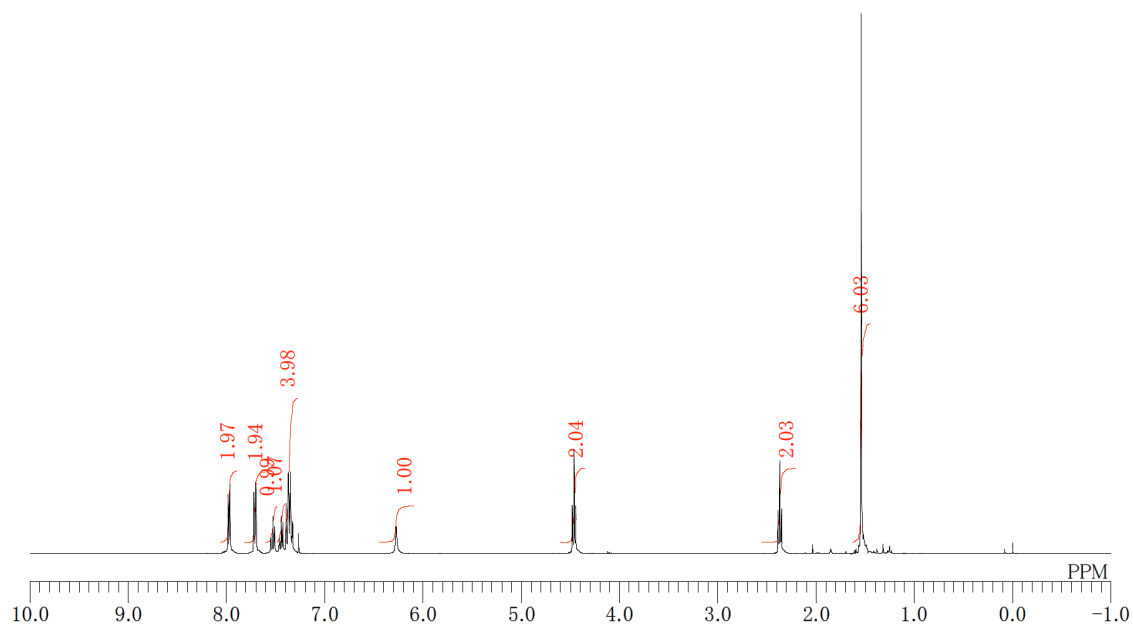

$^{13}\text{C}$  NMR: (100 MHz,  $\text{CDCl}_3$ )

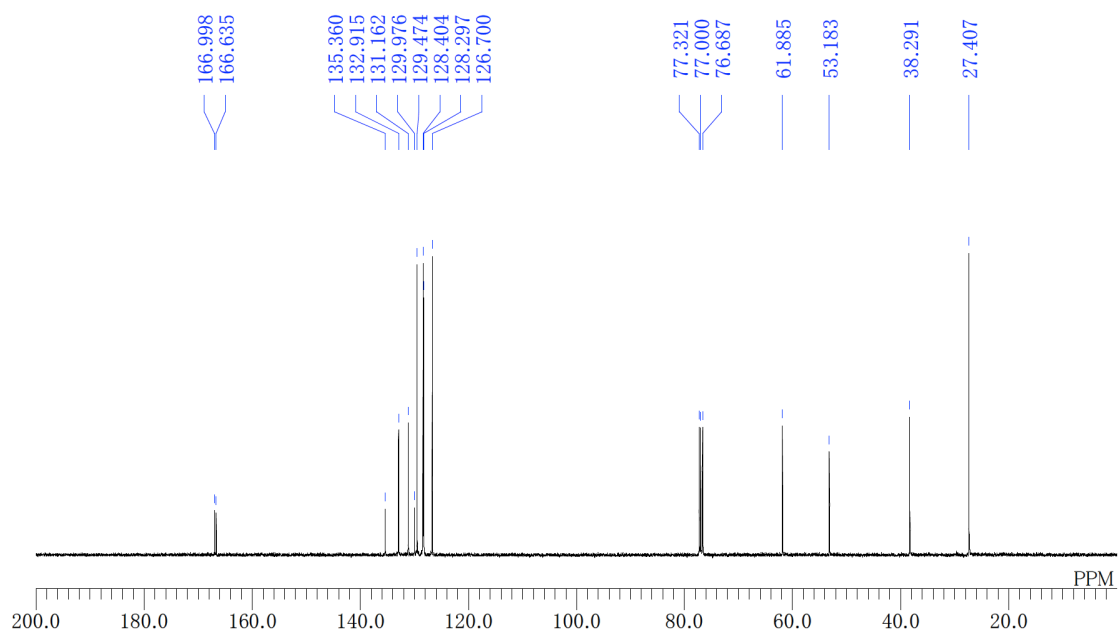

**3-hydroxy-1,1-dimethyl-propylamine hydrochloride (5)**

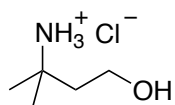

$^1\text{H}$  NMR: (400 MHz,  $\text{DMSO-}d_6$ )

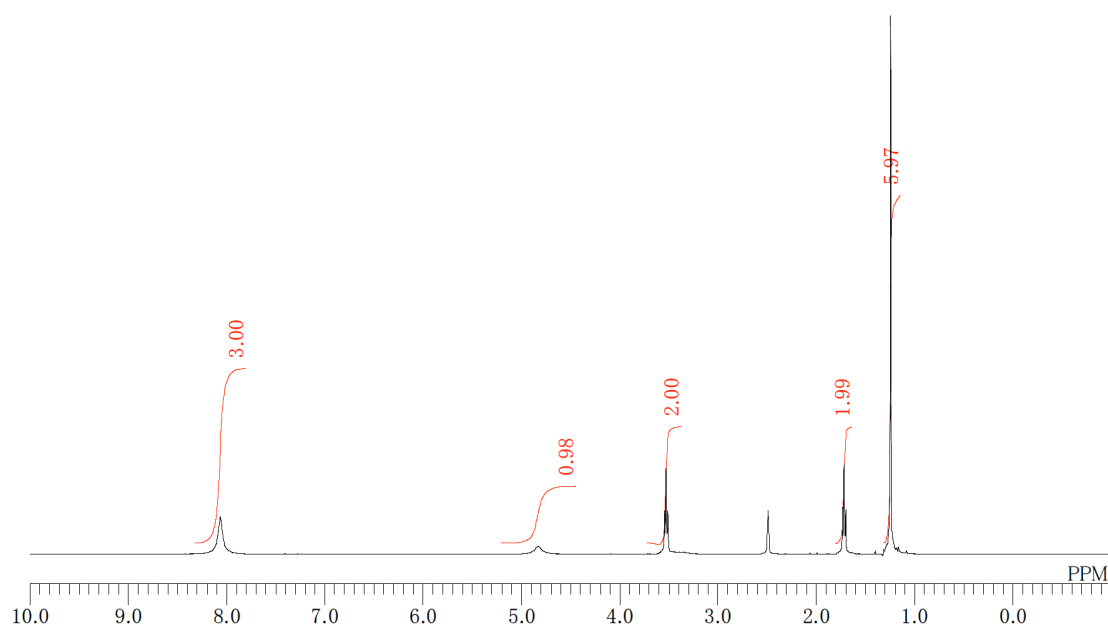

$^{13}\text{C}$  NMR: (100 MHz,  $\text{DMSO-}d_6$ )

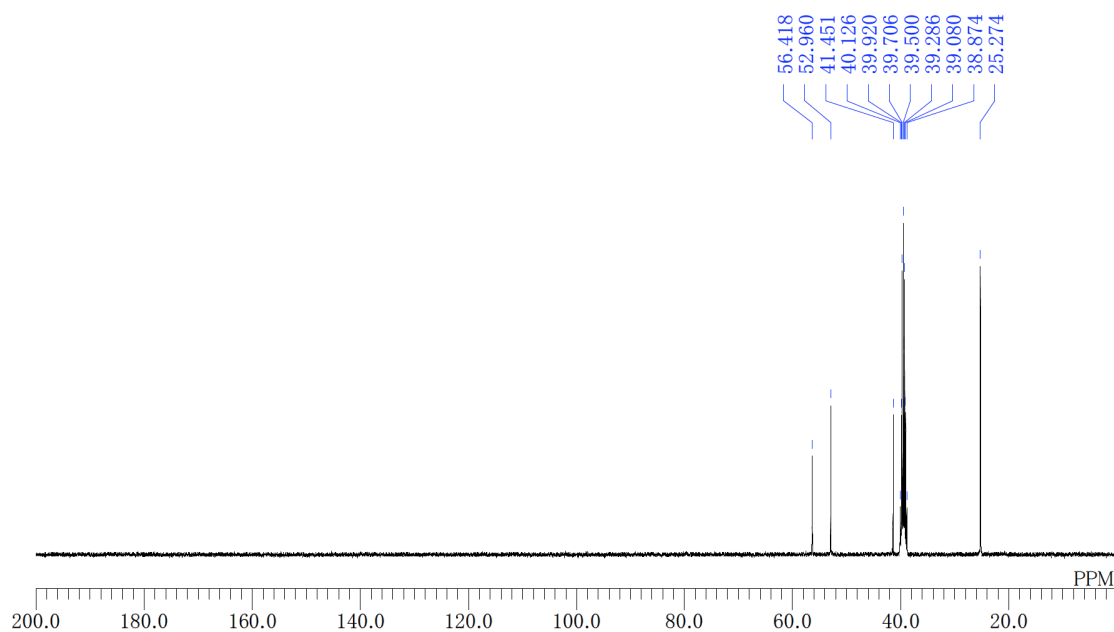

**3-iodo-3-methylbutyl benzoate (6)**

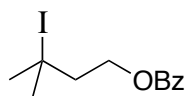

$^1\text{H}$  NMR: (400 MHz,  $\text{CDCl}_3$ )

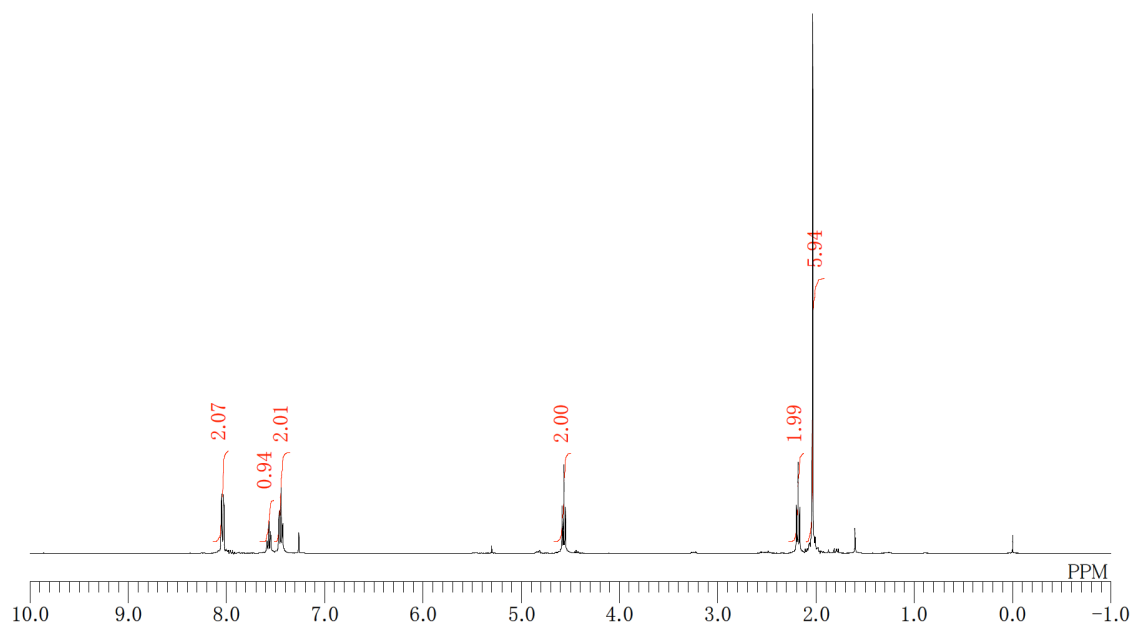

$^{13}\text{C}$  NMR: (100 MHz,  $\text{CDCl}_3$ )

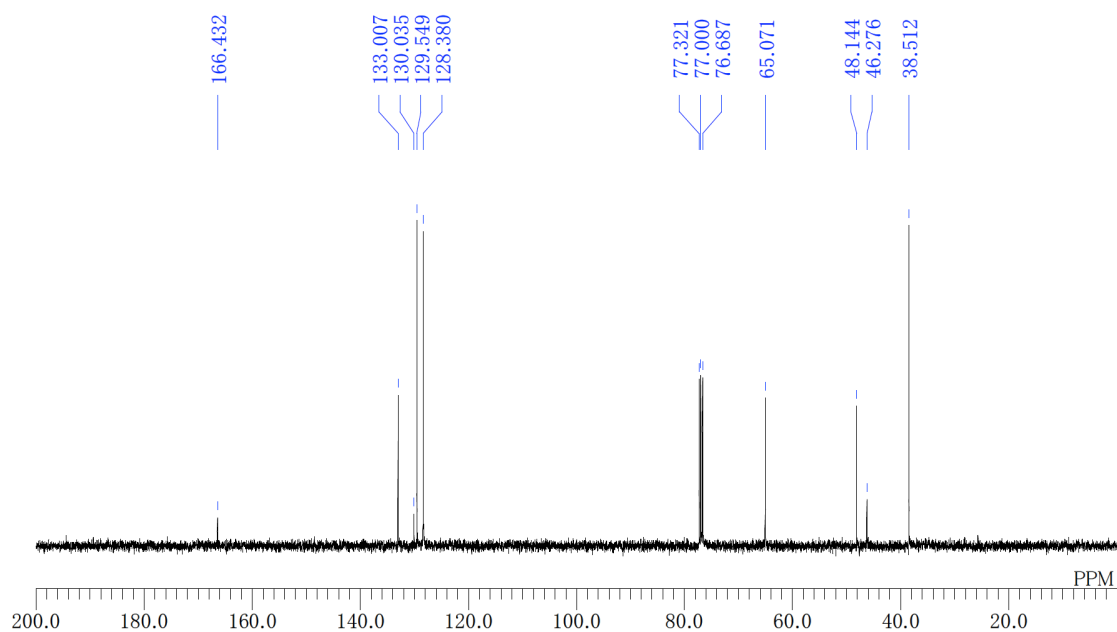

Supplement: c6cc07164c1.pdf [file c6cc07164c1.pdf]
